# Supplementary material for: Burden of tumor mutations, neoepitopes, and other variants are weak predictors of cancer immunotherapy response and overall survival
Source: Genome Med. 2020 Mar 30;12:33. doi: 10.1186/s13073-020-00729-2 (PMC7106909; doi:10.1186/s13073-020-00729-2)
Supplement: Supplementary file 1 — Table S1. (summary of patient samples used for analysis), Table S2. (summary of patient clinical and DNA variant data), Table S3. (per-patient summary of driver variants and neoepitopes), Table S4. (modified neoepitope burdens), Table S5. (tumor-specific splice junction burdens), Table S6. (tumor-specific retained intron and retained intron epitope burdens), Table S7. (processed neoepitope burdens). [file 13073_2020_729_MOESM1_ESM.xlsx]

## Sheet: Supplementary Table S1
Supplementary Table S1: Summary of patient samples used for analysis. Publicly available WES data from 12 studies was used to determine TMB (see Materials and Methods). We summarize the study which produced each data set, the cancer types represented, and the number of patients/tumor samples sequenced. Studies that had complementary RNA sequencing reads available for at least a subset of patients…
Cancer type	Number of patients	Number of tumor samples	Reference
Melanoma	15	15	(15) Amaria et al.
Melanoma	3	6	(4) Carreno et al.*
Melanoma	17	17	(16) Eroglu et al.
Melanoma	16	16	(13) Gao et al.
Prostate	10	10	(17) Graff et al.
Melanoma	38 (27)	39 (28)	(5) Hugo et al.*
Colon, endometrial, thyroid	28	29	(9) Le et al.
RCC	57 (17)	58 (17)	(18) Miao et al.
NSCLC	34	34	(3) Rizvi et al.
Melanoma	35	53	(14) Roh et al.
Melanoma	64 (20)	64 (20)	(6) Snyder et al.*
Melanoma	110 (40)	110 (40)	(1) Van Allen et al.*
Melanoma	4	6	(12) Zaretsky et al.

## Sheet: Supplementary Table S2
Supplementary Table S2: Summary of patient clinical and DNA variant data. The “Patient” column indicates the patient identifier, the “Tumor_ID” column indicates the tumor sample identifier(s), and the “Normal_ID” column indicates the normal sample identifier(s); for patients with more than one tumor sample, median values are presented in subsequent columns of the table where relevant. The “Diseas…
Patient	Tumor_ID	Normal_ID	Disease	Study	Coverage	Total_mutations	SNVs	Inframe_insertions	Inframe_deletions	Frameshift_insertions	Frameshift_deletions	Nonsynonymous_SNVs	Muse_variants	Muse_SNVs	Muse_deletions	Muse_insertions	Mutect_variants	Mutect_SNVs	Mutect_deletions	Mutect_insertions	Pindel_variants	Pindel_SNVs	Pindel_deletions	Pindel_insertions	Radia_variants	Radia_SNVs	Radia_deletions	Radia_insertions	Somaticsniper_variants	Somaticsniper_SNVs	Somaticsniper_deletions	Somaticsniper_insertions	Varscan_variants	Varscan_SNVs	Varscan_deletions	Varscan_insertions	Tumor_HLA1_count	Tumor_HLA2_count	MSI_status	Cancer_stage	aPD1_treatment	aPDL1_treatment	aCTLA4_treatment	Other_treatment	aCTLA4_response	aPD1_response	Combined_response	PFS	OS
1	1D	1-N	melanoma	roh	127.186	879	707	19	8	54	91	125	913	905	0	8	687	687	0	0	184	17	99	68	358	338	0	20	3806	3799	0	7	837	837	0	0	6	5	0	IV	1	0	1	0	0	0	0	NA	542
1	951228-3	126527	melanoma	amaria	234.068	3046	2963	19	4	37	23	550	3360	3339	0	21	2885	2885	0	0	85	3	27	55	2209	2011	0	198	2320	2314	0	6	3098	3098	0	0	6	6	0	IIIB	1	0	1	0	0	0	0	NA	NA
10	988518-5	139734	melanoma	amaria	205.102	276	235	8	2	18	13	4	519	498	0	21	240	240	0	0	42	2	15	25	70	69	0	1	75	64	0	11	624	624	0	0	5	6	0	IIIC	1	0	1	0	1	1	1	NA	NA
11	997065-5	141349	melanoma	amaria	190.524	2357	2285	18	5	28	21	510	2615	2595	0	20	2268	2268	0	0	70	1	25	44	1762	1685	0	77	1753	1747	0	6	2412	2412	0	0	6	6	0	IV	1	0	0	0	NA	0	0	NA	NA
11025-1	Pem1T	Pem1N	prostate	graff	159.331	5942	4701	40	59	232	910	1309	4624	4608	0	16	4715	4715	0	0	1236	12	959	265	3209	2742	0	467	3947	3940	0	7	4503	4503	0	0	6	4	0	IV	1	0	0	0	NA	1	1	973	973
11025-10	Pem10T	Pem10N	prostate	graff	137.817	890	561	25	5	93	206	87	616	615	0	1	456	456	0	0	321	9	207	105	277	252	0	25	668	664	0	4	817	817	0	0	6	6	0	IV	1	0	0	0	NA	1	1	714	714
11025-12	Pem12T	Pem12N	prostate	graff	101.147	437	296	6	2	32	101	56	485	484	0	1	266	266	0	0	144	4	103	37	146	139	0	7	381	378	0	3	347	347	0	0	6	6	0	IV	1	0	0	0	NA	0	0	91	348
11025-13	Pem13T	Pem13N	prostate	graff	95.8276	416	226	11	5	41	133	59	393	391	0	2	205	205	0	0	192	7	135	50	111	107	0	4	121	120	0	1	250	250	0	0	5	6	0	IV	1	0	0	0	NA	0	0	84	690
11025-17	Pem17T	Pem17N	prostate	graff	103.738	716	403	14	9	66	224	63	660	652	0	8	473	473	0	0	300	4	227	69	151	142	0	9	906	903	0	3	346	346	0	0	4	4	0	IV	1	0	0	0	NA	0	0	105	672
11025-22	Pem22T	Pem22N	prostate	graff	111.18	981	737	21	10	49	164	176	795	790	0	5	818	818	0	0	244	6	173	65	421	399	0	22	464	462	0	2	669	669	0	0	6	5	0	IV	1	0	0	0	NA	0	0	105	608
11025-26	Pem26T	Pem26N	prostate	graff	150.302	759	332	65	13	140	209	52	677	666	0	11	194	194	0	0	428	2	221	205	154	146	0	8	141	130	0	11	815	815	0	0	5	6	0	IV	1	0	0	0	NA	1	1	300	544
11025-27	Pem27T	Pem27N	prostate	graff	94.3935	422	331	5	5	9	72	65	648	641	0	7	236	236	0	0	85	2	70	13	201	192	0	9	217	216	0	1	678	678	0	0	6	6	0	IV	1	0	0	0	NA	0	0	99	576
11025-28	Pem28T	Pem28N	prostate	graff	100.363	530	331	15	5	33	146	73	587	583	0	4	350	350	0	0	197	8	147	42	109	106	0	3	150	144	0	6	433	433	0	0	6	6	0	IV	1	0	0	0	NA	0	0	84	407
11025-35	Pem35T	Pem35N	prostate	graff	154.631	555	293	47	12	75	128	59	366	363	0	3	283	283	0	0	257	0	138	119	152	139	0	13	195	193	0	2	462	462	0	0	5	4	0	IV	0	0	0	0	NA	NA	NA	NA	NA
12	1007449-2	143213	melanoma	amaria	188.656	1061	998	12	2	25	24	200	1289	1275	0	14	998	998	0	0	63	3	23	37	558	533	0	25	506	500	0	6	1212	1212	0	0	4	5	0	IIIC	1	0	0	0	NA	0	0	NA	NA
12	12A	12-N	melanoma	roh	139.404	1506	1182	34	12	82	196	228	1311	1301	0	10	1201	1201	0	0	334	18	202	114	726	686	0	40	1588	1584	0	4	1391	1391	0	0	6	6	0	IV	0	0	1	0	1	NA	1	NA	835
13	1004223-5	142826	melanoma	amaria	183.419	13925	13865	8	3	22	27	2956	14281	14258	0	23	13743	13743	0	0	63	3	30	30	10963	10577	0	386	10081	10076	0	5	12468	12468	0	0	4	4	0	IIIC	1	0	1	0	1	1	1	NA	NA
14	1016452-2	144488	melanoma	amaria	186.686	6493	6431	8	4	29	21	1299	6696	6681	0	15	6318	6318	0	0	66	4	26	36	5038	4817	0	221	5135	5126	0	9	6119	6119	0	0	4	5	0	IIIC	1	0	1	0	0	0	0	NA	NA
15	1018464-1	144614	melanoma	amaria	149.165	36313	36141	35	6	54	77	7901	36806	36768	0	38	35316	35316	0	0	165	5	74	86	29782	28943	0	839	26848	26841	0	7	32280	32280	0	0	6	5	0	IV	1	0	1	0	1	1	1	NA	NA
15	15C	15-N	melanoma	roh	136.31	3289	2075	101	78	270	765	485	1939	1937	0	2	2011	2011	0	0	1242	40	833	369	1478	1419	0	59	1500	1500	0	0	1978	1978	0	0	6	4	0	IV	1	0	0	0	NA	1	1	NA	466
15349_CCPM_0600855	SRR6450189	SRR6511548	RCC	miao	212.859	5899	5686	41	4	105	63	354	302	297	0	5	235	235	0	0	1051	842	65	144	75	74	0	1	117	112	0	5	1242	1242	0	0	6	3	0	IV	1	0	0	0	NA	1	1	499	499
15349_CCPM_0600862	SRR6461181;SRR6504582	SRR6461182;SRR6461182	RCC	miao	185	2387	2259.5	27.5	4	55	41	156	310	307	0	3	151.5	151.5	0	0	461.5	344.5	39	78	79.5	77.5	0	2	112	110	0	2	898.5	898.5	0	0	6	3	0	IV	1	0	0	0	NA	0	0	66	293
16	1029860-5	146561	melanoma	amaria	220.411	961	929	2	1	10	19	170	1097	1085	0	12	912	912	0	0	31	2	17	12	619	595	0	24	671	667	0	4	1199	1199	0	0	4	4	0	IIIB	1	0	0	0	NA	0	0	NA	NA
16	16C;16D	16-N;16-N	melanoma	roh	139.603	4553	3402.5	39	62	190.5	859	880	3334.5	3326	0	8.5	3395.5	3395.5	0	0	1158.5	26.5	908	224	2375	2222.5	0	152.5	2641	2636.5	0	4.5	3088.5	3088.5	0	0	6	6	0	IV	1	0	1	0	0	0	0	NA	613
18	18A;18C	18-N;18-N	melanoma	roh	140.351	649.5	473.5	19.5	4.5	55.5	96.5	70.5	663	650	0	13	534.5	534.5	0	0	182	11.5	98.5	72	165	157.5	0	7.5	162.5	160.5	0	2	666.5	666.5	0	0	6	6	0	IV	1	0	1	0	0	0	0	NA	539
19	19D	19-N	melanoma	roh	127.476	28327	26951	91	116	484	685	4142	27655	27580	0	75	22897	22897	0	0	1378	23	796	559	20791	19318	0	1473	34561	34501	0	60	24515	24515	0	0	6	6	0	IV	1	0	1	0	0	0	0	NA	636
2	18931416	130713	melanoma	amaria	211.821	6109	6055	8	3	22	21	1413	6520	6502	0	18	5974	5974	0	0	57	3	24	30	4348	3839	0	509	1713	1709	0	4	5220	5220	0	0	6	6	0	IIIB	1	0	0	0	NA	1	1	NA	NA
2	2E	2-N	melanoma	roh	145.915	1413	1235	26	5	68	79	222	1316	1307	0	9	1278	1278	0	0	187	13	82	92	811	765	0	46	2422	2419	0	3	1380	1380	0	0	5	6	0	IV	1	0	1	0	0	0	0	NA	719
20	20A;20E	20-N;20-N	melanoma	roh	148.159	10926.5	10772	14	10	42.5	88	2613	10754.5	10725.5	0	29	10805	10805	0	0	157.5	7	97.5	53	8157.5	7473.5	0	684	7587	7584.5	0	2.5	9787	9787	0	0	6	4	0	IV	1	0	1	0	0	0	0	NA	784
21	21C	21-N	melanoma	roh	130.586	3132	2950	19	6	49	108	656	3042	3029	0	13	2984	2984	0	0	193	17	111	65	2042	1842	0	200	1743	1734	0	9	2762	2762	0	0	6	6	0	IV	1	0	1	0	0	0	0	NA	247
22	22A;22B	22-N;22-N	melanoma	roh	156.711	1256.5	490	84.5	40.5	198.5	443	75.5	439.5	430.5	0	9	520.5	520.5	0	0	786.5	27	481	278.5	164	156	0	8	1245	1238	0	7	703	703	0	0	6	5	0	IV	0	0	1	0	1	NA	1	NA	623
23	23A	23-N	melanoma	roh	126.504	844	489	33	9	78	235	59	534	524	0	10	439	439	0	0	384	35	241	108	126	121	0	5	282	278	0	4	635	635	0	0	4	6	0	IV	1	0	1	0	0	0	0	NA	670
24	24C	24-N	melanoma	roh	163.607	5268	5142	17	8	38	63	1119	5196	5172	0	24	5254	5254	0	0	122	2	71	49	3650	3356	0	294	2651	2647	0	4	4787	4787	0	0	6	5	0	IV	1	0	1	0	0	1	1	NA	1254
25	25A;25C	25-N;25-N	melanoma	roh	173.531	1464.5	1281	30	7	64	82.5	256	1400	1383	0	17	1412	1412	0	0	182	7.5	88	86.5	797	743	0	54	2198	2192.5	0	5.5	1443.5	1443.5	0	0	6	3	0	IV	1	0	1	0	0	0	0	NA	894
26	26C;26E	26-N;26-N	melanoma	roh	181.322	6083	5830	29.5	13	88	122.5	1277	5720.5	5706.5	0	14	6135.5	6135.5	0	0	250.5	10.5	129.5	110.5	4192	3804.5	0	387.5	5373.5	5366.5	0	7	5698.5	5698.5	0	0	6	6	0	IV	1	0	1	0	0	0	0	NA	1256
28	28A;28D	28-N;28-N	melanoma	roh	144.696	2731.5	2593.5	15	7.5	40.5	75	589	2736	2723	0	13	2666.5	2666.5	0	0	143.5	8.5	81	54	1927.5	1818	0	109.5	2034.5	2028	0	6.5	2624.5	2624.5	0	0	5	6	0	IV	1	0	1	0	0	0	0	NA	314
29	29C	29-N	melanoma	roh	145.468	1818	1600	28	6	61	123	323	1776	1759	0	17	1726	1726	0	0	225	10	126	89	962	912	0	50	886	881	0	5	1659	1659	0	0	6	6	0	IV	1	0	1	0	0	0	0	NA	548
3	3C;3D1;3D2	3-N;3-N;3-N	melanoma	roh	202.071	1988	1319	88	49	243	314	240	1071	1066	0	15	1902	1902	0	0	708	21	363	324	378	335	0	43	128	125	0	3	958	958	0	0	6	6	0	IV	1	0	1	0	0	0	0	NA	447
3	967658-5	132530	melanoma	amaria	164.014	187	123	18	3	22	21	1	461	451	0	10	99	99	0	0	61	0	21	40	43	43	0	0	69	65	0	4	409	409	0	0	5	6	0	IV	1	0	1	0	0	0	0	NA	NA
31	31A	31-N	melanoma	roh	130.993	2312	1865	40	22	120	265	449	1820	1815	0	5	2015	2015	0	0	445	11	285	149	1498	1406	0	92	935	927	0	8	1959	1959	0	0	6	6	0	IV	0	0	1	0	1	NA	1	NA	1790
32	32A	32-N	melanoma	roh	137.278	572	359	19	7	56	131	43	449	441	0	8	381	381	0	0	223	14	141	68	136	131	0	5	138	132	0	6	633	633	0	0	6	5	0	IV	1	0	1	0	0	0	0	NA	927
33	33A;33C	33-N;33-N	melanoma	roh	158.306	1989.5	1878.5	17	4	36.5	53.5	401.5	1939	1928	0	11	2163.5	2163.5	0	0	114.5	5	57.5	52	1067.5	996	0	71.5	947.5	943	0	4.5	1774.5	1774.5	0	0	5	4.5	0	IV	1	0	1	0	0	0	0	NA	359
34	34A	34-N	melanoma	roh	130.147	11225	10667	40	25	110	383	2790	10139	10128	0	11	10955	10955	0	0	581	38	395	148	8519	7951	0	568	5644	5639	0	5	9710	9710	0	0	6	4	0	IV	1	0	1	0	0	1	1	NA	608
37	37B	37-N	melanoma	roh	143.068	1094	705	54	10	173	152	96	574	568	0	6	791	791	0	0	393	32	160	201	113	108	0	5	79	77	0	2	802	802	0	0	6	5	0	IV	0	0	1	0	1	NA	1	NA	551
4	4D	4-N	melanoma	roh	136.479	1401	986	32	17	142	224	132	1104	1075	0	29	1193	1193	0	0	420	35	233	152	294	278	0	16	539	533	0	6	1272	1272	0	0	6	6	0	IV	1	0	1	0	0	0	0	NA	1083
4	966214-4	132534	melanoma	amaria	223.26	1012	944	15	4	33	16	173	1269	1256	0	13	870	870	0	0	70	3	20	47	633	556	0	77	417	409	0	8	1326	1326	0	0	6	6	0	IIIB	1	0	0	0	NA	1	1	NA	NA
41	41A	41-N	melanoma	roh	156.465	1174	844	25	18	107	180	143	876	868	0	8	973	973	0	0	325	13	196	116	374	351	0	23	1249	1248	0	1	991	991	0	0	6	6	0	IV	1	0	1	0	0	0	0	NA	861
42	42E	42-N	melanoma	roh	129.811	1342	1220	13	5	32	72	246	1370	1357	0	13	1268	1268	0	0	127	7	77	43	823	776	0	47	1589	1587	0	2	1367	1367	0	0	6	5	0	IV	1	0	1	0	0	0	0	NA	2111
45	45C;45E	45-N;45-N	melanoma	roh	127.826	15593	14827	50	79	261	376	2182.5	15263.5	15211	0	52.5	12601	12601	0	0	772.5	21	451.5	300	10970	10426	0	544	17422	17391	0	31	13266.5	13266.5	0	0	4.5	4	0	IV	1	0	1	0	0	0	0	NA	1320
47	47A;47D	47-N;47-N	melanoma	roh	180.221	5600.5	5100	38	32.5	139	291	1170.5	4943	4933	0	10	7986.5	7986.5	0	0	512	26.5	321.5	164	3566	3130	0	436	2499	2495	0	4	4414.5	4414.5	0	0	6	6	0	IV	1	0	1	0	0	1	1	NA	1092
49	49E	49-N	melanoma	roh	140.694	7077	6926	17	9	33	92	1513	6979	6956	0	23	7033	7033	0	0	159	10	100	49	5230	4868	0	362	6489	6479	0	10	6591	6591	0	0	6	6	0	IV	1	0	1	0	0	0	0	NA	1094
5	5A	5-N	melanoma	roh	163.936	2036	1842	29	7	74	84	368	1828	1817	0	11	2042	2042	0	0	201	13	91	97	1157	1087	0	70	710	703	0	7	1854	1854	0	0	6	5	0	IV	0	0	1	0	1	NA	1	NA	1052
5	971484-3	133058	melanoma	amaria	175.113	310	262	11	0	22	15	39	534	525	0	9	230	230	0	0	50	3	14	33	77	76	0	1	95	89	0	6	508	508	0	0	6	6	0	IIIB	1	0	0	0	NA	0	0	NA	NA
50	50A;50C	50-N;50-N	melanoma	roh	127.19	14495.5	14171	30	16	95	183.5	3485	13790	13780	0	10	14706.5	14706.5	0	0	337.5	21.5	197	119	10765	10060.5	0	704.5	8342.5	8336	0	6.5	12257.5	12257.5	0	0	6	5	0	IV	1	0	1	0	0	0	0	NA	1616
53	53A;53D	53-N;53-N	melanoma	roh	138.449	2829.5	2620	30	10.5	68.5	100.5	596.5	2841.5	2829.5	0	12	2623.5	2623.5	0	0	214.5	11	109.5	94	1910	1799	0	111	2296.5	2291.5	0	5	2724.5	2724.5	0	0	6	6	0	IV	1	0	1	0	0	0	0	NA	277
54	54A;54C	54-N;54-N	melanoma	roh	142.214	2669.5	2378	33	11	70.5	177	489	2451.5	2440	0	11.5	2436	2436	0	0	297	11	185.5	100.5	1649.5	1549	0	100.5	2880	2872	0	8	2389	2389	0	0	6	5	0	IV	1	0	1	0	0	0	0	NA	714
6	6B	6-N	melanoma	roh	143.647	612	490	15	9	33	65	65	693	684	0	9	571	571	0	0	127	7	74	46	208	199	0	9	228	225	0	3	778	778	0	0	6	6	0	IV	1	0	1	0	0	1	1	NA	842
6	978614-3	134582	melanoma	amaria	141.379	6297	6147	15	8	65	62	1279	6550	6536	0	14	6028	6028	0	0	148	5	68	75	5014	4842	0	172	4719	4715	0	4	5775	5775	0	0	6	5	0	IIIC	1	0	1	0	1	1	1	NA	NA
7	7A;7D	7-N;7-N	melanoma	roh	156.439	484	370.5	15	3	42	53.5	23.5	571.5	559	0	12.5	453	453	0	0	111	5.5	52.5	53	91.5	88.5	0	3	106	102	0	4	691	691	0	0	6	6	0	IV	1	0	1	0	0	1	1	NA	1174
7	980720-34	134910	melanoma	amaria	162.055	1205	1147	19	2	16	21	240	1461	1453	0	8	1118	1118	0	0	60	3	23	34	787	720	0	67	772	763	0	9	1298	1298	0	0	6	6	0	IIIB	1	0	0	0	NA	0	0	NA	NA
8	982746-6	135491	melanoma	amaria	244.962	2472	2357	21	6	51	37	517	2734	2716	0	18	2242	2242	0	0	121	7	42	72	1686	1555	0	131	1152	1144	0	8	2384	2384	0	0	6	4	0	IIIC	1	0	1	0	0	0	0	NA	NA
9	9A;9C;9D	9-N;9-N;9-N	melanoma	roh	176.321	1139	585	52	18	148	336	51	652	646	0	6	558	558	0	0	578	33	351	194	119	114	0	6	150	138	0	7	971	971	0	0	5	6	0	IV	1	0	1	0	0	1	1	NA	1213
AL4602	SRR2648103	SRR2648102	NSCLC	rizvi	99.0657	781	560	16	10	54	141	180	537	536	0	1	447	447	0	0	246	32	149	65	121	116	0	5	106	106	0	0	417	417	0	0	6	3	0	IV	1	0	0	0	NA	1	1	252	252
AU5884	SRR2648105	SRR2648104	NSCLC	rizvi	93.8869	440	356	8	5	23	48	72	373	372	0	1	292	292	0	0	104	21	52	31	58	55	0	3	81	78	0	3	376	376	0	0	6	3	0	IV	1	0	0	0	NA	0	0	54	NA
BL3403	SRR2648107	SRR2648106	NSCLC	rizvi	98.509	832	424	25	21	84	278	50	357	356	0	1	221	221	0	0	443	45	294	104	77	72	0	5	98	97	0	1	515	515	0	0	6	3	0	IV	1	0	0	0	NA	0	0	195	NA
CA9903	SRR2648109	SRR2648108	NSCLC	rizvi	106.37	2998	1268	148	110	320	1152	332	1123	1121	0	2	1151	1151	0	0	1782	56	1263	463	732	686	0	46	621	619	0	2	1285	1285	0	0	6	3	0	IV	1	0	0	0	NA	1	1	435	NA
Case1-UCLA	SRR3653952;SRR3653953	SRR3653957;SRR3653957	melanoma	zaretsky	162.944	7831	7276	40	26.5	129.5	359	1189	6498.5	6491.5	0	7	6766.5	6766.5	0	0	551	9	382	160	5190	4936	0	254	5760.5	5757	0	3.5	7636	7636	0	0	6	3	0	M1c	1	0	0	0	NA	0	0	419	691
Case2-UCLA	SRR3653959	SRR3653961	melanoma	zaretsky	178.982	2634	2319	47	15	103	150	315	1739	1732	0	7	1908	1908	0	0	302	8	154	140	1292	1240	0	52	2431	2428	0	3	2812	2812	0	0	6	3	0	M1b	1	0	0	0	NA	0	0	734	945
Case3-UCLA	SRR3653963	SRR3653964	melanoma	zaretsky	194.019	3027	2728	51	20	120	108	329	2532	2523	0	9	3040	3040	0	0	287	12	115	160	1842	1729	0	113	2122	2117	0	5	3143	3143	0	0	6	3	0	M1c	1	0	0	0	NA	0	0	453	974
Case4-UCLA	SRR3653954;SRR3653955	SRR3653956;SRR3653956	melanoma	zaretsky	250.021	3884	3435.5	47	37	132	232.5	388	3122.5	3114.5	0	8	4209	4209	0	0	488.5	43.5	271.5	173.5	2160	2029	0	131	3058.5	3052	0	6.5	3925.5	3925.5	0	0	6	3	0	M1c	1	0	0	0	NA	0	0	888	1262
CR0095	SRR3341169	SRR3341168	melanoma	snyder	209.891	2210	2055	15	13	40	87	317	1907	1893	0	14	2083	2083	0	0	242	92	95	55	1066	1017	0	49	1221	1217	0	4	1771	1771	0	0	6	3	0	M1b	0	0	1	0	1	NA	1	455	2082
CR04885	SRR3341171	SRR3341170	melanoma	snyder	97.6326	15530	7311	353	927	761	6178	2057	6626	6624	0	2	7136	7136	0	0	8308	73	7126	1109	6025	5805	0	220	5661	5658	0	3	7290	7290	0	0	6	3	0	IIIC	0	0	1	0	1	NA	1	595	767
CR06670	SRR3341173	SRR3341172	melanoma	snyder	100.781	2430	2337	9	3	42	39	585	2604	2602	0	2	2197	2197	0	0	99	6	42	51	1741	1633	0	108	1041	1040	0	1	2347	2347	0	0	6	3	0	IIIC	0	0	1	0	1	NA	1	1176	1351
CR1509	SRR3341175	SRR3341174	melanoma	snyder	254.631	3907	3498	43	23	142	201	594	3452	3436	0	16	3511	3511	0	0	484	84	223	177	1566	1449	0	117	1435	1428	0	7	2709	2709	0	0	6	3	0	M1c	0	0	1	0	1	NA	1	504	1644
CR22640	SRR3341177	SRR3341176	melanoma	snyder	109.496	2812	1836	75	61	194	646	465	1732	1725	0	7	1626	1626	0	0	1027	54	706	267	1142	1082	0	60	557	555	0	2	1661	1661	0	0	6	3	0	M1c	0	0	1	0	1	NA	1	1512	1571
CR3665	SRR3341179	SRR3341178	melanoma	snyder	201.285	1809	1408	37	14	137	213	210	1169	1157	0	12	1274	1274	0	0	489	109	220	160	412	392	0	20	519	513	0	6	1052	1052	0	0	6	3	0	M1b	0	0	1	0	1	NA	1	336	986
CR4880	SRR3341181	SRR3341180	melanoma	snyder	159.499	31840	30671	76	106	381	606	3901	28521	28431	0	90	25054	25054	0	0	1232	96	692	444	21222	20490	0	732	37906	37839	0	67	26988	26988	0	0	6	3	0	M1b	0	0	1	0	1	NA	1	413	1972
CR6126	SRR3341183	SRR3341182	melanoma	snyder	129.102	2654	2564	14	3	37	36	560	2532	2529	0	3	2629	2629	0	0	95	5	40	50	1795	1668	0	127	1461	1458	0	3	2715	2715	0	0	6	3	0	M1b	0	0	1	0	1	NA	1	694	694
CR6161	SRR3341185	SRR3341184	melanoma	snyder	98.619	4232	3546	64	49	163	410	827	3297	3290	0	7	3672	3672	0	0	716	38	456	222	2525	2371	0	154	1989	1986	0	3	3603	3603	0	0	5	3	0	M1b	0	0	1	0	1	NA	1	950	950
CR7623	SRR3341187	SRR3341186	melanoma	snyder	129.334	1898	1818	9	6	22	43	398	1713	1695	0	18	2011	2011	0	0	140	68	48	24	783	664	0	119	417	413	0	4	1410	1410	0	0	6	3	0	M1c	0	0	1	0	0	NA	0	329	1461
CR9306	SRR3341189	SRR3341188	melanoma	snyder	230.997	9073	8860	30	12	59	112	1496	8719	8681	0	38	9021	9021	0	0	297	100	114	83	5701	5459	0	242	6978	6972	0	6	7344	7344	0	0	5	3	0	M1c	0	0	1	0	1	NA	1	294	1936
CR9699	SRR3341191	SRR3341190	melanoma	snyder	208.092	8962	8397	38	13	154	360	1483	7400	7385	0	15	8209	8209	0	0	788	251	355	182	4489	4171	0	318	5968	5953	0	15	6121	6121	0	0	6	3	0	M1c	0	0	1	0	1	NA	1	364	1607
CRNR0244	SRR3341193	SRR3341192	melanoma	snyder	121.232	2494	2408	12	5	26	43	562	2378	2373	0	5	2494	2494	0	0	88	4	46	38	1535	1398	0	137	729	729	0	0	2258	2258	0	0	6	3	0	M1c	0	0	1	0	0	NA	0	763	767
CRNR2472	SRR3341195	SRR3341194	melanoma	snyder	118.39	2922	2820	15	14	34	39	657	2853	2853	0	0	2852	2852	0	0	111	13	51	47	1794	1673	0	121	355	353	0	2	2289	2289	0	0	6	3	0	M1c	0	0	1	0	0	NA	0	621	621
CRNR4941	SRR3341197	SRR3341196	melanoma	snyder	117.021	512	444	8	6	22	32	117	447	446	0	1	667	667	0	0	80	7	43	30	53	52	0	1	70	69	0	1	490	490	0	0	6	3	0	M1c	0	0	1	0	0	NA	0	2630	2630
CU9061	SRR2648111	SRR2648110	NSCLC	rizvi	112.879	1724	1526	9	13	66	110	349	1444	1441	0	3	1416	1416	0	0	234	35	131	68	946	860	0	86	3422	3414	0	8	2127	2127	0	0	5	3	0	IV	0	0	0	0	NA	NA	0	120	120
DI6359	SRR2648113	SRR2648112	NSCLC	rizvi	95.2572	1157	945	21	11	55	125	256	987	986	0	1	841	841	0	0	240	26	138	76	567	534	0	33	450	445	0	5	993	993	0	0	6	3	0	IV	1	0	0	0	NA	1	1	294	294
DM005	SRR6431455	SRR6431454	melanoma	amaria	382.177	23411	22714	131	26	339	201	3180	21981	21973	0	8	21107	21107	0	0	697	4	235	458	17657	16230	0	1427	3029	3020	0	9	31521	31521	0	0	6	6	0	M1c	1	0	0	0	NA	1	1	429	429
DM007	SRR6431457	SRR6431456	melanoma	amaria	194.601	7594	7467	13	12	46	56	1507	7225	7204	0	21	6879	6879	0	0	127	1	68	58	6471	5810	0	661	5963	5959	0	4	8721	8721	0	0	6	6	0	M1c	1	0	0	0	NA	1	1	952	952
DM009	SRR6431459	SRR6431458	melanoma	amaria	301.097	11572	11333	44	17	93	85	1890	11710	11699	0	11	10850	10850	0	0	238	2	101	135	7749	6842	0	907	4794	4789	0	5	9457	9457	0	0	6	5	0	M1b	1	0	0	0	NA	1	1	304	1916
DM010	SRR6431461	SRR6431460	melanoma	amaria	228.66	10333	6448	995	92	2198	600	1187	3409	3409	0	0	5010	5010	0	0	3943	5	749	3189	5882	5269	0	613	2819	2812	0	7	7505	7505	0	0	5	6	0	M1b	1	0	0	0	NA	1	1	858	1278
DM012	SRR6431463	SRR6431462	melanoma	amaria	157.769	2198	1125	150	39	411	473	218	798	796	0	2	593	593	0	0	1073	3	514	556	1619	1596	0	23	385	381	0	4	1856	1856	0	0	5	6	0	M1c	1	0	0	0	NA	1	1	271	489
DM013	SRR6431465	SRR6431464	melanoma	amaria	198.101	8959	8885	9	4	26	35	1917	8429	8409	0	20	8042	8042	0	0	77	3	39	35	7536	6925	0	611	7602	7591	0	11	10584	10584	0	0	5	5	0	M1c	1	0	0	0	NA	1	1	627	627
DM014	SRR6431467	SRR6431466	melanoma	amaria	270.448	4340	2046	502	89	1245	458	426	1684	1681	0	3	2041	2041	0	0	2316	2	571	1743	2045	1924	0	121	946	931	0	15	3872	3872	0	0	6	6	0	M1c	1	0	0	0	NA	0	0	82	554
DM015	SRR6431469	SRR6431468	melanoma	amaria	204.3	9064	9064	0	0	0	0	1900	8385	8374	0	11	9334	9334	0	0	0	0	0	0	5791	5380	0	411	1936	1922	0	14	13860	13860	0	0	6	6	0	M1c	1	0	0	0	NA	0	0	103	630
DM016	SRR6431471	SRR6431470	melanoma	amaria	144.547	4913	3974	129	39	344	427	856	3288	3288	0	0	2777	2777	0	0	941	3	467	471	4397	4338	0	59	2559	2556	0	3	4884	4884	0	0	6	6	0	M1b	1	0	0	0	NA	0	0	110	356
DM017	SRR6431473	SRR6431472	melanoma	amaria	318.89	10978	10978	0	0	0	0	2073	8453	8450	0	3	11785	11785	0	0	0	0	0	0	10604	9881	0	723	6692	6643	0	49	13479	13479	0	0	5	6	0	M1c	1	0	0	0	NA	0	0	100	228
DM018	SRR6431475	SRR6431474	melanoma	amaria	393.361	14544	4098	2273	1019	4872	2282	842	1234	1233	0	1	1782	1782	0	0	10511	3	3366	7142	6820	6671	0	149	2682	2631	0	51	8870	8870	0	0	6	6	0	M1c	1	0	1	0	1	1	1	608	608
DM019	SRR6431477	SRR6431476	melanoma	amaria	210.287	11257	11008	58	11	109	71	1560	9374	9358	0	16	8670	8670	0	0	251	3	82	166	7019	4851	0	2168	7889	7885	0	4	16378	16378	0	0	6	6	0	M1c	1	0	0	0	NA	1	1	377	377
DM020	SRR6431479	SRR6431478	melanoma	amaria	217.212	6312	6039	59	7	134	73	1244	6142	6139	0	3	7783	7783	0	0	268	1	78	189	1995	1880	0	115	479	475	0	4	2587	2587	0	0	3	5	0	M1c	1	0	0	0	NA	1	1	243	277
DM021	SRR6431481	SRR6431480	melanoma	amaria	214.531	4605	3965	156	18	327	139	549	3497	3486	0	11	3717	3717	0	0	633	2	152	479	3025	2771	0	254	0	0	0	0	14021	14021	0	0	6	6	0	M1c	1	0	0	0	NA	1	1	243	1904
DM022	SRR6431483	SRR6431482	melanoma	amaria	292.459	5722	5450	60	8	122	82	1162	5729	5724	0	5	6597	6597	0	0	263	1	86	176	1355	1247	0	108	434	428	0	6	2081	2081	0	0	6	6	0	M1b	1	0	0	0	NA	1	1	958	958
DM023	SRR6431485	SRR6431484	melanoma	amaria	178.792	8566	8300	63	10	106	87	1173	8441	8436	0	5	7726	7726	0	0	267	3	97	167	6344	5973	0	371	6690	6685	0	5	8113	8113	0	0	6	6	0	M1b	1	0	0	0	NA	0	0	85	170
DM024	SRR6431487	SRR6431486	melanoma	amaria	165.082	3213	2263	203	22	457	268	447	1631	1628	0	3	1953	1953	0	0	947	4	285	658	1747	1630	0	117	720	713	0	7	2638	2638	0	0	6	6	0	IIIC	1	0	0	0	NA	1	1	450	450
DM123062	SRR2648115	SRR2648114	NSCLC	rizvi	110.945	855	509	21	19	68	238	84	421	415	0	6	436	436	0	0	383	39	256	88	158	151	0	7	1537	1528	0	9	786	786	0	0	6	3	0	IV	1	0	0	0	NA	0	0	57	NA
FR9547	SRR2648117	SRR2648116	NSCLC	rizvi	113.867	1412	1182	15	14	62	139	253	1147	1142	0	5	1150	1150	0	0	250	22	151	77	755	666	0	89	605	599	0	6	1447	1447	0	0	5	3	0	IV	1	0	0	0	NA	1	1	126	126
GR0134	SRR2648119	SRR2648118	NSCLC	rizvi	107.851	515	296	16	11	62	130	42	273	273	0	0	333	333	0	0	237	21	140	76	56	56	0	0	55	54	0	1	386	386	0	0	6	3	0	IV	1	0	0	0	NA	1	1	249	NA
GR4788	SRR2648121	SRR2648120	NSCLC	rizvi	102.702	712	521	13	9	55	114	125	416	413	0	3	336	336	0	0	240	54	120	66	151	143	0	8	113	112	0	1	460	460	0	0	6	3	0	IV	1	0	0	0	NA	0	0	57	NA
HE3202	SRR2648123	SRR2648122	NSCLC	rizvi	110.156	2426	2292	10	9	34	81	679	2260	2253	0	7	2292	2292	0	0	151	17	90	44	1599	1486	0	113	1159	1158	0	1	2341	2341	0	0	6	3	0	IV	1	0	0	0	NA	1	1	441	441
Hugo_Pt1	SRR3083866	SRR3083867	melanoma	hugo	318.002	19445	18912	56	26	174	277	2277	16477	16456	0	21	19775	19775	0	0	561	47	293	221	13738	12667	0	1071	17953	17934	0	19	19375	19375	0	0	6	6	0	M1b	1	0	0	0	NA	0	0	NA	607
Hugo_Pt10	SRR4289717	SRR4289716	melanoma	hugo	197.994	2598	2215	38	24	130	191	242	2258	2250	0	8	2530	2530	0	0	380	20	201	159	1289	1204	0	85	2586	2564	0	22	3281	3281	0	0	3	6	0	M1a	1	0	0	0	NA	0	0	NA	387
Hugo_Pt11	SRR4289719	SRR4289718	melanoma	hugo	181.536	2854	2428	46	26	141	213	267	2573	2552	0	21	2662	2662	0	0	416	6	232	178	1601	1493	0	108	2399	2394	0	5	2925	2925	0	0	6	6	0	M1c	1	0	0	0	NA	0	0	NA	467
Hugo_Pt12	SRR3083882	SRR3083883	melanoma	hugo	187.698	1262	876	52	18	137	179	78	584	583	0	1	2073	2073	0	0	390	30	185	175	367	351	0	16	832	827	0	5	1284	1284	0	0	6	3	0	M1c	1	0	0	0	NA	0	0	NA	327
Hugo_Pt13	SRR3083855	SRR3083856	melanoma	hugo	168.198	3859	3559	38	14	102	146	505	3506	3504	0	2	4154	4154	0	0	303	29	142	132	2407	2146	0	261	2272	2269	0	3	3138	3138	0	0	6	3	0	M1c	1	0	0	0	NA	1	1	NA	917
Hugo_Pt14	SRR3083868	SRR3083869	melanoma	hugo	179.075	10940	10661	37	11	86	145	1501	9701	9691	0	10	10235	10235	0	0	287	22	148	117	7832	7376	0	456	7486	7479	0	7	9913	9913	0	0	6	3	0	M1c	1	0	0	0	NA	0	0	NA	54
Hugo_Pt15	SRR3083845	SRR3083846	melanoma	hugo	200.823	5567	5090	47	33	184	213	620	4352	4344	0	8	9504	9504	0	0	476	24	234	218	3592	3307	0	285	3012	3006	0	6	4906	4906	0	0	6	6	0	M1b	1	0	0	0	NA	1	1	NA	980
Hugo_Pt16	SRR4289721	SRR4289720	melanoma	hugo	385.72	4196	3893	44	17	82	160	559	3818	3805	0	13	5283	5283	0	0	306	2	178	126	2523	2385	0	138	1904	1894	0	10	4165	4165	0	0	4	5	0	M1b	1	0	0	0	NA	0	0	NA	186
Hugo_Pt17	SRR4289723	SRR4289722	melanoma	hugo	173.605	6095	5605	80	27	156	227	878	4878	4873	0	5	4968	4968	0	0	495	26	246	223	3871	3615	0	256	3938	3931	0	7	5752	5752	0	0	6	5	0	M1a	1	0	0	0	NA	0	0	NA	953
Hugo_Pt18	SRR3083859	SRR3083860	melanoma	hugo	181.098	3280	2964	45	23	101	147	320	2210	2206	0	4	2825	2825	0	0	352	54	160	138	1648	1607	0	41	2007	2005	0	2	2992	2992	0	0	6	6	0	M1c	1	0	0	0	NA	1	1	NA	1081
Hugo_Pt19	SRR3083847	SRR3083848	melanoma	hugo	172.744	5623	5390	33	15	96	89	640	5306	5282	0	24	6411	6411	0	0	248	24	102	122	3855	3610	0	245	4660	4657	0	3	5638	5638	0	0	6	6	0	M1c	1	0	0	0	NA	1	1	NA	1060
Hugo_Pt2	SRR3083839	SRR3083840	melanoma	hugo	183.494	15019	14684	49	16	128	142	1925	14947	14942	0	5	14793	14793	0	0	317	5	145	167	11911	11339	0	572	11771	11765	0	6	14059	14059	0	0	6	5	0	M1c	1	0	0	0	NA	1	1	NA	927
Hugo_Pt20	SRR3083872	SRR3083873	melanoma	hugo	180.337	4322	3903	62	22	144	191	606	3836	3831	0	5	5658	5658	0	0	416	20	200	196	2234	2129	0	105	1235	1233	0	2	2811	2811	0	0	6	3	0	M1c	1	0	0	0	NA	0	0	NA	337
Hugo_Pt21	SRR3083861	SRR3083862	melanoma	hugo	179.497	2178	1965	38	7	70	98	254	1580	1577	0	3	1622	1622	0	0	206	13	96	97	1078	1034	0	44	6793	6783	0	10	2660	2660	0	0	6	3	0	M1b	1	0	0	0	NA	1	1	NA	945
Hugo_Pt22	SRR3083878	SRR3083879	melanoma	hugo	175.097	1609	1378	28	11	91	101	202	1400	1388	0	12	2666	2666	0	0	237	17	105	115	657	619	0	38	320	315	0	5	1375	1375	0	0	6	3	0	M1c	1	0	0	0	NA	0	0	NA	182
Hugo_Pt23	SRR3083874	SRR3083875	melanoma	hugo	208.104	2646	2298	27	24	117	180	255	2258	2242	0	16	4039	4039	0	0	358	21	197	140	1355	1270	0	85	890	885	0	5	2448	2448	0	0	4	3	0	M1c	1	0	0	0	NA	0	0	NA	103
Hugo_Pt24	SRR3083853	SRR3083854	melanoma	hugo	193.858	4341	3908	77	20	179	157	474	3062	3059	0	3	4471	4471	0	0	479	64	167	248	2244	2103	0	141	11891	11874	0	17	4486	4486	0	0	6	6	0	M1c	1	0	0	0	NA	1	1	NA	974
Hugo_Pt25	SRR3083880	SRR3083881	melanoma	hugo	190.583	1748	1362	49	12	129	196	133	1155	1142	0	13	1899	1899	0	0	363	23	188	152	697	643	0	54	1551	1543	0	8	2154	2154	0	0	5	6	0	M1c	1	0	0	0	NA	0	0	NA	262
Hugo_Pt26	SRR3083843	SRR3083844	melanoma	hugo	192.391	8485	8092	42	23	151	177	1108	7813	7806	0	7	10152	10152	0	0	379	23	184	172	4551	4276	0	275	2227	2226	0	1	5386	5386	0	0	6	6	0	M1c	1	0	0	0	NA	1	1	NA	1336
Hugo_Pt27	SRR4289725;SRR4289726	SRR4289724;SRR4289724	melanoma	hugo	201.666	21063.5	20757.5	29.5	15.5	117.5	143.5	2515	11943.5	11922.5	0	21	12560.5	12560.5	0	0	292	20.5	141	130.5	13491	11736	0	1755	19331	19316.5	0	14.5	21265.5	21265.5	0	0	6	6	0	M1c	1	0	0	0	NA	1	1	NA	548
Hugo_Pt28	SRR3083851	SRR3083852	melanoma	hugo	186.723	3017	2689	49	19	108	152	537	2646	2640	0	6	6247	6247	0	0	328	10	164	154	400	388	0	12	170	168	0	2	894	894	0	0	6	6	0	M1c	1	0	0	0	NA	1	1	NA	439
Hugo_Pt29	SRR3083876	SRR3083877	melanoma	hugo	186.302	2153	1645	75	34	190	209	265	1596	1593	0	3	2779	2779	0	0	504	28	229	247	882	847	0	35	738	735	0	3	1808	1808	0	0	5	6	0	M1c	1	0	0	0	NA	0	0	NA	269
Hugo_Pt3	SRR3083841	SRR3083842	melanoma	hugo	149.708	8113	7232	59	41	189	592	1204	6281	6276	0	5	6627	6627	0	0	877	13	628	236	5253	5044	0	209	6600	6595	0	5	8002	8002	0	0	6	3	0	M1c	1	0	0	0	NA	1	1	NA	691
Hugo_Pt30	SRR4289728	SRR4289727	melanoma	hugo	181.146	3734	3532	39	11	61	91	567	3499	3493	0	6	4612	4612	0	0	200	6	97	97	1949	1718	0	231	685	683	0	2	2585	2585	0	0	5	5	0	M1c	1	0	0	0	NA	0	0	NA	100
Hugo_Pt31	SRR4289730	SRR4289729	melanoma	hugo	227.955	5816	5368	42	41	143	222	647	4860	4835	0	25	5831	5831	0	0	474	57	245	172	3268	2905	0	363	3199	3196	0	3	4794	4794	0	0	6	6	0	M1c	1	0	0	0	NA	0	0	NA	704
Hugo_Pt32	SRR4289732	SRR4289731	melanoma	hugo	178.405	2447	2166	37	21	94	129	276	1752	1741	0	11	2196	2196	0	0	277	23	135	119	1214	1084	0	130	2252	2247	0	5	2607	2607	0	0	6	6	0	M1c	1	0	0	0	NA	0	0	NA	171
Hugo_Pt33	SRR4289734	SRR4289733	melanoma	hugo	288.471	5150	4910	22	18	96	104	711	4777	4750	0	27	6447	6447	0	0	240	9	117	114	2405	2039	0	366	1232	1229	0	3	3517	3517	0	0	6	6	0	M1a	1	0	0	0	NA	1	1	NA	2177
Hugo_Pt34	SRR4289736	SRR4289735	melanoma	hugo	192.724	1409	917	57	30	132	273	121	754	751	0	3	1205	1205	0	0	490	23	290	177	292	266	0	26	5000	4987	0	13	1636	1636	0	0	6	6	0	M1c	1	0	0	0	NA	1	1	NA	418
Hugo_Pt35	SRR4289738	SRR4289737	melanoma	hugo	197.024	3154	2846	60	16	111	121	350	2373	2364	0	9	2931	2931	0	0	297	11	126	160	1746	1414	0	332	3462	3455	0	7	3385	3385	0	0	6	6	0	M1c	1	0	0	0	NA	1	1	NA	427
Hugo_Pt36	SRR4289740	SRR4289739	melanoma	hugo	180.103	1545	1227	33	20	102	163	115	1015	1011	0	4	1760	1760	0	0	322	24	171	127	604	519	0	85	1463	1457	0	6	1607	1607	0	0	6	3	0	M1a	1	0	0	0	NA	0	0	NA	837
Hugo_Pt37	SRR4289742	SRR4289741	melanoma	hugo	180.528	4885	4628	31	20	81	125	583	4445	4430	0	15	5035	5035	0	0	249	12	134	103	3038	2588	0	450	3212	3211	0	1	4384	4384	0	0	4	6	0	M1c	1	0	0	0	NA	1	1	NA	364
Hugo_Pt38	SRR4289744	SRR4289743	melanoma	hugo	215.46	1516	1226	47	13	105	125	100	1179	1153	0	26	2260	2260	0	0	301	24	131	146	135	128	0	7	145	140	0	5	840	840	0	0	4	6	0	M1c	1	0	0	0	NA	1	1	NA	448
Hugo_Pt4	SRR3083837	SRR3083838	melanoma	hugo	175.667	28917	28505	44	39	124	205	3853	27548	27511	0	37	33130	33130	0	0	411	11	235	165	21552	19782	0	1770	20535	20514	0	21	26103	26103	0	0	6	5	0	M1c	1	0	0	0	NA	1	1	NA	948
Hugo_Pt5	SRR3083857	SRR3083858	melanoma	hugo	200.041	3786	3378	28	46	102	232	380	3269	3259	0	10	3980	3980	0	0	433	29	289	115	2008	1893	0	115	3122	3113	0	9	3512	3512	0	0	6	3	0	M1c	1	0	0	0	NA	1	1	NA	439
Hugo_Pt6	SRR3083863	SRR3083864	melanoma	hugo	174.274	2337	2094	48	15	96	84	262	2010	2000	0	10	3032	3032	0	0	251	17	95	139	1313	1241	0	72	2643	2635	0	8	2930	2930	0	0	4	6	0	M1c	1	0	0	0	NA	1	1	NA	882
Hugo_Pt7	SRR3083870	SRR3083871	melanoma	hugo	186.654	9775	9388	49	22	124	192	1223	9271	9268	0	3	10590	10590	0	0	395	22	200	173	6486	6173	0	313	6976	6972	0	4	7951	7951	0	0	5	3	0	M1c	1	0	0	0	NA	0	0	NA	662
Hugo_Pt8	SRR4289715	SRR4289714	melanoma	hugo	161.702	73544	73300	21	16	79	128	14012	66037	65987	0	50	81493	81493	0	0	241	19	131	91	50930	47450	0	3480	35755	35736	0	19	61443	61443	0	0	6	6	0	M1a	1	0	0	0	NA	1	1	NA	NA
Hugo_Pt9	SRR3083849	SRR3083850	melanoma	hugo	179.379	4141	3750	38	27	140	186	507	3382	3379	0	3	5217	5217	0	0	403	35	194	174	1918	1801	0	117	774	774	0	0	2346	2346	0	0	6	6	0	III	1	0	0	0	NA	1	1	NA	1054
IM_001	SRR6504838	SRR6450223	RCC	miao	313.784	497	362	22	7	70	36	27	458	446	0	12	271	271	0	0	137	3	43	91	190	187	0	3	200	192	0	8	2183	2183	0	0	4	3	0	IV	1	0	0	0	NA	1	1	280	379
IM_002	SRR6461147	SRR6450225	RCC	miao	154.684	1131	375	64	64	193	435	109	148	148	0	0	105	105	0	0	758	4	498	256	588	578	0	10	202	196	0	6	1667	1667	0	0	4	3	0	IV	1	0	0	0	NA	1	1	735	735
JB112852	SRR2648125	SRR2648124	NSCLC	rizvi	107.139	1302	544	52	41	148	517	81	418	416	0	2	345	345	0	0	811	66	550	195	143	134	0	9	236	229	0	7	782	782	0	0	6	3	0	IV	1	0	0	0	NA	0	0	99	NA
KA3947	SRR2648127	SRR2648126	NSCLC	rizvi	96.7799	1377	1238	9	10	41	79	341	1181	1175	0	6	1107	1107	0	0	159	23	87	49	732	693	0	39	901	897	0	4	1396	1396	0	0	6	3	0	IV	1	0	0	0	NA	1	1	243	NA
LO3793	SRR2648129	SRR2648128	NSCLC	rizvi	118.855	572	441	19	8	36	68	95	408	403	0	5	351	351	0	0	160	34	74	52	59	58	0	1	65	63	0	2	435	435	0	0	6	3	0	IV	1	0	0	0	NA	0	0	105	NA
LO5004	SRR2648131	SRR2648130	NSCLC	rizvi	104.597	490	290	19	10	55	116	40	295	293	0	2	199	199	0	0	221	25	123	73	76	73	0	3	102	97	0	5	388	388	0	0	6	3	0	IV	1	0	0	0	NA	0	0	189	NA
LSD0167	SRR3341199	SRR3341198	melanoma	snyder	122.78	1840	1721	9	9	42	59	409	1793	1790	0	3	1746	1746	0	0	123	6	66	51	1094	989	0	105	480	480	0	0	1679	1679	0	0	6	3	0	M1c	0	0	1	0	1	NA	1	980	986
LSD2057	SRR3341201	SRR3341200	melanoma	snyder	99.5047	1396	1228	8	5	45	110	272	854	853	0	1	766	766	0	0	277	112	113	52	465	429	0	36	360	360	0	0	841	841	0	0	6	3	0	M1c	0	0	1	0	1	NA	1	448	1205
LSD3484	SRR3341203	SRR3341202	melanoma	snyder	121.611	2507	2425	7	11	31	33	515	2429	2420	0	9	2454	2454	0	0	86	3	45	38	1785	1650	0	135	1918	1916	0	2	2786	2786	0	0	6	3	0	M1c	0	0	1	0	1	NA	1	1059	1059
LSD4691	SRR3341205	SRR3341204	melanoma	snyder	116.304	742	698	6	3	15	20	156	689	683	0	6	3164	3164	0	0	47	3	23	21	92	89	0	3	77	76	0	1	506	506	0	0	6	3	0	M1c	0	0	1	0	1	NA	1	2666	2666
LSD4744	SRR3341207	SRR3341206	melanoma	snyder	129.715	5134	4959	30	10	51	84	1128	4921	4911	0	10	4946	4946	0	0	181	7	93	81	3523	3336	0	187	5393	5389	0	4	5278	5278	0	0	6	3	0	M1c	0	0	1	0	1	NA	1	560	767
LSD6819	SRR3341209	SRR3341208	melanoma	snyder	109.115	1276	1144	17	8	36	71	248	1098	1095	0	3	1008	1008	0	0	164	36	76	52	730	687	0	43	778	775	0	3	1319	1319	0	0	6	3	0	M1c	0	0	1	0	1	NA	1	469	1242
LSDNR1120	SRR3341211	SRR3341210	melanoma	snyder	151.09	2220	2132	9	8	24	47	524	2138	2131	0	7	2332	2332	0	0	90	1	56	33	1255	1158	0	97	636	628	0	8	2062	2062	0	0	5	3	0	M1a	0	0	1	0	0	NA	0	1680	1680
LSDNR1650	SRR3341213	SRR3341212	melanoma	snyder	117.37	408	260	29	3	58	58	41	251	250	0	1	247	247	0	0	166	21	60	85	102	99	0	3	366	361	0	5	601	601	0	0	6	3	0	M1c	0	0	1	0	0	NA	0	511	986
LSDNR3086	SRR3341215	SRR3341214	melanoma	snyder	102.73	845	699	12	7	41	86	120	366	365	0	1	287	287	0	0	241	100	90	51	174	165	0	9	233	228	0	5	506	506	0	0	6	3	0	M1c	0	0	1	0	0	NA	0	945	950
LSDNR9298	SRR3341217	SRR3341216	melanoma	snyder	103.621	5342	4782	47	30	126	357	1225	4614	4610	0	4	4890	4890	0	0	588	35	381	172	3300	3022	0	278	1013	1012	0	1	3948	3948	0	0	6	3	0	M1c	0	0	1	0	0	NA	0	1519	1534
M4945	SRR2648133	SRR2648132	NSCLC	rizvi	93.3415	1905	1270	25	28	119	463	292	946	945	0	1	822	822	0	0	737	104	489	144	602	526	0	76	529	529	0	0	957	957	0	0	6	3	0	IV	1	0	0	0	NA	1	1	438	438
MA7027	SRR2648135	SRR2648134	NSCLC	rizvi	98.7295	1103	918	12	9	48	116	220	941	941	0	0	860	860	0	0	209	24	125	60	557	533	0	24	478	476	0	2	1045	1045	0	0	5	3	0	IV	1	0	0	0	NA	0	0	54	NA
Mel21	SRR2672888;SRR2673015;SRR2673095	SRR2672887;SRR2672887;SRR2672887	melanoma	carreno	147.507	2719	1934	32	21	126	477	351	1810	1810	0	1	1609	1609	0	0	632	19	481	133	1280	1192	0	107	1210	1208	0	2	1826	1826	0	0	6	3	0	IIIC	0	0	1	0	NA	NA	0	NA	660
Mel218	SRR2672890	SRR2672973	melanoma	carreno	159.069	4232	3090	65	42	269	766	557	2752	2751	0	1	2456	2456	0	0	1154	59	785	310	1563	1516	0	47	1084	1083	0	1	2043	2043	0	0	6	3	0	IIIC	0	0	1	0	1	NA	1	2191	2191
Mel38	SRR2672866;SRR2673115	SRR2672972;SRR2672972	melanoma	carreno	159.8	1622.5	1447	11	9	56.5	99	219.5	1563.5	1560	0	3.5	1493.5	1493.5	0	0	180.5	15.5	106.5	58.5	993	941	0	52	1498	1491	0	7	1949	1949	0	0	6	4.5	0	IIIC	0	0	1	0	0	NA	0	NA	660
NI9507	SRR2648137	SRR2648136	NSCLC	rizvi	90.5276	721	625	8	2	22	64	136	312	311	0	1	262	262	0	0	186	90	66	30	99	96	0	3	126	123	0	3	372	372	0	0	4	3	0	IV	1	0	0	0	NA	0	0	57	NA
NR1867	SRR3341219	SRR3341218	melanoma	snyder	233.194	1936	1346	43	29	186	332	145	835	826	0	9	1050	1050	0	0	724	159	346	219	155	146	0	9	340	324	0	16	928	928	0	0	4	3	0	M1c	0	0	1	0	0	NA	0	161	548
NR2137	SRR3341221	SRR3341220	melanoma	snyder	102.413	3585	3391	20	6	47	121	674	2954	2950	0	4	2935	2935	0	0	307	123	122	62	2095	1951	0	144	2943	2941	0	2	3146	3146	0	0	6	3	0	M1c	0	0	1	0	0	NA	0	56	292
NR3156	SRR3341223	SRR3341222	melanoma	snyder	198.399	1745	1186	47	28	168	316	101	350	347	0	3	521	521	0	0	734	197	334	203	6	5	0	1	147	142	0	5	460	460	0	0	6	3	0	M1b	0	0	1	0	0	NA	0	77	402
NR3549	SRR3341225	SRR3341224	melanoma	snyder	149.879	2334	2275	8	5	15	31	429	2271	2248	0	23	2277	2277	0	0	98	41	34	23	1323	1184	0	139	1589	1583	0	6	1993	1993	0	0	4	3	0	M1c	0	0	1	0	0	NA	0	112	183
NR4018	SRR3341227	SRR3341226	melanoma	snyder	99.9859	805	681	11	4	39	70	161	703	702	0	1	626	626	0	0	144	21	73	50	421	401	0	20	316	314	0	2	790	790	0	0	6	3	0	M1c	0	0	1	0	0	NA	0	77	110
NR4045	SRR3341229	SRR3341228	melanoma	snyder	128.83	2342	2243	10	8	35	46	445	2272	2266	0	6	2269	2269	0	0	105	6	54	45	1530	1426	0	104	1351	1349	0	2	2434	2434	0	0	6	3	0	M1c	0	0	1	0	0	NA	0	77	621
NR4083	SRR3341231	SRR3341230	melanoma	snyder	101.576	1705	1555	11	8	57	74	345	1374	1373	0	1	2330	2330	0	0	189	46	78	65	931	888	0	43	517	516	0	1	1263	1263	0	0	6	3	0	M1c	0	0	1	0	0	NA	0	73	73
NR4631	SRR3341233	SRR3341232	melanoma	snyder	131.92	5336	5263	8	4	30	31	1130	5250	5242	0	8	5124	5124	0	0	77	3	36	38	4060	3779	0	281	4529	4524	0	5	5965	5965	0	0	6	3	0	M1c	0	0	1	0	0	NA	0	91	183
NR4810	SRR3341235	SRR3341234	melanoma	snyder	131.171	2248	2146	14	8	25	55	437	1894	1880	0	14	1896	1896	0	0	196	94	63	39	1124	988	0	136	1381	1378	0	3	1675	1675	0	0	6	3	0	M1c	0	0	1	0	0	NA	0	84	146
NR4949	SRR3341237	SRR3341236	melanoma	snyder	154.698	3047	2941	9	12	33	52	617	2904	2878	0	26	2904	2904	0	0	150	50	63	37	1728	1532	0	196	6941	6927	0	14	2744	2744	0	0	3	3	0	M1c	0	0	1	0	0	NA	0	161	256
NR5784	SRR3341239	SRR3341238	melanoma	snyder	135.874	627	584	3	1	12	27	65	595	575	0	20	510	510	0	0	91	49	27	15	56	56	0	0	59	57	0	2	434	434	0	0	6	3	0	M1c	0	0	1	0	0	NA	0	77	183
NR6689	SRR3341241	SRR3341240	melanoma	snyder	102.435	457	329	16	7	29	76	61	190	188	0	2	91	91	0	0	181	59	78	44	18	18	0	0	52	51	0	1	273	273	0	0	6	3	0	M1c	0	0	1	0	0	NA	0	77	438
NR6721	SRR3341243	SRR3341242	melanoma	snyder	101.625	1003	788	23	8	50	134	139	763	760	0	3	745	745	0	0	236	27	140	69	390	359	0	31	563	561	0	2	865	865	0	0	6	3	0	M1a	0	0	1	0	0	NA	0	21	292
NR6842	SRR3341245	SRR3341244	melanoma	snyder	100.074	592	453	14	4	41	80	112	156	155	0	1	77	77	0	0	225	92	80	53	12	12	0	0	77	75	0	2	271	271	0	0	6	3	0	M1c	0	0	1	0	0	NA	0	84	292
NR8727	SRR3341247	SRR3341246	melanoma	snyder	215.034	2258	1479	55	37	269	418	88	488	481	0	7	601	601	0	0	961	233	434	294	23	22	0	1	147	138	0	9	634	634	0	0	6	3	0	M1c	0	0	1	0	0	NA	0	91	146
NR8815	SRR3341249	SRR3341248	melanoma	snyder	106.702	8219	8082	9	12	42	74	1747	7812	7789	0	23	7784	7784	0	0	189	54	86	49	5758	5359	0	399	6974	6972	0	2	7812	7812	0	0	6	3	0	M1b	0	0	1	0	0	NA	0	63	438
NR9341	SRR3341251	SRR3341250	melanoma	snyder	319.058	1805	1458	33	23	114	177	271	1635	1618	0	17	2446	2446	0	0	374	32	196	146	105	101	0	4	213	205	0	8	995	995	0	0	5	3	0	M1a	0	0	1	0	0	NA	0	98	365
NR9445	SRR3341253	SRR3341252	melanoma	snyder	99.093	1900	1713	14	10	58	105	334	1304	1301	0	3	1242	1242	0	0	298	118	111	69	852	788	0	64	1223	1220	0	3	1414	1414	0	0	6	3	0	M1c	0	0	1	1	0	NA	0	56	73
NR9449	SRR3341255	SRR3341254	melanoma	snyder	122.722	1647	1558	16	6	35	32	294	1572	1570	0	2	1586	1586	0	0	88	2	38	48	1028	967	0	61	3451	3448	0	3	1974	1974	0	0	6	3	0	M1c	0	0	1	0	0	NA	0	70	219
NR9521	SRR3341257	SRR3341256	melanoma	snyder	122.103	5024	4929	11	9	28	47	1042	4918	4912	0	6	4908	4908	0	0	97	2	56	39	3585	3366	0	219	4083	4079	0	4	5137	5137	0	0	6	3	0	M1b	0	0	1	0	0	NA	0	84	986
NR9705	SRR3341259	SRR3341258	melanoma	snyder	120.137	370	296	8	6	22	38	35	290	285	0	5	321	321	0	0	82	9	44	29	136	127	0	9	875	868	0	7	772	772	0	0	6	3	0	M1c	0	0	1	0	0	NA	0	203	438
NR9765	SRR3341261	SRR3341260	melanoma	snyder	113.98	3164	788	172	171	453	1580	92	599	598	0	1	936	936	0	0	2411	45	1748	618	295	274	0	21	341	339	0	2	970	970	0	0	6	3	0	M1b	0	0	1	0	0	NA	0	154	767
P16	SRR5149298	SRR5395287	melanoma	gao	138.403	4659	3727	23	53	165	691	933	3673	3661	0	12	3740	3740	0	0	936	24	730	182	2437	2275	0	162	3156	3150	0	6	3299	3299	0	0	6	3	0	NA	0	0	1	0	0	NA	0	NA	NA
P18	SRR5149293	SRR5395288	melanoma	gao	130.771	674	454	22	5	56	137	73	618	610	0	8	483	483	0	0	230	15	140	75	184	177	0	7	199	196	0	3	643	643	0	0	6	3	0	NA	0	0	1	0	0	NA	0	NA	NA
P22	SRR5149294	SRR5395289	melanoma	gao	163.147	1845	523	142	72	323	785	81	320	318	0	2	534	534	0	0	1346	32	854	460	232	226	0	6	2382	2372	0	10	826	826	0	0	6	3	0	NA	0	0	1	0	1	NA	1	NA	NA
P23	SRR5149295	SRR5395290	melanoma	gao	126.504	843	489	32	9	78	235	59	534	524	0	10	439	439	0	0	383	35	241	107	126	121	0	5	282	278	0	4	635	635	0	0	4	3	0	NA	0	0	1	0	0	NA	0	NA	NA
P24	SRR5149301	SRR5395291	melanoma	gao	163.607	5268	5142	17	8	38	63	1119	5196	5172	0	24	5254	5254	0	0	122	2	71	49	3650	3356	0	294	2651	2647	0	4	4787	4787	0	0	6	3	0	NA	0	0	1	0	0	NA	0	NA	NA
P25	SRR5149291	SRR5395292	melanoma	gao	186.803	1379	1203	28	10	60	78	234	1350	1335	0	15	1356	1356	0	0	173	4	85	84	768	721	0	47	779	777	0	2	1381	1381	0	0	6	3	0	NA	0	0	1	0	0	NA	0	NA	NA
P31	SRR5149286	SRR5395293	melanoma	gao	130.993	2312	1865	40	22	120	265	449	1820	1815	0	5	2015	2015	0	0	445	11	285	149	1498	1406	0	92	935	927	0	8	1959	1959	0	0	6	3	0	NA	0	0	1	0	1	NA	1	NA	NA
P37	SRR5149297	SRR5395294	melanoma	gao	143.068	1094	705	54	10	173	152	96	574	568	0	6	791	791	0	0	393	32	160	201	113	108	0	5	79	77	0	2	802	802	0	0	6	3	0	NA	0	0	1	0	1	NA	1	NA	NA
P46	SRR5149300	SRR5395295	melanoma	gao	202.071	1988	1817	24	8	61	78	326	1889	1874	0	15	1902	1902	0	0	189	18	86	85	1130	1011	0	119	1848	1845	0	3	2006	2006	0	0	6	3	0	NA	0	0	1	0	0	NA	0	NA	NA
P47	SRR5149292	SRR5395296	melanoma	gao	228.999	9724	9250	42	47	114	271	2106	8996	8985	0	11	14741	14741	0	0	483	16	317	150	7022	6152	0	870	4935	4929	0	6	8308	8308	0	0	6	3	0	NA	0	0	1	0	0	NA	0	NA	NA
P5	SRR5149289	SRR5395299	melanoma	gao	163.936	2036	1842	29	7	74	84	368	1827	1816	0	11	2043	2043	0	0	201	13	91	97	1157	1087	0	70	710	703	0	7	1853	1853	0	0	6	3	0	NA	0	0	1	0	1	NA	1	NA	NA
P50	SRR5149287	SRR5395297	melanoma	gao	119.37	15514	15192	24	19	76	203	3625	14820	14808	0	12	15462	15462	0	0	335	23	218	94	11994	11271	0	723	11383	11376	0	7	13786	13786	0	0	6	3	0	NA	0	0	1	0	0	NA	0	NA	NA
P54	SRR5149299	SRR5395298	melanoma	gao	142.547	2487	2290	23	6	46	122	487	2422	2409	0	13	2374	2374	0	0	205	10	127	68	1516	1418	0	98	1148	1142	0	6	2226	2226	0	0	6	3	0	NA	0	0	1	0	0	NA	0	NA	NA
P6	SRR5149296	SRR5395300	melanoma	gao	143.647	612	490	15	9	33	65	65	693	684	0	9	571	571	0	0	127	7	74	46	208	199	0	9	228	225	0	3	778	778	0	0	6	3	0	NA	0	0	1	0	0	NA	0	NA	NA
P7	SRR5149290	SRR5395301	melanoma	gao	159.425	610	459	17	3	60	71	42	616	604	0	12	543	543	0	0	143	5	69	69	137	132	0	5	140	132	0	8	832	832	0	0	6	3	0	NA	0	0	1	0	0	NA	0	NA	NA
P9	SRR5149288	SRR5395302	melanoma	gao	176.321	983	552	52	18	145	216	51	651	645	0	6	559	559	0	0	435	25	233	177	145	136	0	9	296	289	0	7	971	971	0	0	5	3	0	NA	0	0	1	0	0	NA	0	NA	NA
Pat02	SRR2773166	SRR2771231	melanoma	vanallen	112.34	1776	832	39	93	80	732	217	825	818	0	7	823	823	0	0	946	4	824	118	587	565	0	22	1067	1062	0	5	1286	1286	0	0	6	3	0	M1c	0	0	1	0	1	NA	1	538	1632
Pat03	SRR2587785	SRR2669737	melanoma	vanallen	102.074	2033	1286	40	34	92	581	366	1137	1136	0	1	1147	1147	0	0	776	40	609	127	265	238	0	27	120	118	0	2	673	673	0	0	6	3	0	M1c	0	0	1	0	0	NA	0	76	100
Pat04	SRR2723814	SRR2775312	melanoma	vanallen	109.574	2080	1756	23	22	56	223	354	1599	1595	0	4	1508	1508	0	0	372	53	243	76	870	773	0	97	1630	1628	0	2	1665	1665	0	0	6	3	0	M1b	0	0	1	0	1	NA	1	646	987
Pat06	SRR2675035	SRR2766685	melanoma	vanallen	103.642	570	518	2	5	13	32	143	515	508	0	7	571	571	0	0	50	1	34	15	325	292	0	33	154	153	0	1	790	790	0	0	6	3	0	M1c	0	0	1	0	0	NA	0	77	161
Pat07	SRR2779374	SRR2701132	melanoma	vanallen	108.942	905	750	16	9	39	91	178	670	670	0	0	624	624	0	0	186	34	100	52	374	334	0	40	437	436	0	1	824	824	0	0	5	3	0	M0	0	0	1	0	1	NA	1	721	1050
Pat08	SRR2773750	SRR2739282	melanoma	vanallen	102.895	1838	1438	25	10	90	275	286	1370	1367	0	3	1295	1295	0	0	414	28	283	103	966	852	0	114	2877	2870	0	7	1730	1730	0	0	6	3	0	M1c	0	0	1	0	0	NA	0	73	140
Pat100	SRR2741440	SRR2743785	melanoma	vanallen	97.2721	2575	2215	30	29	76	225	516	2110	2107	0	3	2063	2063	0	0	377	27	249	101	1522	1331	0	191	1694	1692	0	2	2345	2345	0	0	6	3	0	M1c	0	0	1	0	0	NA	0	111	360
Pat101	SRR2760983	SRR2587681	melanoma	vanallen	94.7571	2183	569	74	77	150	1313	149	339	338	0	1	153	153	0	0	1687	84	1383	220	133	117	0	16	982	978	0	4	945	945	0	0	6	3	0	M1c	0	0	1	0	0	NA	0	77	288
Pat103	SRR2589478	SRR2761780	melanoma	vanallen	97.1615	2588	1766	34	32	98	658	536	1551	1546	0	5	2124	2124	0	0	860	39	690	131	472	403	0	69	124	123	0	1	780	780	0	0	6	3	0	M1c	0	0	1	0	1	NA	1	969	1048
Pat104	SRR2753222	SRR2763711	melanoma	vanallen	99.2296	1041	362	33	38	92	516	43	263	262	0	1	178	178	0	0	721	44	552	125	100	91	0	9	5940	5931	0	9	944	944	0	0	6	3	0	M1c	0	0	1	0	0	NA	0	237	237
Pat105	SRR2589393	SRR2895608	melanoma	vanallen	97.7307	2506	858	60	108	163	1317	228	558	556	0	2	418	418	0	0	1754	103	1435	216	132	123	0	9	52	51	0	1	366	366	0	0	6	3	0	III	0	0	1	0	1	NA	1	690	1047
Pat106	SRR2732125	SRR2712107	melanoma	vanallen	99.2983	286	225	8	10	12	31	17	215	212	0	3	249	249	0	0	60	0	41	19	116	107	0	9	240	238	0	2	634	634	0	0	6	3	0	M1b	0	0	1	0	0	NA	0	137	250
Pat109	SRR2762331	SRR2762344	melanoma	vanallen	108.299	10266	2312	247	614	690	6403	551	1330	1329	0	1	1190	1190	0	0	8175	249	7000	926	956	870	0	86	1114	1110	0	4	1520	1520	0	0	6	3	0	M1b	0	0	1	0	0	NA	0	19	83
Pat11	SRR2773334	SRR2779120	melanoma	vanallen	110.926	8669	8463	15	9	52	130	1967	8331	8324	0	7	8507	8507	0	0	237	31	139	67	5446	4650	0	796	2819	2817	0	2	6373	6373	0	0	6	3	0	M1c	0	0	1	0	0	NA	0	126	790
Pat110	SRR2774559	SRR2698835	melanoma	vanallen	90.2125	23135	22977	19	4	62	73	6120	22558	22496	0	62	21836	21836	0	0	159	1	77	81	17844	14626	0	3218	17200	17192	0	8	23030	23030	0	0	5	3	0	M1b	0	0	1	0	0	NA	0	73	320
Pat113	SRR2661932	SRR2757063	melanoma	vanallen	108.696	1172	1152	3	3	4	10	292	1159	1153	0	6	1258	1258	0	0	21	1	13	7	795	736	0	59	1909	1907	0	2	1562	1562	0	0	6	3	0	M1c	0	0	1	0	1	NA	1	52	301
Pat115	SRR2675269	SRR2779751	melanoma	vanallen	108.442	721	533	25	9	50	104	146	383	380	0	3	370	370	0	0	223	37	112	74	188	175	0	13	3222	3214	0	8	974	974	0	0	5	3	0	M1c	0	0	1	0	0	NA	0	74	145
Pat117	SRR2677533	SRR2779541	melanoma	vanallen	96.9005	3798	3330	37	31	101	299	773	2993	2988	0	5	2859	2859	0	0	556	98	330	128	2235	2076	0	159	2162	2156	0	6	2885	2885	0	0	6	3	0	M1c	0	0	1	0	1	NA	1	182	914
Pat118	SRR2777738	SRR2774637	melanoma	vanallen	105.041	1419	855	34	36	92	402	202	644	643	0	1	525	525	0	0	640	78	436	126	356	322	0	34	456	456	0	0	807	807	0	0	6	3	0	M1c	0	0	1	0	0	NA	0	120	313
Pat119	SRR2727854	SRR2724351	melanoma	vanallen	111.212	1356	1206	27	5	84	34	295	1391	1388	0	3	1153	1153	0	0	153	3	39	111	937	861	0	76	1083	1080	0	3	1588	1588	0	0	6	3	0	III	0	0	1	0	0	NA	0	108	808
Pat121	SRR2588549	SRR2747654	melanoma	vanallen	278.945	39197	1230	2938	5483	5931	23615	116	435	432	0	3	785	785	0	0	38294	198	29237	8859	145	139	0	6	434	429	0	5	1080	1080	0	0	6	3	0	M1c	0	0	1	0	0	NA	0	84	122
Pat123	SRR2679057	SRR2778467	melanoma	vanallen	102.102	3364	2456	63	55	141	649	507	2285	2281	0	4	2274	2274	0	0	947	55	702	190	1671	1541	0	130	1862	1860	0	2	2375	2375	0	0	6	3	0	M1c	0	0	1	0	1	NA	1	544	853
Pat124	SRR2747991	SRR2767000	melanoma	vanallen	104.193	3568	1983	139	128	295	1023	377	1865	1862	0	3	1986	1986	0	0	1613	33	1149	431	1291	1203	0	88	3120	3115	0	5	2317	2317	0	0	6	3	0	M1b	0	0	1	0	0	NA	0	67	146
Pat126	SRR2772336	SRR2780399	melanoma	vanallen	136.031	5504	2901	229	160	566	1648	559	2104	2101	0	3	2109	2109	0	0	2779	202	1801	776	1294	1194	0	100	1718	1715	0	3	2238	2238	0	0	6	3	0	M1b	0	0	1	0	1	NA	1	187	641
Pat127	SRR2772054	SRR2776720	melanoma	vanallen	97.4012	1606	844	48	41	122	551	157	598	597	0	1	503	503	0	0	835	81	590	164	335	319	0	16	4282	4277	0	5	1116	1116	0	0	6	3	0	M1c	0	0	1	0	0	NA	0	84	332
Pat128	SRR2709858	SRR2663870	melanoma	vanallen	106.021	1205	690	51	21	119	324	110	507	505	0	2	429	429	0	0	572	65	345	162	230	212	0	18	2129	2123	0	6	908	908	0	0	3	3	0	M1c	0	0	1	0	0	NA	0	81	113
Pat129	SRR2768297	SRR2710529	melanoma	vanallen	105.08	1350	984	17	16	72	261	295	580	579	0	1	514	514	0	0	473	110	274	89	341	316	0	25	490	490	0	0	836	836	0	0	6	3	0	M1b	0	0	1	0	0	NA	0	68	539
Pat13	SRR2770259	SRR2780020	melanoma	vanallen	105.704	1025	671	27	18	53	256	121	699	696	0	3	535	535	0	0	375	26	270	79	398	345	0	53	536	533	0	3	915	915	0	0	6	3	0	III	0	0	1	0	0	NA	0	104	732
Pat130	SRR2778365	SRR2662805	melanoma	vanallen	95.4678	1898	1130	43	57	114	554	252	959	956	0	3	817	817	0	0	836	74	607	155	592	562	0	30	2866	2863	0	3	1264	1264	0	0	5	3	0	M1c	0	0	1	0	0	NA	0	17	45
Pat131	SRR2780177	SRR2693364	melanoma	vanallen	116.708	10543	1722	478	1047	1021	6275	339	430	428	0	2	660	660	0	0	9048	270	7301	1477	74	70	0	4	120	117	0	3	596	596	0	0	5	3	0	M1c	0	0	1	0	0	NA	0	195	257
Pat132	SRR2674312	SRR2660402	melanoma	vanallen	105.934	6849	3643	183	264	374	2385	1526	2879	2873	0	6	5144	5144	0	0	3257	50	2650	557	2338	2308	0	30	574	574	0	0	2711	2711	0	0	6	3	0	M1c	0	0	1	0	1	NA	1	187	676
Pat133	SRR2670626	SRR2724330	melanoma	vanallen	105.27	6626	1308	253	475	581	4009	323	886	883	0	3	865	865	0	0	5459	142	4486	831	322	284	0	38	247	247	0	0	879	879	0	0	6	3	0	M1b	0	0	1	0	0	NA	0	134	542
Pat135	SRR2731893	SRR2765463	melanoma	vanallen	82.0152	3108	678	308	41	684	1397	231	765	764	0	1	520	520	0	0	2434	4	1439	991	672	650	0	22	609	608	0	1	1155	1155	0	0	6	3	0	M1c	0	0	1	0	0	NA	0	73	81
Pat138	SRR2772131	SRR2766353	melanoma	vanallen	111.174	20691	13771	270	681	657	5312	4302	12910	12908	0	2	15737	15737	0	0	6993	89	5988	916	10128	8267	0	1861	5828	5826	0	2	11223	11223	0	0	6	3	0	M1c	0	0	1	0	1	NA	1	581	1478
Pat139	SRR2684746	SRR2680371	melanoma	vanallen	114.466	6569	5130	58	117	138	1126	1396	5033	5020	0	13	4976	4976	0	0	1457	18	1244	195	4165	4017	0	148	5789	5780	0	9	5690	5690	0	0	6	3	0	M1c	0	0	1	0	0	NA	0	46	99
Pat14	SRR2774418	SRR2722193	melanoma	vanallen	116.983	775	482	23	11	98	161	44	436	432	0	4	424	424	0	0	297	24	164	109	133	114	0	19	186	182	0	4	676	676	0	0	6	3	0	M1c	0	0	1	0	0	NA	0	84	163
Pat140	SRR2777977	SRR2775071	melanoma	vanallen	90.7675	4701	2489	98	132	240	1742	669	1413	1411	0	2	1319	1319	0	0	2471	268	1867	336	1029	971	0	58	1310	1307	0	3	1555	1555	0	0	6	3	0	M1c	0	0	1	0	0	NA	0	114	492
Pat143	SRR2712344	SRR2587942	melanoma	vanallen	107.548	9451	3811	250	578	545	4267	899	3486	3481	0	5	3525	3525	0	0	5735	102	4842	791	2829	2417	0	412	4016	4008	0	8	3821	3821	0	0	5	3	0	M1c	0	0	1	0	0	NA	0	90	153
Pat147	SRR2774969	SRR2768007	melanoma	vanallen	98.8219	3128	1720	46	81	138	1143	525	1708	1705	0	3	1705	1705	0	0	1435	25	1226	184	839	714	0	125	284	282	0	2	1273	1273	0	0	6	3	0	M1a	0	0	1	0	0	NA	0	120	224
Pat148	SRR2753967	SRR2741956	melanoma	vanallen	116.578	16729	4674	561	963	1273	9258	1994	1056	1053	0	3	911	911	0	0	12816	797	10201	1818	549	544	0	5	820	819	0	1	1039	1039	0	0	6	3	0	M1c	0	0	1	0	0	NA	0	48	84
Pat15	SRR2768790	SRR2729983	melanoma	vanallen	107.975	1465	1169	26	11	64	195	233	1103	1099	0	4	1057	1057	0	0	315	23	204	88	710	621	0	89	4215	4210	0	5	1479	1479	0	0	6	3	0	M1c	0	0	1	0	0	NA	0	31	50
Pat151	SRR2775456	SRR2891891	melanoma	vanallen	103.456	12103	4102	298	783	761	6159	1325	3415	3415	0	0	4779	4779	0	0	8124	132	6934	1058	1983	1633	0	350	1404	1397	0	7	2526	2526	0	0	6	3	0	M1c	0	0	1	0	0	NA	0	106	204
Pat157	SRR2706574	SRR2769007	melanoma	vanallen	106.548	13337	1085	550	1488	1196	9018	231	680	678	0	2	542	542	0	0	12380	135	10504	1741	386	329	0	57	1219	1218	0	1	989	989	0	0	4	3	0	M1c	0	0	1	0	0	NA	0	53	86
Pat159	SRR2777240	SRR2755533	melanoma	vanallen	113.571	22855	8994	557	1212	1477	10615	3794	1820	1820	0	0	1942	1942	0	0	15367	1555	11805	2007	1252	1181	0	71	1538	1538	0	0	1794	1794	0	0	5	3	0	M1b	0	0	1	0	0	NA	0	100	842
Pat16	SRR2717684	SRR2768667	melanoma	vanallen	111.679	8397	8139	23	8	76	151	1938	7858	7849	0	9	7904	7904	0	0	289	31	160	98	5876	5003	0	873	5884	5880	0	4	7792	7792	0	0	6	3	0	M1b	0	0	1	0	0	NA	0	84	811
Pat160	SRR2778175	SRR2776026	melanoma	vanallen	86.5509	9446	2020	389	749	812	5476	873	385	385	0	0	173	173	0	0	7812	393	6225	1194	159	150	0	9	569	569	0	0	633	633	0	0	5	3	0	M1c	0	0	1	0	0	NA	0	81	152
Pat162	SRR2692147	SRR2744628	melanoma	vanallen	130.753	6967	810	299	598	689	4571	101	373	370	0	3	339	339	0	0	6263	111	5170	982	150	132	0	18	2995	2992	0	3	987	987	0	0	6	3	0	M1c	0	0	1	0	0	NA	0	78	211
Pat163	SRR2740217	SRR2673444	melanoma	vanallen	115.503	11598	4325	381	568	853	5471	2038	611	611	0	0	406	406	0	0	8070	838	6012	1220	252	250	0	2	273	272	0	1	606	606	0	0	6	3	0	M1c	0	0	1	0	0	NA	0	76	749
Pat165	SRR2589694	SRR2772456	melanoma	vanallen	82.5731	19276	1835	1397	2211	2585	11248	846	367	367	0	0	244	244	0	0	17763	320	13463	3980	321	276	0	45	296	293	0	3	721	721	0	0	6	3	0	M1c	0	0	1	0	0	NA	0	95	115
Pat166	SRR2665040	SRR2588273	melanoma	vanallen	83.0501	6838	552	453	642	806	4385	192	471	471	0	0	116	116	0	0	6358	74	5025	1259	218	188	0	30	298	294	0	4	727	727	0	0	6	3	0	M1c	0	0	1	0	0	NA	0	76	77
Pat167	SRR2767414	SRR2689026	melanoma	vanallen	114.827	3974	486	157	313	382	2636	51	427	424	0	3	264	264	0	0	3553	70	2944	539	131	114	0	17	323	322	0	1	630	630	0	0	6	3	0	M1c	0	0	1	0	0	NA	0	84	408
Pat168	SRR2778705	SRR2766211	melanoma	vanallen	111.653	12671	1653	515	1146	1130	8227	382	1004	1004	0	0	899	899	0	0	11221	204	9374	1643	669	636	0	33	4476	4468	0	8	1594	1594	0	0	5	3	0	M1c	0	0	1	0	0	NA	0	67	67
Pat17	SRR2770067	SRR2771689	melanoma	vanallen	104.113	1275	1077	18	10	40	130	232	999	995	0	4	954	954	0	0	221	25	139	57	691	610	0	81	853	849	0	4	1366	1366	0	0	6	3	0	M1c	0	0	1	0	0	NA	0	85	205
Pat170	SRR2679085	SRR2779333	melanoma	vanallen	109.417	8220	890	261	665	531	5873	285	797	796	0	1	708	708	0	0	7382	48	6542	792	577	563	0	14	526	525	0	1	1037	1037	0	0	6	3	0	M1c	0	0	1	0	0	NA	0	97	108
Pat171	SRR2747280	SRR2731589	melanoma	vanallen	110.376	22208	2050	1247	2288	2339	14284	720	747	747	0	0	313	313	0	0	20544	393	16571	3580	232	203	0	29	367	366	0	1	808	808	0	0	4	3	0	M1a	0	0	1	0	0	NA	0	85	466
Pat174	SRR2891925	SRR2766020	melanoma	vanallen	90.2547	2439	2169	17	16	33	204	664	2166	2159	0	7	2156	2156	0	0	278	9	220	49	1624	1585	0	39	1268	1266	0	2	2123	2123	0	0	6	3	0	M1a	0	0	1	0	1	NA	1	134	688
Pat175	SRR2770550	SRR2669057	melanoma	vanallen	147.053	690	453	16	15	43	163	75	490	482	0	8	559	559	0	0	238	0	179	59	267	255	0	12	305	303	0	2	850	850	0	0	6	3	0	M1a	0	0	1	0	0	NA	0	90	90
Pat18	SRR2780332	SRR2767840	melanoma	vanallen	110.672	391	248	10	6	33	94	40	285	283	0	2	208	208	0	0	158	17	99	42	122	110	0	12	155	154	0	1	605	605	0	0	6	3	0	III	0	0	1	0	0	NA	0	112	798
Pat19	SRR2779901	SRR2685939	melanoma	vanallen	104.866	2652	2375	15	18	64	180	482	2246	2238	0	8	2218	2218	0	0	299	28	194	77	1685	1414	0	271	1483	1479	0	4	2494	2494	0	0	6	3	0	M1c	0	0	1	0	0	NA	0	21	175
Pat21	SRR2702801	SRR2767209	melanoma	vanallen	112.462	4990	4794	18	9	49	120	1239	4593	4592	0	1	5672	5672	0	0	221	32	124	65	1751	1496	0	255	462	461	0	1	2123	2123	0	0	4	3	0	M1c	0	0	1	0	1	NA	1	558	676
Pat24	SRR2663954	SRR2587502	melanoma	vanallen	102.806	592	316	19	16	64	177	54	209	207	0	2	146	146	0	0	289	34	185	70	84	72	0	12	433	430	0	3	412	412	0	0	6	3	0	M1b	0	0	1	0	1	NA	1	658	971
Pat25	SRR2589158	SRR2682770	melanoma	vanallen	100.375	4358	490	97	290	271	3210	97	277	276	0	1	271	271	0	0	3895	30	3499	366	163	159	0	4	1071	1068	0	3	755	755	0	0	6	3	0	M1c	0	0	1	0	0	NA	0	67	325
Pat27	SRR2681131	SRR2756594	melanoma	vanallen	97.3105	730	313	16	24	56	321	48	290	285	0	5	228	228	0	0	432	17	345	70	117	106	0	11	237	235	0	2	566	566	0	0	6	3	0	M1c	0	0	1	0	0	NA	0	139	1379
Pat28	SRR2771788	SRR2682026	melanoma	vanallen	98.1436	8127	6844	35	80	104	1064	2024	2158	2154	0	4	3442	3442	0	0	1302	24	1140	138	1517	1423	0	94	5653	5650	0	3	10184	10184	0	0	6	3	0	M1c	0	0	1	0	0	NA	0	77	1184
Pat29	SRR2773533	SRR2766529	melanoma	vanallen	101.788	2647	2368	16	11	44	208	689	580	576	0	4	527	527	0	0	285	7	219	59	323	315	0	8	2662	2658	0	4	3109	3109	0	0	6	3	0	M1c	0	0	1	0	1	NA	1	341	1326
Pat32	SRR2689326	SRR2740729	melanoma	vanallen	121.455	6860	3187	223	350	521	2579	703	2858	2853	0	5	3067	3067	0	0	3714	50	2929	735	2343	2064	0	279	2636	2630	0	6	3617	3617	0	0	5	3	0	M1c	0	0	1	0	0	NA	0	70	147
Pat33	SRR2677297	SRR2668081	melanoma	vanallen	97.6674	1782	1052	22	46	73	589	251	336	333	0	3	252	252	0	0	737	12	634	91	153	149	0	4	1946	1944	0	2	1650	1650	0	0	6	3	0	M1c	0	0	1	0	0	NA	0	211	211
Pat36	SRR2771331	SRR2665211	melanoma	vanallen	105.146	418	216	21	8	34	139	8	245	241	0	4	240	240	0	0	208	6	147	55	70	66	0	4	1666	1664	0	2	453	453	0	0	6	3	0	M1c	0	0	1	0	0	NA	0	41	54
Pat37	SRR2773626	SRR2763304	melanoma	vanallen	103.027	898	729	16	12	26	115	141	712	703	0	9	701	701	0	0	172	4	127	41	431	384	0	47	1740	1733	0	7	1123	1123	0	0	6	3	0	M1c	0	0	1	0	0	NA	0	23	70
Pat38	SRR2661602	SRR2764748	melanoma	vanallen	106.102	6218	6166	9	3	19	21	2091	6023	6013	0	10	6475	6475	0	0	54	4	24	26	3244	2908	0	336	421	419	0	2	3951	3951	0	0	6	3	0	M1c	0	0	1	0	1	NA	1	302	1539
Pat39	SRR2757601	SRR2698019	melanoma	vanallen	98.6982	6689	627	228	565	499	4770	160	463	463	0	0	262	262	0	0	6128	66	5337	725	279	260	0	19	231	231	0	0	786	786	0	0	6	3	0	M1b	0	0	1	0	1	NA	1	1487	1487
Pat40	SRR2663198	SRR2681066	melanoma	vanallen	108.72	5425	664	161	366	425	3809	131	183	182	0	1	1317	1317	0	0	4843	80	4181	582	219	207	0	12	510	506	0	4	875	875	0	0	6	3	0	M1c	0	0	1	0	0	NA	0	34	34
Pat41	SRR2775592	SRR2779792	melanoma	vanallen	94.6061	1631	1502	16	3	44	66	346	1578	1576	0	2	1390	1390	0	0	127	1	66	60	1201	989	0	212	1379	1373	0	6	1967	1967	0	0	6	3	0	M1c	0	0	1	0	0	NA	0	54	128
Pat43	SRR2776798	SRR2661956	melanoma	vanallen	97.6176	2068	753	39	90	121	1065	194	688	688	0	0	598	598	0	0	1338	30	1149	159	435	379	0	56	434	430	0	4	986	986	0	0	6	3	0	M1b	0	0	1	0	0	NA	0	37	37
Pat44	SRR2588166	SRR2740097	melanoma	vanallen	101.715	1388	759	18	43	58	510	174	454	450	0	4	392	392	0	0	638	7	555	76	287	273	0	14	1236	1232	0	4	1121	1121	0	0	6	3	0	M1c	0	0	1	0	0	NA	0	62	271
Pat45	SRR2677161	SRR2776116	melanoma	vanallen	102.814	4715	4421	26	9	50	209	931	4276	4263	0	13	4218	4218	0	0	305	17	213	75	3267	2782	0	485	8366	8358	0	8	5003	5003	0	0	6	3	0	M1c	0	0	1	0	0	NA	0	61	89
Pat46	SRR2679013	SRR2770912	melanoma	vanallen	106.425	1653	1287	37	22	76	231	263	1249	1248	0	1	1136	1136	0	0	395	36	249	110	783	652	0	131	1326	1323	0	3	1479	1479	0	0	6	3	0	M1b	0	0	1	0	0	NA	0	36	160
Pat47	SRR2772900	SRR2660259	melanoma	vanallen	96.2517	722	629	15	4	27	47	134	762	762	0	0	531	531	0	0	95	5	48	42	426	357	0	69	575	571	0	4	912	912	0	0	6	3	0	M1c	0	0	1	0	1	NA	1	1106	1106
Pat49	SRR2777655	SRR2774803	melanoma	vanallen	99.1772	3516	3290	19	8	44	155	711	3098	3094	0	4	2979	2979	0	0	276	53	161	62	2387	2059	0	328	2351	2349	0	2	3044	3044	0	0	5	3	0	M1c	0	0	1	0	1	NA	1	163	1034
Pat50	SRR2774183	SRR2696332	melanoma	vanallen	93.3111	2998	2216	25	61	105	591	450	2011	2010	0	1	2028	2028	0	0	814	38	649	127	1596	1376	0	220	2097	2095	0	2	2478	2478	0	0	6	3	0	M1c	0	0	1	0	0	NA	0	65	65
Pat54	SRR2726249	SRR2674207	melanoma	vanallen	93.7009	3814	3665	3	4	27	115	859	3559	3556	0	3	3542	3542	0	0	161	16	115	30	2825	2603	0	222	3864	3861	0	3	3835	3835	0	0	6	3	0	M1c	0	0	1	0	0	NA	0	81	208
Pat55	SRR2777872	SRR2776322	melanoma	vanallen	92.1088	2763	2258	23	31	60	391	514	2064	2059	0	5	2018	2018	0	0	539	42	416	81	1611	1347	0	264	2088	2085	0	3	2353	2353	0	0	6	3	0	M1c	0	0	1	0	0	NA	0	78	193
Pat56	SRR2774324	SRR2763056	melanoma	vanallen	96.8465	650	335	20	18	51	226	66	362	358	0	4	266	266	0	0	327	18	242	67	148	131	0	17	504	502	0	2	617	617	0	0	6	3	0	M1c	0	0	1	0	0	NA	0	96	235
Pat57	SRR2778237	SRR2685662	melanoma	vanallen	90.2794	1045	479	22	22	57	465	112	378	376	0	2	254	254	0	0	609	50	482	77	193	174	0	19	271	268	0	3	616	616	0	0	6	3	0	III	0	0	1	0	0	NA	0	68	250
Pat58	SRR2767760	SRR2771877	melanoma	vanallen	91.6756	5336	4975	17	16	57	271	1547	4564	4563	0	1	6160	6160	0	0	412	59	280	73	2313	1997	0	316	2289	2288	0	1	2764	2764	0	0	6	3	0	III	0	0	1	0	0	NA	0	99	652
Pat59	SRR2779219	SRR2768161	melanoma	vanallen	98.3541	1731	1418	21	14	46	232	295	1309	1307	0	2	1211	1211	0	0	352	46	240	66	915	782	0	133	477	476	0	1	1302	1302	0	0	5	3	0	M1b	0	0	1	0	0	NA	0	76	224
Pat60	SRR2776179	SRR2686494	melanoma	vanallen	88.7271	2853	2757	6	6	36	48	756	2955	2950	0	5	2590	2590	0	0	100	5	53	42	2270	2081	0	189	1880	1878	0	2	2897	2897	0	0	6	3	0	M1c	0	0	1	0	0	NA	0	89	272
Pat62	SRR2678485	SRR2770971	melanoma	vanallen	91.2576	6050	5302	51	49	177	471	1315	5045	5042	0	3	5442	5442	0	0	774	30	521	223	3771	3304	0	467	3938	3933	0	5	4891	4891	0	0	6	3	0	M1c	0	0	1	0	0	NA	0	77	602
Pat63	SRR2770409	SRR2660711	melanoma	vanallen	92.8623	2179	1673	23	27	75	381	394	1182	1182	0	0	1084	1084	0	0	522	25	401	96	1085	976	0	109	1376	1375	0	1	1833	1833	0	0	5	3	0	III	0	0	1	0	1	NA	1	718	1039
Pat64	SRR2589808	SRR2676240	melanoma	vanallen	96.7562	3884	3550	8	17	52	257	701	3313	3311	0	2	3248	3248	0	0	398	62	278	58	2481	2170	0	311	3286	3281	0	5	3425	3425	0	0	6	3	0	M1c	0	0	1	0	0	NA	0	69	106
Pat66	SRR2693653	SRR2674183	melanoma	vanallen	99.1839	1541	1299	20	10	45	167	341	1266	1264	0	2	1162	1162	0	0	250	21	166	63	921	854	0	67	2501	2497	0	4	1563	1563	0	0	4	3	0	III	0	0	1	0	1	NA	1	598	653
Pat67	SRR2771975	SRR2776513	melanoma	vanallen	94.7036	638	380	10	13	58	177	77	184	182	0	2	100	100	0	0	294	46	184	64	77	60	0	17	369	366	0	3	429	429	0	0	6	3	0	M1c	0	0	1	0	0	NA	0	79	79
Pat70	SRR2769286	SRR2779613	melanoma	vanallen	93.1186	1003	612	9	24	44	314	89	497	496	0	1	384	384	0	0	432	48	333	51	288	250	0	38	722	721	0	1	665	665	0	0	6	3	0	M1c	0	0	1	0	0	NA	0	15	532
Pat71	SRR2670951	SRR2709391	melanoma	vanallen	96.9639	2745	2442	13	21	53	216	708	2228	2226	0	2	2503	2503	0	0	339	44	231	64	835	708	0	127	267	266	0	1	1050	1050	0	0	6	3	0	M1c	0	0	1	0	0	NA	0	98	137
Pat73	SRR2772697	SRR2774871	melanoma	vanallen	89.1063	1142	1083	0	8	9	42	303	959	953	0	6	961	961	0	0	59	1	49	9	696	647	0	49	1090	1088	0	2	1411	1411	0	0	6	3	0	M1c	0	0	1	0	1	NA	1	408	442
Pat74	SRR2680970	SRR2770768	melanoma	vanallen	89.6346	2672	2308	13	17	55	279	541	2232	2229	0	3	2151	2151	0	0	389	27	294	68	1766	1587	0	179	2175	2166	0	9	2474	2474	0	0	6	3	0	M1c	0	0	1	0	0	NA	0	80	193
Pat76	SRR2668212	SRR2771101	melanoma	vanallen	92.3792	1047	892	9	6	30	110	217	819	817	0	2	770	770	0	0	174	21	114	39	605	531	0	74	839	837	0	2	1173	1173	0	0	6	3	0	M1c	0	0	1	0	0	NA	0	70	139
Pat77	SRR2772803	SRR2666252	melanoma	vanallen	99.8152	2602	1830	30	42	92	608	433	1630	1629	0	1	1502	1502	0	0	828	66	647	115	1200	1049	0	151	1221	1217	0	4	1891	1891	0	0	6	3	0	III	0	0	1	0	1	NA	1	241	1029
Pat78	SRR2589276	SRR2663174	melanoma	vanallen	97.5959	60056	3059	3658	6980	7198	39161	1165	179	179	0	0	223	223	0	0	57372	402	46140	10830	1624	1339	0	285	267	266	0	1	1461	1461	0	0	6	3	0	M1c	0	0	1	0	0	NA	0	38	38
Pat79	SRR2757072	SRR2777128	melanoma	vanallen	95.1441	1213	1188	1	3	6	15	298	1158	1150	0	8	1189	1189	0	0	29	6	16	7	857	773	0	84	1139	1132	0	7	1492	1492	0	0	6	3	0	M1b	0	0	1	0	1	NA	1	405	801
Pat80	SRR2765066	SRR2677014	melanoma	vanallen	97.1712	1355	1045	10	10	42	248	220	826	824	0	2	785	785	0	0	352	52	250	50	557	471	0	86	1513	1511	0	2	1088	1088	0	0	6	3	0	M1c	0	0	1	0	1	NA	1	182	724
Pat81	SRR2707236	SRR2773005	melanoma	vanallen	96.4017	519	491	3	1	10	14	110	514	504	0	10	513	513	0	0	29	2	14	13	256	224	0	32	536	533	0	3	784	784	0	0	6	3	0	M1a	0	0	1	0	0	NA	0	76	628
Pat82	SRR2682345	SRR2663978	melanoma	vanallen	94.1161	2369	1962	23	9	55	320	436	1784	1783	0	1	1711	1711	0	0	452	52	326	74	1289	1116	0	173	1989	1985	0	4	2047	2047	0	0	6	3	0	M1c	0	0	1	0	0	NA	0	75	104
Pat83	SRR2703695	SRR2718333	melanoma	vanallen	99.4864	860	447	36	20	88	269	41	405	404	0	1	285	285	0	0	441	42	280	119	112	97	0	15	131	128	0	3	491	491	0	0	5	3	0	M1c	0	0	1	0	0	NA	0	107	1027
Pat85	SRR2777326	SRR2778512	melanoma	vanallen	98.9732	1591	1217	18	15	109	232	294	967	964	0	3	1456	1456	0	0	407	53	239	115	207	194	0	13	79	78	0	1	520	520	0	0	4	3	0	M1c	0	0	1	0	0	NA	0	83	458
Pat86	SRR2587585	SRR2680027	melanoma	vanallen	89.5469	1153	516	24	40	63	510	88	298	297	0	1	211	211	0	0	685	65	539	81	151	132	0	19	292	288	0	4	503	503	0	0	6	3	0	M1a	0	0	1	0	0	NA	0	153	293
Pat88	SRR2765304	SRR2771490	melanoma	vanallen	92.1633	11775	11298	16	26	67	368	2653	6489	6486	0	3	6847	6847	0	0	530	59	390	81	8036	6747	0	1289	9200	9196	0	4	11473	11473	0	0	6	3	0	M1c	0	0	1	0	1	NA	1	665	989
Pat90	SRR2588053	SRR2763956	melanoma	vanallen	94.6107	1568	1108	25	27	69	339	222	1056	1053	0	3	999	999	0	0	486	28	365	93	724	657	0	67	2292	2290	0	2	1406	1406	0	0	6	3	0	M1c	0	0	1	0	1	NA	1	669	1005
Pat92	SRR2775168	SRR2765167	melanoma	vanallen	112.027	13702	212	382	1215	837	11056	55	240	239	0	1	179	179	0	0	13503	6	12278	1219	205	202	0	3	77	75	0	2	452	452	0	0	6	3	0	M1c	0	0	1	0	0	NA	0	84	123
Pat98	SRR2588422	SRR2730944	melanoma	vanallen	98.2211	364	166	38	6	81	73	36	257	257	0	0	113	113	0	0	200	4	78	118	98	85	0	13	212	210	0	2	769	769	0	0	6	3	0	M1c	0	0	1	0	0	NA	0	77	140
PD_005	SRR6461166	SRR6461151	RCC	miao	261.451	2512	2165	59	10	210	68	279	289	285	0	4	301	301	0	0	642	298	77	267	214	209	0	5	212	205	0	7	1934	1934	0	0	6	3	0	IV	1	0	0	0	NA	0	0	168	277
PD_007	SRR6889242	SRR6461144	RCC	miao	245.931	3728	3428	66	6	145	83	348	502	492	0	10	372	372	0	0	768	478	81	209	283	263	0	20	332	328	0	4	1810	1810	0	0	3	3	0	IV	1	0	1	0	1	1	1	448	448
PD_010	SRR6461165	SRR6461160	RCC	miao	316.183	2608	2284	70	10	169	75	290	422	411	0	11	503	503	0	0	617	297	83	237	246	232	0	14	267	256	0	11	2092	2092	0	0	6	3	0	IV	1	0	1	0	1	1	1	454	454
PD_011	SRR6461159	SRR6461148	RCC	miao	446.531	6160	5406	176	20	416	142	823	308	303	0	5	441	441	0	0	1553	803	159	591	334	326	0	8	151	141	0	10	2085	2085	0	0	6	3	0	IV	1	0	0	0	NA	1	1	205	327
PD_012	SRR6504840	SRR6461146	RCC	miao	245.297	5896	5538	49	17	179	113	686	2655	2649	0	6	4749	4749	0	0	792	438	130	224	1231	1082	0	149	224	221	0	3	2074	2074	0	0	5	3	0	IV	1	1	0	0	NA	0	0	61	581
PD_013	SRR6461172	SRR6511549	RCC	miao	287.426	5182	4933	56	10	119	64	490	453	439	0	14	387	387	0	0	969	724	71	174	217	201	0	16	161	154	0	7	1485	1485	0	0	6	3	0	IV	1	0	1	0	1	1	1	399	399
PD_014	SRR6461162	SRR6461145	RCC	miao	503.834	5204	4602	138	12	350	102	669	389	384	0	5	493	493	0	0	1268	668	114	486	352	338	0	14	159	151	0	8	2066	2066	0	0	6	3	0	IV	1	0	1	0	1	1	1	433	433
PD_015	SRR6491482	SRR6461152	RCC	miao	229.738	2771	2355	93	6	238	79	420	340	336	0	4	327	327	0	0	738	323	84	331	239	228	0	11	152	146	0	6	1559	1559	0	0	6	3	0	IV	1	0	0	0	NA	0	0	105	814
PD_018	SRR6461150	SRR6461153	RCC	miao	301.15	4139	3790	82	7	190	70	526	419	414	0	5	365	365	0	0	880	535	73	272	209	197	0	12	226	223	0	3	1743	1743	0	0	6	3	0	IV	1	0	0	0	NA	1	1	672	1189
PD_019	SRR6504580	SRR6461158	RCC	miao	314.726	3185	2828	88	7	216	46	278	368	358	0	10	416	416	0	0	748	392	53	303	233	223	0	10	212	206	0	6	1803	1803	0	0	6	3	0	IV	1	0	0	0	NA	1	1	220	230
PD_020	SRR6461168	SRR6461157	RCC	miao	319.208	3306	2997	67	11	172	59	401	420	412	0	8	372	372	0	0	721	423	63	235	153	148	0	5	168	160	0	8	1759	1759	0	0	6	3	0	IV	1	0	0	0	NA	0	0	47	203
PD_021	SRR6461163	SRR6461156	RCC	miao	376.704	4863	4526	54	9	207	67	425	454	448	0	6	453	453	0	0	990	653	77	260	260	247	0	13	251	244	0	7	1991	1991	0	0	6	3	0	IV	1	0	0	0	NA	0	0	68	185
PD_022	SRR6461155	SRR6504841	RCC	miao	291.855	3216	3001	47	6	120	42	224	445	431	0	14	318	318	0	0	630	422	45	163	167	160	0	7	177	174	0	3	1533	1533	0	0	6	3	0	IV	1	0	0	0	NA	0	0	80	247
PD_023	SRR6504581	SRR6461154	RCC	miao	304.338	2856	2525	70	4	208	49	280	330	316	0	14	347	347	0	0	690	360	52	278	180	175	0	5	130	123	0	7	1582	1582	0	0	6	3	0	IV	1	1	0	0	NA	1	1	637	637
PD_024	SRR6461167	SRR6504839	RCC	miao	619.174	7415	5947	345	41	826	256	986	432	419	0	13	897	897	0	0	2317	837	309	1171	560	530	0	30	154	147	0	7	2956	2956	0	0	6	3	0	IV	1	0	0	0	NA	0	0	41	304
PD_025	SRR6461173	SRR6461143	RCC	miao	333.345	1517	1221	63	10	150	73	314	292	283	0	9	310	310	0	0	443	147	83	213	213	208	0	5	198	190	0	8	2014	2014	0	0	5	3	0	IV	1	0	0	0	NA	1	1	333	1724
PD_026	SRR6461170	SRR6461142	RCC	miao	292.124	4504	4190	69	3	180	62	417	320	312	0	8	286	286	0	0	925	618	63	244	154	145	0	9	250	240	0	10	1746	1746	0	0	4	3	0	IV	1	0	0	0	NA	1	1	171	377
PD_030	SRR6461169	SRR6461149	RCC	miao	334.996	3315	2844	111	13	274	73	427	329	323	0	6	368	368	0	0	853	386	83	384	255	243	0	12	162	155	0	7	2133	2133	0	0	5	3	0	IV	0	0	0	0	NA	NA	NA	NA	NA
PGDX3144	PGDX3144T_Ex	PGDX3144N_Ex	colon	le	219.738	4767	3554	37	72	172	932	788	1889	1874	0	15	1902	1902	0	0	189	18	86	85	1130	1011	0	119	1848	1845	0	3	2006	2006	0	0	6	6	0	NA	0	0	0	0	NA	NA	0	NA	NA
PGDX3145	PGDX3145T_Ex	PGDX3145N_Ex	colon	le	212.162	14671	2410	875	1188	1860	8338	556	1889	1874	0	15	1902	1902	0	0	189	18	86	85	1130	1011	0	119	1848	1845	0	3	2006	2006	0	0	6	6	0	NA	0	0	0	0	NA	NA	0	NA	NA
PGDX3146	PGDX3146T_Ex	PGDX3146N_Ex	colon	le	233.511	8109	5339	111	155	409	2095	1812	1889	1874	0	15	1902	1902	0	0	189	18	86	85	1130	1011	0	119	1848	1845	0	3	2006	2006	0	0	5	6	0	NA	0	0	0	0	NA	NA	0	85	630
PGDX3147	PGDX3147T_Ex	PGDX3147N_Ex	colon	le	354.483	3961	793	462	193	1013	1500	86	1889	1874	0	15	1902	1902	0	0	189	18	86	85	1130	1011	0	119	1848	1845	0	3	2006	2006	0	0	4	4	0	NA	0	0	0	0	NA	NA	0	NA	NA
PGDX3148	PGDX3148T_Ex	PGDX3148N_Ex	colon	le	244.435	6033	4790	33	52	165	993	1301	1889	1874	0	15	1902	1902	0	0	189	18	86	85	1130	1011	0	119	1848	1845	0	3	2006	2006	0	0	6	4	0	NA	0	0	0	0	NA	NA	0	NA	NA
PGDX3149	PGDX3149T_Ex	PGDX3149N_Ex	colon	le	255.077	1992	1083	129	46	224	510	128	1889	1874	0	15	1902	1902	0	0	189	18	86	85	1130	1011	0	119	1848	1845	0	3	2006	2006	0	0	6	6	0	NA	0	0	0	0	NA	NA	0	NA	NA
PGDX3150	PGDX3150T_Ex	PGDX3150N_Ex	colon	le	241.638	16230	1735	1180	1646	2545	9124	521	1889	1874	0	15	1902	1902	0	0	189	18	86	85	1130	1011	0	119	1848	1845	0	3	2006	2006	0	0	6	5	0	NA	0	0	0	0	NA	NA	0	1019	1071
PGDX3151	PGDX3151T_Ex	PGDX3151N_Ex	colon	le	160.666	7051	675	444	583	1034	4315	49	1889	1874	0	15	1902	1902	0	0	189	18	86	85	1130	1011	0	119	1848	1845	0	3	2006	2006	0	0	5	3	0	NA	0	0	0	0	NA	NA	0	NA	NA
PGDX3153	PGDX3153T_Ex	PGDX3153N_Ex	colon	le	199.351	8678	6911	36	59	160	1512	1675	1889	1874	0	15	1902	1902	0	0	189	18	86	85	1130	1011	0	119	1848	1845	0	3	2006	2006	0	0	6	6	0	NA	0	0	0	0	NA	NA	1	979	1004
PGDX3154	PGDX3154T_Ex	PGDX3154N_Ex	colon	le	310.29	15240	8672	313	345	1039	4871	2252	1889	1874	0	15	1902	1902	0	0	189	18	86	85	1130	1011	0	119	1848	1845	0	3	2006	2006	0	0	6	5	0	NA	0	0	0	0	NA	NA	0	NA	NA
PGDX3156	PGDX3156T_Ex	PGDX3156N_Ex	colon	le	165.733	5247	3551	56	77	273	1290	831	1889	1874	0	15	1902	1902	0	0	189	18	86	85	1130	1011	0	119	1848	1845	0	3	2006	2006	0	0	6	6	0	NA	0	0	0	0	NA	NA	1	NA	NA
PGDX3157	PGDX3157T_Ex	PGDX3157N_Ex	colon	le	260.437	1785	662	151	52	377	543	83	1889	1874	0	15	1902	1902	0	0	189	18	86	85	1130	1011	0	119	1848	1845	0	3	2006	2006	0	0	6	6	0	NA	0	0	0	0	NA	NA	0	NA	NA
PGDX3158	PGDX3158T_Ex	PGDX3158N_Ex	colon	le	235.882	1573	890	99	33	178	373	106	1889	1874	0	15	1902	1902	0	0	189	18	86	85	1130	1011	0	119	1848	1845	0	3	2006	2006	0	0	6	5	0	NA	0	0	0	0	NA	NA	0	NA	NA
PGDX3161	PGDX3161T_Ex	PGDX3161N_Ex	colon	le	276.046	22094	1350	2831	2035	5768	10110	208	1889	1874	0	15	1902	1902	0	0	189	18	86	85	1130	1011	0	119	1848	1845	0	3	2006	2006	0	0	6	6	0	NA	0	0	0	0	NA	NA	0	NA	NA
PGDX3162	PGDX3162T_Ex	PGDX3162N_Ex	colon	le	135.637	6818	4449	108	134	355	1772	1411	1889	1874	0	15	1902	1902	0	0	189	18	86	85	1130	1011	0	119	1848	1845	0	3	2006	2006	0	0	4	3	0	NA	0	0	0	0	NA	NA	1	NA	NA
PGDX3783	PGDX3783T_Ex	PGDX3783N_Ex	colon	le	137.613	181	112	11	1	18	39	6	386	380	0	6	54	54	0	0	66	1	36	29	34	34	0	0	155	150	0	5	366	366	0	0	6	6	0	NA	1	0	0	0	NA	1	1	NA	NA
PGDX3784	PGDX3784T_Ex	PGDX3784N_Ex	colon	le	224.792	4375	3463	22	33	133	724	872	3652	3615	0	37	3621	3621	0	0	903	7	744	152	1878	1119	0	759	1941	1936	0	5	3033	3033	0	0	6	6	0	NA	1	0	0	0	NA	0	0	NA	NA
PGDX3785	PGDX3785T_Ex	PGDX3785N_Ex	colon	le	191.418	17149	15620	22	52	231	1224	3791	15729	15677	0	52	15913	15913	0	0	1519	8	1262	249	10399	7289	0	3110	11905	11899	0	6	13237	13237	0	0	6	4	0	NA	1	0	0	0	NA	1	1	NA	NA
PGDX3787	PGDX3787T_Ex	PGDX3787N_Ex	endometrial	le	265.451	8270	6795	32	69	217	1157	1540	6751	6701	0	50	7338	7338	0	0	1422	16	1165	241	3856	2482	0	1374	5710	5699	0	11	5916	5916	0	0	4	6	0	NA	1	0	0	0	NA	1	1	NA	NA
PGDX3799	PGDX3799T_Ex	PGDX3799N_Ex	colon	le	220.99	6560	4826	73	91	330	1240	1281	4704	4673	0	31	5245	5245	0	0	1695	17	1305	373	2667	1774	0	893	2374	2362	0	12	4278	4278	0	0	5	5	0	NA	0	0	0	0	NA	NA	0	NA	NA
PGDX4127	PGDX4127T_Ex	PGDX4127N_Ex	colon	le	225.959	5433	3851	86	70	297	1129	1240	3709	3701	0	8	4337	4337	0	0	1552	40	1158	354	693	444	0	249	263	257	0	6	1274	1274	0	0	6	4	0	NA	0	0	0	0	NA	NA	NA	NA	NA
PGDX4137	PGDX4137T1_Ex;PGDX4137T_Ex	PGDX4137N_Ex;PGDX4137N_Ex	colon	le	219.054	5832	3755	77.5	156	278.5	1565	956.5	3750	3735	0	15	3998.5	3998.5	0	0	2053.5	20	1685	348.5	2256	1638.5	0	617.5	1923	1914	0	9	3063	3063	0	0	6	4	0	NA	1	0	0	0	NA	0	0	NA	NA
PGDX4311	PGDX4311T_Ex	PGDX4311N_Ex	endometrial	le	133.707	3612	2726	25	50	144	667	716	2784	2770	0	14	2700	2700	0	0	875	6	704	165	1926	1638	0	288	1778	1773	0	5	2384	2384	0	0	6	5	0	NA	1	0	0	0	NA	1	1	NA	NA
PGDX4397	PGDX4397T_Ex	PGDX4397N_Ex	colon	le	228.986	2522	1869	39	25	108	481	472	1987	1960	0	27	1964	1964	0	0	642	13	500	129	741	399	0	342	200	196	0	4	1468	1468	0	0	6	5	0	NA	0	0	0	0	NA	NA	NA	NA	NA
PGDX4398	PGDX4398T_Ex	PGDX4398N_Ex	colon	le	221.284	7369	6339	45	60	160	765	2025	6397	6388	0	9	6344	6344	0	0	1032	18	820	194	4326	2848	0	1478	2565	2561	0	4	5518	5518	0	0	6	4	0	NA	0	0	0	0	NA	NA	NA	NA	NA
PGDX4947	PGDX4947T_Ex_ATGTCA	PGDX4947N_Ex_AGTTCC	colon	le	228.449	3120	2198	19	52	131	720	511	2291	2272	0	19	2120	2120	0	0	902	14	744	144	1100	591	0	509	1357	1350	0	7	2063	2063	0	0	5	4	0	NA	1	0	0	0	NA	1	1	140	590
PGDX6334	PGDX6334T_Ex_TGACCA	PGDX6334N_Ex	colon	le	206.205	3806	2661	27	67	157	894	607	2739	2732	0	7	2635	2635	0	0	1113	14	922	177	1340	572	0	768	1725	1718	0	7	2182	2182	0	0	5	4	0	NA	1	0	0	0	NA	0	0	NA	NA
PGDX6340	PGDX6340T_Ex_GCCAAT	PGDX6340N_Ex_ACAGTG	thyroid	le	209.166	4005	3704	37	9	109	146	890	3781	3760	0	21	3700	3700	0	0	304	14	151	139	1970	806	0	1164	5265	5255	0	10	3407	3407	0	0	6	5	0	NA	1	0	0	0	NA	0	0	NA	NA
PR03803	SRR3341263	SRR3341262	melanoma	snyder	104.581	13057	1046	543	1303	1131	9034	286	640	638	0	2	901	901	0	0	12106	74	10362	1670	436	420	0	16	230	227	0	3	1020	1020	0	0	6	3	0	IIIC	0	0	1	0	0	NA	0	1652	2885
PR12117	SRR3341265	SRR3341264	melanoma	snyder	98.4915	5641	5011	38	34	106	452	1134	4859	4856	0	3	4931	4931	0	0	652	27	484	141	3825	3640	0	185	3244	3235	0	9	4812	4812	0	0	6	3	0	M1c	0	0	1	0	1	NA	1	511	584
PR4035	SRR3341267	SRR3341266	melanoma	snyder	106.112	2673	2546	7	8	37	75	533	2430	2421	0	9	2388	2388	0	0	167	40	84	43	1660	1566	0	94	4216	4214	0	2	2709	2709	0	0	6	3	0	M1c	0	0	1	0	1	NA	1	1526	1534
PR4046	SRR3341269	SRR3341268	melanoma	snyder	105.409	970	861	13	4	30	62	174	857	851	0	6	754	754	0	0	131	32	59	40	429	398	0	31	530	528	0	2	974	974	0	0	6	3	0	M1a	0	0	1	0	1	NA	1	767	767
PR4077	SRR3341271	SRR3341270	melanoma	snyder	105.707	7444	7328	8	8	33	67	1712	7194	7185	0	9	7193	7193	0	0	159	40	79	40	5391	5086	0	305	4436	4433	0	3	6756	6756	0	0	5	3	0	M1c	0	0	1	0	1	NA	1	2212	2228
PR4091	SRR3341273	SRR3341272	melanoma	snyder	102.819	1890	1728	20	11	35	96	321	1391	1388	0	3	1330	1330	0	0	256	95	109	52	1008	938	0	70	1659	1655	0	4	1663	1663	0	0	6	3	0	M1a	0	0	1	0	1	NA	1	2191	2191
PR4092	SRR3341275	SRR3341274	melanoma	snyder	107.662	9562	9467	7	7	24	57	2654	9120	9113	0	7	11744	11744	0	0	126	32	63	31	6224	5795	0	429	3722	3716	0	6	7341	7341	0	0	6	3	0	M1a	0	0	1	0	1	NA	1	2205	2228
R7495	SRR2648139	SRR2648138	NSCLC	rizvi	114.026	497	454	8	2	9	24	94	437	435	0	2	599	599	0	0	52	9	26	17	282	261	0	21	244	242	0	2	751	751	0	0	6	3	0	IV	1	0	0	0	NA	0	0	42	NA
RCC_1	SRR6468332	SRR6468313	RCC	miao	168.446	5622	5480	34	2	58	48	682	385	380	0	5	267	267	0	0	973	834	48	91	149	147	0	2	156	153	0	3	1104	1104	0	0	6	3	0	IV	1	0	0	0	NA	0	0	38	43
RCC_10	SRR6468339	SRR6468303	RCC	miao	221.412	5106	4924	47	6	85	44	575	457	453	0	4	404	404	0	0	892	711	49	132	246	230	0	16	287	284	0	3	1314	1314	0	0	5	3	0	IV	1	0	0	0	NA	1	1	173	1058
RCC_102	SRR6468374	SRR6468335	RCC	miao	412.998	9405	9172	57	9	80	87	830	635	622	0	13	731	731	0	0	1680	1450	94	136	279	252	0	27	477	474	0	3	1751	1751	0	0	5	3	0	IV	1	0	0	0	NA	1	1	108	165
RCC_11	SRR6468307	SRR6504587	RCC	miao	225.243	13969	12817	284	8	630	230	1861	288	287	0	1	198	198	0	0	3150	2003	234	913	147	140	0	7	214	211	0	3	912	912	0	0	6	3	0	IV	1	0	0	0	NA	1	1	122	1024
RCC_114	SRR6468328	SRR6468323	RCC	miao	155.766	4086	3947	34	8	55	42	528	351	344	0	7	253	253	0	0	732	596	48	88	166	154	0	12	98	98	0	0	971	971	0	0	6	3	0	IV	1	0	0	0	NA	1	1	208	340
RCC_119	SRR6468311	SRR6468266	RCC	miao	125.805	13427	12578	174	5	400	270	3469	320	320	0	0	154	154	0	0	2833	1987	272	574	113	109	0	4	281	280	0	1	781	781	0	0	6	3	0	IV	1	0	0	0	NA	1	1	414	773
RCC_15	SRR6468326	SRR6468267	RCC	miao	203.973	1885	1752	26	4	67	36	224	535	527	0	8	403	403	0	0	348	217	40	91	225	210	0	15	267	264	0	3	1346	1346	0	0	6	3	0	IV	1	0	0	0	NA	1	1	663	1013
RCC_20	SRR6468302	SRR6468264	RCC	miao	153.342	17809	16830	184	7	459	329	4795	389	389	0	0	108	108	0	0	3532	2551	337	644	114	111	0	3	201	198	0	3	638	638	0	0	3	3	0	IV	1	0	0	0	NA	1	1	1022	1065
RCC_25	SRR6504586	SRR6468314	RCC	miao	233.806	3072	2924	39	7	65	37	345	567	554	0	13	494	494	0	0	539	391	45	103	274	251	0	23	154	151	0	3	1311	1311	0	0	6	3	0	IV	1	0	0	0	NA	0	0	39	167
RCC_27	SRR6468375	SRR6468337	RCC	miao	248.003	2180	2074	21	5	43	37	167	561	551	0	10	619	619	0	0	339	234	42	63	196	176	0	20	285	282	0	3	1386	1386	0	0	6	3	0	IV	1	0	0	0	NA	0	0	35	968
RCC_281066	SRR6450224	SRR6447690	RCC	miao	148.969	4188	3556	150	5	412	65	628	196	194	0	2	243	243	0	0	1184	555	69	560	200	188	0	12	165	161	0	4	1279	1279	0	0	6	3	0	IV	1	0	0	0	NA	1	1	460	460
RCC_32	SRR6504589	SRR6468342	RCC	miao	167.46	4570	4435	27	6	54	48	591	485	477	0	8	386	386	0	0	785	655	52	78	229	213	0	16	205	203	0	2	1132	1132	0	0	5	3	0	IV	1	0	0	0	NA	1	1	213	240
RCC_371982	SRR6450222	SRR6447681	RCC	miao	190.402	2816	2036	181	19	467	113	360	267	266	0	1	394	394	0	0	1065	286	131	648	323	299	0	24	268	256	0	12	2002	2002	0	0	6	3	0	IV	1	0	0	0	NA	0	0	71	448
RCC_39	SRR6468348	SRR6504590	RCC	miao	159.095	5364	5156	53	6	90	59	509	275	272	0	3	209	209	0	0	974	769	63	142	100	93	0	7	96	94	0	2	776	776	0	0	5	3	0	IV	1	0	0	0	NA	0	0	37	306
RCC_390392	SRR6450229	SRR6447678	RCC	miao	155.602	2724	1953	181	24	421	145	350	266	263	0	3	330	330	0	0	1052	279	171	602	304	273	0	31	289	279	0	10	1458	1458	0	0	5	3	0	IV	1	0	0	0	NA	1	1	55	174
RCC_470874	SRR6450226	SRR6447680	RCC	miao	254.779	4842	4478	83	9	196	76	498	363	360	0	3	361	361	0	0	1052	688	85	279	269	248	0	21	330	316	0	14	2032	2032	0	0	6	3	0	IV	1	0	0	0	NA	0	0	42	247
RCC_472770	SRR6450230	SRR6504837	RCC	miao	131.337	4532	4115	88	18	235	76	760	259	257	0	2	213	213	0	0	1042	634	92	316	228	217	0	11	191	189	0	2	1266	1266	0	0	6	3	0	IV	1	0	0	0	NA	0	0	84	558
RCC_504642	SRR6450228	SRR6447675	RCC	miao	272.667	4786	4421	96	8	194	67	249	417	410	0	7	294	294	0	0	1027	670	68	289	215	196	0	19	227	220	0	7	1771	1771	0	0	6	3	0	IV	1	0	0	0	NA	0	0	41	102
RCC_509214	SRR6450231	SRR6504836	RCC	miao	168.963	3074	2724	104	8	180	58	291	220	219	0	1	192	192	0	0	777	430	65	282	177	162	0	15	209	206	0	3	1445	1445	0	0	3	3	0	IV	1	0	0	0	NA	1	1	204	370
RCC_51974086	SRR6450227	SRR6447676	RCC	miao	291.242	4913	4579	72	8	176	78	392	581	573	0	8	526	526	0	0	1008	677	86	245	361	331	0	30	373	366	0	7	1995	1995	0	0	6	3	0	IV	1	0	0	0	NA	1	1	220	456
RCC_52	SRR6504588	SRR6468315	RCC	miao	147.991	7853	7700	35	8	62	48	1107	482	478	0	4	321	321	0	0	1326	1174	55	97	225	215	0	10	223	221	0	2	959	959	0	0	6	3	0	IV	1	0	0	0	NA	1	1	246	995
RCC_554652	SRR6450232	SRR6447677	RCC	miao	325.528	6513	6193	80	8	166	66	372	485	479	0	6	530	530	0	0	1251	941	73	237	275	246	0	29	317	303	0	14	2083	2083	0	0	6	3	0	IV	1	0	0	0	NA	1	1	336	484
RCC_56	SRR6468373	SRR6468346	RCC	miao	356.443	1322	1253	14	5	25	25	131	711	699	0	12	924	924	0	0	170	103	28	39	220	200	0	20	525	521	0	4	1683	1683	0	0	6	3	0	IV	1	0	0	0	NA	1	1	81	992
RCC_58	SRR6468321	SRR6468322	RCC	miao	161.199	6670	6519	32	2	65	52	902	362	360	0	2	282	282	0	0	1139	993	50	96	173	170	0	3	230	224	0	6	1200	1200	0	0	6	3	0	IV	1	0	0	0	NA	1	1	687	988
RCC_62	SRR6468347	SRR6468334	RCC	miao	167.383	3876	3722	38	5	70	41	440	471	465	0	6	310	310	0	0	694	541	45	108	203	185	0	18	221	220	0	1	1112	1112	0	0	5	3	0	IV	1	0	0	0	NA	1	1	87	106
RCC_68	SRR6504583	SRR6468338	RCC	miao	318.155	21804	20638	309	20	539	298	3231	386	381	0	5	259	259	0	0	4507	3342	320	845	167	160	0	7	149	146	0	3	1550	1550	0	0	4	3	0	IV	1	0	0	0	NA	0	0	39	740
RCC_79	SRR6468316	SRR6468310	RCC	miao	160.445	7617	7429	47	3	82	56	1065	431	426	0	5	221	221	0	0	1329	1146	54	129	157	145	0	12	165	165	0	0	1030	1030	0	0	5	3	0	IV	1	0	0	0	NA	1	1	130	873
RCC_84	SRR6468336	SRR6504585	RCC	miao	161.6	8304	8112	41	8	94	49	925	405	401	0	4	367	367	0	0	1427	1242	51	134	241	223	0	18	225	222	0	3	1352	1352	0	0	6	3	0	IV	1	0	0	0	NA	1	1	88	680
RCC_85	SRR6468330	SRR6511552	RCC	miao	168.688	6544	4942	432	6	867	297	1282	314	314	0	0	108	108	0	0	2377	776	302	1299	85	82	0	3	190	189	0	1	507	507	0	0	6	3	0	IV	1	0	0	0	NA	1	1	42	712
RCC_97	SRR6468341	SRR6468308	RCC	miao	216.44	8357	8170	35	9	86	57	950	475	462	0	13	382	382	0	0	1444	1259	64	121	242	219	0	23	244	241	0	3	1348	1348	0	0	6	3	0	IV	1	0	0	0	NA	0	0	37	871
RCC.PD1.DNA.1026	SRR6461164	SRR6461161	RCC	miao	92.3414	297	226	6	4	30	31	40	367	358	0	9	146	146	0	0	79	11	34	34	109	103	0	6	81	77	0	4	418	418	0	0	5	3	0	IV	1	0	0	0	NA	1	1	949	1442
RCC.PD1.DNA.1101	SRR6461171	SRR6461176	RCC	miao	86.6761	271	190	12	0	27	42	29	307	303	0	4	133	133	0	0	86	8	40	38	80	75	0	5	57	55	0	2	344	344	0	0	6	3	0	IV	1	0	0	0	NA	1	1	163	440
RCC.PD1.DNA.1137	SRR6461180	SRR6461174	RCC	miao	96.99	5852	950	622	715	1415	2150	249	234	233	0	1	366	366	0	0	4964	18	2910	2036	1667	1603	0	64	340	334	0	6	1761	1761	0	0	5	3	0	IV	1	0	0	0	NA	1	1	119	1584
RCC.PD1.DNA.944	SRR6461175	SRR6461178	RCC	miao	89.0863	308	210	14	5	37	42	53	348	347	0	1	157	157	0	0	102	5	47	50	131	125	0	6	173	171	0	2	554	554	0	0	6	3	0	IV	1	0	0	0	NA	0	0	36	470
RCC.PD1.DNA.949	SRR6461177	SRR6461179	RCC	miao	84.4129	356	179	21	7	69	80	45	368	368	0	0	103	103	0	0	181	7	84	90	142	136	0	6	156	153	0	3	482	482	0	0	6	3	0	IV	1	0	0	0	NA	1	1	246	364
RH090935	SRR2648141	SRR2648140	NSCLC	rizvi	113.657	952	687	23	19	61	162	150	576	569	0	7	511	511	0	0	314	53	179	82	314	286	0	28	215	214	0	1	717	717	0	0	6	3	0	IV	1	0	0	0	NA	1	1	312	312
RI1933	SRR2648143	SRR2648142	NSCLC	rizvi	105.606	1440	1364	4	1	27	44	412	1320	1317	0	3	1558	1558	0	0	78	5	42	31	783	736	0	47	409	408	0	1	1249	1249	0	0	5	3	0	IV	1	0	0	0	NA	1	1	498	498
RO3338	SRR2648145	SRR2648144	NSCLC	rizvi	100.517	613	445	20	8	41	99	97	347	346	0	1	300	300	0	0	196	33	103	60	133	123	0	10	480	474	0	6	692	692	0	0	6	3	0	IV	1	0	0	0	NA	0	0	63	NA
SA9755	SRR2648147	SRR2648146	NSCLC	rizvi	140.442	7804	3275	395	311	892	2931	850	2850	2850	0	0	3754	3754	0	0	4577	70	3232	1275	1976	1680	0	296	1242	1238	0	4	3155	3155	0	0	6	6	0	IV	1	0	0	0	NA	1	1	252	252
SB010944	SRR2648149	SRR2648148	NSCLC	rizvi	108.079	1627	733	73	55	196	570	111	542	539	0	3	790	790	0	0	925	48	616	261	150	136	0	14	422	421	0	1	813	813	0	0	6	3	0	IV	1	0	0	0	NA	1	1	819	819
SC0899	SRR2648151	SRR2648150	NSCLC	rizvi	94.2175	1649	1457	14	6	55	117	390	1382	1379	0	3	1346	1346	0	0	223	39	119	65	727	689	0	38	426	423	0	3	1126	1126	0	0	6	3	0	IV	1	0	0	0	NA	1	1	378	378
SC6470	SRR2648153	SRR2648152	NSCLC	rizvi	94.9888	771	715	2	4	16	34	200	786	783	0	3	732	732	0	0	67	9	40	18	424	397	0	27	273	272	0	1	760	760	0	0	6	3	0	IV	1	0	0	0	NA	1	1	249	NA
SD0346	SRR3341277	SRR3341276	melanoma	snyder	155.043	3726	3607	6	9	36	68	664	3193	3158	0	35	3230	3230	0	0	256	144	73	39	1807	1569	0	238	3972	3965	0	7	2873	2873	0	0	6	3	0	M1b	0	0	1	1	1	NA	1	476	1059
SD1494	SRR3341279	SRR3341278	melanoma	snyder	207.503	6188	5960	34	14	69	111	957	5992	5963	0	29	6247	6247	0	0	285	93	104	88	3739	3546	0	193	4697	4688	0	9	5163	5163	0	0	6	3	0	M1c	0	0	1	0	1	NA	1	357	730
SD2051	SRR3341281	SRR3341280	melanoma	snyder	143.898	298	257	8	2	20	11	39	657	644	0	13	240	240	0	0	44	3	13	28	125	118	0	7	249	246	0	3	641	641	0	0	4	3	0	M1c	0	0	1	1	0	NA	0	112	292
SD2056	SRR3341283	SRR3341282	melanoma	snyder	157.783	781	764	5	0	7	5	151	1098	1080	0	18	773	773	0	0	19	2	5	12	436	392	0	44	466	464	0	2	1005	1005	0	0	6	3	0	M1b	0	0	1	0	1	NA	1	1424	1424
SD5038	SRR3341285	SRR3341284	melanoma	snyder	177.07	1927	1847	8	4	28	40	328	1854	1829	0	25	1775	1775	0	0	155	76	43	36	854	766	0	88	1120	1114	0	6	1720	1720	0	0	6	3	0	M1c	0	0	1	0	0	NA	0	168	438
SD5118	SRR3341287	SRR3341286	melanoma	snyder	149.043	2388	1791	28	15	163	391	352	487	486	0	1	632	632	0	0	856	300	393	163	146	137	0	9	239	230	0	9	486	486	0	0	3	3	0	M1c	0	0	1	0	0	NA	0	168	986
SD5934	SRR3341289	SRR3341288	melanoma	snyder	152.364	1086	1030	4	2	14	36	187	1115	1090	0	25	1058	1058	0	0	99	47	35	17	430	379	0	51	380	376	0	4	886	886	0	0	3	3	0	M1c	0	0	1	0	0	NA	0	98	584
SD6336	SRR3341291	SRR3341290	melanoma	snyder	232.485	2876	2656	25	9	57	129	356	2635	2609	0	26	2558	2558	0	0	319	107	135	77	1278	1171	0	107	1287	1283	0	4	2226	2226	0	0	6	3	0	M1c	0	0	1	0	1	NA	1	2520	2520
SD6494	SRR3341293	SRR3341292	melanoma	snyder	123.032	5097	4963	13	8	44	69	1102	3086	3072	0	14	3149	3149	0	0	513	395	66	52	1919	1798	0	121	4361	4353	0	8	2682	2682	0	0	6	3	0	M1c	0	0	1	0	0	NA	0	91	256
SD7357	SRR3341295	SRR3341294	melanoma	snyder	191.336	7847	7344	40	23	163	277	1293	6539	6529	0	10	7239	7239	0	0	686	216	282	188	4016	3745	0	271	4548	4544	0	4	5242	5242	0	0	6	3	0	M1c	0	0	1	0	0	NA	0	147	730
SR070761	SRR2648155	SRR2648154	NSCLC	rizvi	122.487	4164	653	173	356	447	2535	71	521	519	0	2	717	717	0	0	3545	34	2899	612	199	178	0	21	423	419	0	4	1088	1088	0	0	6	3	0	IV	1	0	0	0	NA	0	0	102	NA
TU0428	SRR2648157	SRR2648156	NSCLC	rizvi	102.755	3040	2301	54	43	216	426	458	1194	1193	0	1	6998	6998	0	0	809	75	470	264	1538	1460	0	78	1036	1033	0	3	1987	1987	0	0	6	3	0	IV	1	0	0	0	NA	0	0	63	NA
VA1330	SRR2648159	SRR2648158	NSCLC	rizvi	97.3304	190	103	14	1	38	34	14	235	232	0	3	75	75	0	0	92	5	36	51	47	47	0	0	49	48	0	1	323	323	0	0	5	3	0	IV	1	0	0	0	NA	0	0	123	NA
VA7859	SRR2648161	SRR2648160	NSCLC	rizvi	97.4508	192	117	5	4	24	42	6	177	176	0	1	147	147	0	0	79	7	46	26	36	34	0	2	60	59	0	1	383	383	0	0	6	3	0	IV	1	0	0	0	NA	0	0	189	NA
WA7899	SRR2648163	SRR2648162	NSCLC	rizvi	123.435	623	481	15	7	32	88	105	489	489	0	0	471	471	0	0	157	16	94	47	182	169	0	13	251	249	0	2	691	691	0	0	5	3	0	IV	1	0	0	0	NA	0	0	57	NA
Y2087	SRR2648165	SRR2648164	NSCLC	rizvi	112.214	13533	1382	528	1275	1169	9179	236	376	373	0	3	605	605	0	0	12358	205	10467	1686	340	309	0	31	266	260	0	6	1098	1098	0	0	6	6	0	IV	1	0	0	0	NA	1	1	249	NA
ZA6505	SRR2648167	SRR2648166	NSCLC	rizvi	99.818	1516	1206	28	15	83	184	224	344	344	0	0	4259	4259	0	0	421	113	198	110	564	543	0	21	245	244	0	1	673	673	0	0	6	3	0	IV	1	0	0	0	NA	0	0	57	NA
ZA6965	SRR2648169	SRR2648168	NSCLC	rizvi	117.425	487	220	75	3	130	59	73	526	523	0	3	192	192	0	0	270	4	62	204	78	75	0	3	90	87	0	3	471	471	0	0	6	3	0	IV	1	0	0	0	NA	1	1	132	132
[truncated: 14 more columns]

## Sheet: Supplementary Table S3
Supplementary Table S3: Per-patient summary of driver variants and neoepitopes. The “Patient” column indicates the patient identifier, and the “Tumor_ID” column indicates the tumor sample identifier(s); for patients with more than one tumor sample, median values are presented in subsequent columns of the table. The “Total_clinvar_variants” column indicates the number of variants annotated as “pat…
Patient	Tumor	Total_clinvar_variants	Total_clinvar_neopeptides	Presented_clinvar_variants	Presented_clinvar_epitopes
RCC_554652	SRR6450232	0	0	0	0
DI6359	SRR2648113	1	194	1	16
P25	SRR5149291	2	272	1	7
Pat85	SRR2777326	2	0	0	0
11025-13	Pem13T	0	0	0	0
53	53A;53D	4	272	1	45
16	16C;16D	4	544	2	107
Pat50	SRR2774183	7	816	3	113
RCC_84	SRR6468336	1	272	1	44
Pat171	SRR2747280	0	0	0	0
Hugo_Pt13	SRR3083855	2	272	1	36
Pat124	SRR2747991	4	1022	4	76
RCC_79	SRR6468316	0	0	0	0
Pat19	SRR2779901	1	272	1	12
Pat21	SRR2702801	5	610	2	20
PD_011	SRR6461159	0	0	0	0
Pat100	SRR2741440	1	272	1	10
NR4631	SRR3341233	6	897	3	171
VA1330	SRR2648159	0	0	0	0
RO3338	SRR2648145	1	273	1	44
Pat119	SRR2727854	2	544	2	37
10	988518-5	0	0	0	0
Pat11	SRR2773334	7	1098	4	160
RCC_62	SRR6468347	0	0	0	0
PGDX3784	PGDX3784T_Ex	3	544	2	27
RCC.PD1.DNA.1026	SRR6461164	0	0	0	0
P22	SRR5149294	2	273	1	62
LSD4744	SRR3341207	6	861	3	189
Hugo_Pt29	SRR3083876	1	272	1	7
28	28A;28D	2	272	1	10.5
49	49E	11	1659	5	264
CR0095	SRR3341169	3	544	2	111
Pat47	SRR2772900	2	272	1	7
2	18931416	5	544	2	64
Pat166	SRR2665040	0	0	0	0
11025-22	Pem22T	0	0	0	0
12	1007449-2	1	272	1	26
P37	SRR5149297	0	0	0	0
Pat126	SRR2772336	2	544	1	40
RCC_114	SRR6468328	0	0	0	0
PGDX3153	PGDX3153T_Ex	11	1295	5	118
PD_030	SRR6461169	1	0	0	0
P46	SRR5149300	3	478	2	40
11025-27	Pem27T	2	544	2	95
Pat139	SRR2684746	9	1907	7	297
PD_022	SRR6461155	0	0	0	0
15349_CCPM_0600862	SRR6461181;SRR6504582	0	0	0	0
DM007	SRR6431457	3	523	2	57
Pat140	SRR2777977	0	0	0	0
RCC_85	SRR6468330	0	0	0	0
Pat175	SRR2770550	2	544	0	0
NR9449	SRR3341255	3	861	3	59
Hugo_Pt33	SRR4289734	3	826	3	117
PD_013	SRR6461172	0	0	0	0
Hugo_Pt12	SRR3083882	3	544	1	2
20	20A;20E	12	2197	8	487
Pat25	SRR2589158	1	0	0	0
Hugo_Pt35	SRR4289738	5	816	3	145
PGDX4398	PGDX4398T_Ex	13	1629	6	372
DM005	SRR6431455	11	1661	6	302
DM022	SRR6431483	1	0	0	0
Pat157	SRR2706574	2	544	2	56
Pat57	SRR2778237	0	0	0	0
Hugo_Pt32	SRR4289732	2	544	2	7
11025-17	Pem17T	1	357	1	56
Hugo_Pt7	SRR3083870	6	1360	5	224
CR3665	SRR3341179	0	0	0	0
1	951228-3	1	272	1	8
DM024	SRR6431487	0	0	0	0
PD_005	SRR6461166	0	0	0	0
Hugo_Pt14	SRR3083868	9	1904	6	248
Pat168	SRR2778705	1	272	1	2
RCC_97	SRR6468341	0	0	0	0
Hugo_Pt9	SRR3083849	4	816	3	70
Pat148	SRR2753967	1	272	0	0
NR4949	SRR3341237	2	544	2	18
Hugo_Pt4	SRR3083837	16	1632	6	180
Hugo_Pt6	SRR3083863	3	816	3	103
P31	SRR5149286	4	1091	2	27
54	54A;54C	2	544	2	124
26	26C;26E	3	544	2	84
Mel38	SRR2672866;SRR2673115	3	544	2	69
Pat103	SRR2589478	3	544	1	18
PGDX3158	PGDX3158T_Ex	3	610	2	48
CR9306	SRR3341189	7	1566	4	87
Hugo_Pt20	SRR3083872	3	544	2	18
Hugo_Pt16	SRR4289721	3	610	2	78
Pat13	SRR2770259	0	0	0	0
PR4092	SRR3341275	4	901	4	67
SD5118	SRR3341287	1	269	1	69
DM123062	SRR2648115	0	0	0	0
15349_CCPM_0600855	SRR6450189	2	765	2	207
RCC_119	SRR6468311	0	0	0	0
VA7859	SRR2648161	0	0	0	0
Pat32	SRR2689326	1	272	1	62
RCC_504642	SRR6450228	1	338	1	53
NR9341	SRR3341251	3	544	2	153
PGDX3157	PGDX3157T_Ex	4	478	2	49
R7495	SRR2648139	2	272	1	32
SD2051	SRR3341281	2	610	2	18
DM013	SRR6431465	15	2992	10	345
CR04885	SRR3341171	8	1088	4	114
PGDX3787	PGDX3787T_Ex	11	2281	4	94
Pat56	SRR2774324	0	0	0	0
SA9755	SRR2648147	4	544	2	125
RCC_27	SRR6468375	0	0	0	0
15	1018464-1	22	3264	12	340
RCC_470874	SRR6450226	1	272	1	72
Pat143	SRR2712344	3	635	2	34
RCC_15	SRR6468326	0	0	0	0
Hugo_Pt23	SRR3083874	3	913	3	43
Pat59	SRR2779219	3	816	3	38
Hugo_Pt22	SRR3083878	1	272	1	2
31	31A	4	1091	2	33
Pat138	SRR2772131	9	2176	8	377
Pat71	SRR2670951	7	1374	4	273
LO3793	SRR2648129	1	272	1	7
RCC_102	SRR6468374	1	272	1	72
CRNR0244	SRR3341193	3	816	3	91
NR6721	SRR3341243	2	544	2	25
BL3403	SRR2648107	1	272	0	0
PR4091	SRR3341273	2	544	2	46
PD_024	SRR6461167	1	0	0	0
PD_010	SRR6461165	0	0	0	0
Pat08	SRR2773750	5	1088	4	173
Pat135	SRR2731893	0	0	0	0
Pat80	SRR2765066	2	544	2	65
Pat58	SRR2767760	5	1103	4	157
CU9061	SRR2648111	3	599	2	71
NR3156	SRR3341223	1	272	1	46
RCC_20	SRR6468302	1	272	0	0
LSD4691	SRR3341205	1	272	1	2
P16	SRR5149298	4	544	2	115
NR2137	SRR3341221	4	816	3	192
Pat88	SRR2765304	9	1653	6	246
Case3-UCLA	SRR3653963	3	544	1	19
25	25A;25C	2	272	0.5	2.5
PR12117	SRR3341265	3	816	3	22
3	967658-5	0	0	0	0
Hugo_Pt38	SRR4289744	1	272	1	19
Pat45	SRR2677161	7	1370	5	50
NR4810	SRR3341235	5	816	3	166
Pat66	SRR2693653	3	544	2	78
Pat123	SRR2679057	3	544	2	44
11025-35	Pem35T	2	466	2	64
DM017	SRR6431473	7	852	3	147
Pat133	SRR2670626	1	272	1	27
NR6689	SRR3341241	0	0	0	0
23	23A	0	0	0	0
NR9445	SRR3341253	3	544	2	34
DM019	SRR6431477	7	1360	4	139
Pat37	SRR2773626	1	272	1	76
PD_012	SRR6504840	1	408	1	81
22	22A;22B	1.5	273	1	63
5	971484-3	0	0	0	0
Pat98	SRR2588422	1	272	1	7
4	4D	2	544	2	11
11025-10	Pem10T	0	0	0	0
Hugo_Pt28	SRR3083851	2	272	1	51
Pat106	SRR2732125	1	272	1	3
Hugo_Pt5	SRR3083857	1	272	1	9
16	1029860-5	2	544	2	37
34	34A	6	1220	4	238
SD0346	SRR3341277	4	544	2	151
Case1-UCLA	SRR3653952;SRR3653953	9	2176	8	50.5
Pat115	SRR2675269	1	0	0	0
41	41A	0	0	0	0
RCC_10	SRR6468339	0	0	0	0
SC0899	SRR2648151	4	1088	4	145
AL4602	SRR2648103	3	738	3	139
PD_020	SRR6461168	0	0	0	0
47	47A;47D	1.5	136	0.5	1
RCC.PD1.DNA.949	SRR6461177	0	0	0	0
RCC_68	SRR6504583	0	0	0	0
DM021	SRR6431481	5	544	2	119
CRNR4941	SRR3341197	1	272	1	31
PGDX4137	PGDX4137T1_Ex;PGDX4137T_Ex	4	544	2	127
Hugo_Pt10	SRR4289717	0	0	0	0
SD5038	SRR3341285	2	272	1	65
NR4083	SRR3341231	1	0	0	0
Pat117	SRR2677533	2	272	1	10
PGDX3148	PGDX3148T_Ex	10	1979	7	376
Pat113	SRR2661932	1	269	1	43
Pat77	SRR2772803	2	272	1	29
CR9699	SRR3341191	2	544	2	40
24	24C	5	466	2	93
Case2-UCLA	SRR3653959	2	589	1	19
CA9903	SRR2648109	1	194	1	6
Pat41	SRR2775592	3	544	2	20
SD1494	SRR3341279	5	1122	5	13
LSD3484	SRR3341203	8	988	3	70
Pat127	SRR2772054	2	408	2	78
DM018	SRR6431475	4	882	2	97
RCC_390392	SRR6450229	0	0	0	0
PD_026	SRR6461170	1	0	0	0
LSD0167	SRR3341199	2	544	2	88
11025-28	Pem28T	0	0	0	0
6	978614-3	10	1907	5	44
P9	SRR5149288	0	0	0	0
Pat16	SRR2717684	8	1001	4	127
Case4-UCLA	SRR3653954;SRR3653955	1	272	1	5
RH090935	SRR2648141	0	0	0	0
LSDNR1120	SRR3341211	4	816	3	146
NR6842	SRR3341245	0	0	0	0
Pat162	SRR2692147	2	272	0	0
LSDNR9298	SRR3341217	9	1910	7	104
PD_007	SRR6889242	1	0	0	0
Hugo_Pt3	SRR3083841	9	2176	8	77
PR03803	SRR3341263	4	816	1	2
15	15C	2	544	2	93
DM023	SRR6431485	4	1265	4	173
P47	SRR5149292	3	272	1	3
PGDX3150	PGDX3150T_Ex	2	516	2	37
PD_019	SRR6504580	1	272	0	0
Hugo_Pt25	SRR3083880	0	0	0	0
PGDX4311	PGDX4311T_Ex	6	738	3	117
Pat33	SRR2677297	0	0	0	0
13	1004223-5	6	1088	4	95
Pat167	SRR2767414	1	206	1	6
SD6336	SRR3341291	2	272	1	44
RCC_25	SRR6504586	1	272	1	52
Pat15	SRR2768790	1	272	1	2
1	1D	0	0	0	0
GR0134	SRR2648119	0	0	0	0
Hugo_Pt15	SRR3083845	6	257	2	32
P50	SRR5149287	12	2197	8	182
42	42E	2	610	2	91
Pat44	SRR2588166	1	272	1	3
Pat74	SRR2680970	3	424	2	21
P24	SRR5149301	5	466	2	65
RCC_281066	SRR6450224	0	0	0	0
SD7357	SRR3341295	6	1088	4	198
Pat130	SRR2778365	3	816	1	17
Pat39	SRR2757601	2	544	0	0
Y2087	SRR2648165	0	0	0	0
RCC.PD1.DNA.1137	SRR6461180	0	0	0	0
Hugo_Pt19	SRR3083847	3	544	2	78
RCC_472770	SRR6450230	0	0	0	0
PGDX3151	PGDX3151T_Ex	0	0	0	0
NR4018	SRR3341227	3	816	3	68
DM015	SRR6431469	8	1381	5	318
SB010944	SRR2648149	0	0	0	0
Hugo_Pt21	SRR3083861	1	272	0	0
NR9705	SRR3341259	2	544	2	13
Pat18	SRR2780332	1	272	1	22
Pat28	SRR2771788	1	272	1	45
Hugo_Pt27	SRR4289725;SRR4289726	11	1904	7	208
Pat49	SRR2777655	4	1088	3	37
Pat64	SRR2589808	6	1432	4	19
RCC_58	SRR6468321	0	0	0	0
PR4046	SRR3341269	2	544	2	30
P6	SRR5149296	0	0	0	0
Pat110	SRR2774559	17	1784	5	57
RCC_56	SRR6468373	0	0	0	0
Pat24	SRR2663954	0	0	0	0
RCC.PD1.DNA.944	SRR6461175	2	0	0	0
PD_014	SRR6461162	2	272	1	24
Pat54	SRR2726249	6	1088	3	30
NR5784	SRR3341239	0	0	0	0
Mel21	SRR2672888;SRR2673015;SRR2673095	3	816	3	48
2	2E	4	816	3	142
PD_023	SRR6504581	0	0	0	0
SD2056	SRR3341283	0	0	0	0
NR8727	SRR3341247	1	136	1	53
Pat40	SRR2663198	0	0	0	0
Pat92	SRR2775168	0	0	0	0
6	6B	0	0	0	0
Pat104	SRR2753222	1	272	1	61
PGDX3144	PGDX3144T_Ex	3	735	2	36
Hugo_Pt30	SRR4289728	2	544	2	68
GR4788	SRR2648121	1	0	0	0
Pat63	SRR2770409	1	272	1	1
RI1933	SRR2648143	1	194	1	19
PGDX3149	PGDX3149T_Ex	3	516	2	91
Pat86	SRR2587585	3	816	3	14
12	12A	2	544	1	7
18	18A;18C	1	194	1	11
Pat43	SRR2776798	2	599	2	12
NR9521	SRR3341257	6	882	3	98
Hugo_Pt2	SRR3083839	9	2514	9	463
PR4077	SRR3341271	6	1088	2	77
3	3C;3D1;3D2	0	0	0	0
LSDNR3086	SRR3341215	1	272	1	1
TU0428	SRR2648157	3	272	1	50
Hugo_Pt8	SRR4289715	22	4336	14	446
Pat109	SRR2762331	2	589	2	11
Pat90	SRR2588053	1	272	1	5
Pat105	SRR2589393	1	272	1	1
Hugo_Pt36	SRR4289740	3	816	3	153
RCC_51974086	SRR6450227	0	0	0	0
PGDX3161	PGDX3161T_Ex	4	478	2	26
11025-1	Pem1T	10	1394	5	254
Pat82	SRR2682345	3	544	2	78
Pat14	SRR2774418	1	272	1	2
NR1867	SRR3341219	1	194	1	21
Pat03	SRR2587785	3	544	2	40
IM_001	SRR6504838	1	408	1	62
CR6126	SRR3341183	1	272	1	24
9	9A;9C;9D	0	0	0	0
Hugo_Pt24	SRR3083853	3	544	2	48
RCC_32	SRR6504589	0	0	0	0
Hugo_Pt31	SRR4289730	3	544	2	19
CR4880	SRR3341181	10	2425	8	468
50	50A;50C	12	2197	7.5	181.5
32	32A	0	0	0	0
Mel218	SRR2672890	2	544	2	12
CR6161	SRR3341185	6	1088	4	116
Pat46	SRR2679013	1	272	1	1
Pat165	SRR2589694	1	0	0	0
LSD6819	SRR3341209	1	272	0	0
Hugo_Pt18	SRR3083859	1	272	1	2
PGDX3147	PGDX3147T_Ex	2	194	1	40
CR7623	SRR3341187	0	0	0	0
Pat60	SRR2776179	4	272	1	39
DM010	SRR6431461	5	1082	4	142
PGDX4397	PGDX4397T_Ex	3	544	2	62
HE3202	SRR2648123	4	1112	4	169
Pat147	SRR2774969	3	816	1	2
Pat151	SRR2775456	2	272	1	5
PGDX4127	PGDX4127T_Ex	9	1632	5	171
LSDNR1650	SRR3341213	0	0	0	0
Hugo_Pt26	SRR3083843	4	816	2	70
Pat62	SRR2678485	11	805	4	58
PD_025	SRR6461173	1	272	1	72
Pat118	SRR2777738	2	544	1	5
RCC_39	SRR6468348	0	0	0	0
21	21C	4	272	1	40
Pat79	SRR2757072	1	0	0	0
PGDX3146	PGDX3146T_Ex	17	3616	13	790
SC6470	SRR2648153	1	194	1	11
Pat73	SRR2772697	2	544	2	140
PD_015	SRR6491482	1	0	0	0
11025-12	Pem12T	0	0	0	0
CR22640	SRR3341177	1	0	0	0
FR9547	SRR2648117	0	0	0	0
SR070761	SRR2648155	1	0	0	0
NR8815	SRR3341249	5	1143	4	116
PGDX3785	PGDX3785T_Ex	12	2720	10	390
Pat29	SRR2773533	5	1037	3	238
RCC_11	SRR6468307	0	0	0	0
PR4035	SRR3341267	3	816	3	130
Pat170	SRR2679085	3	544	2	49
P54	SRR5149299	2	544	2	121
Pat129	SRR2768297	1	272	1	49
33	33A;33C	2.5	544	2	50
RCC_52	SRR6504588	1	272	0	0
Pat83	SRR2703695	1	272	1	4
LSD2057	SRR3341201	2	272	1	4
SD5934	SRR3341289	1	272	0	0
NR4045	SRR3341229	4	816	3	146
Pat160	SRR2778175	1	272	1	6
7	7A;7D	0	0	0	0
Pat78	SRR2589276	1	181	1	54
DM009	SRR6431459	2	544	2	40
P5	SRR5149289	3	544	2	6
Hugo_Pt37	SRR4289742	3	816	3	70
37	37B	0	0	0	0
WA7899	SRR2648163	0	0	0	0
MA7027	SRR2648135	1	272	1	72
ZA6505	SRR2648167	0	0	0	0
PD_021	SRR6461163	1	251	1	10
JB112852	SRR2648125	0	0	0	0
NR9765	SRR3341261	1	272	1	33
19	19D	14	3302	11	738
PGDX3783	PGDX3783T_Ex	0	0	0	0
PGDX3145	PGDX3145T_Ex	7	1698	6	149
14	1016452-2	5	1154	4	95
RCC_509214	SRR6450231	0	0	0	0
PGDX6334	PGDX6334T_Ex_TGACCA	3	194	1	28
AU5884	SRR2648105	0	0	0	0
PD_018	SRR6461150	1	272	1	46
Pat101	SRR2760983	3	544	2	65
DM014	SRR6431467	5	544	2	69
PGDX3162	PGDX3162T_Ex	11	1681	6	293
DM016	SRR6431471	0	0	0	0
Pat38	SRR2661602	7	1360	5	38
Pat131	SRR2780177	0	0	0	0
Hugo_Pt1	SRR3083866	5	544	2	69
Pat174	SRR2891925	5	816	2	18
PGDX6340	PGDX6340T_Ex_GCCAAT	5	1060	4	239
11025-26	Pem26T	0	0	0	0
Pat121	SRR2588549	0	0	0	0
Pat04	SRR2723814	2	272	1	33
P18	SRR5149293	1	194	1	14
Pat36	SRR2771331	0	0	0	0
Pat159	SRR2777240	6	0	0	0
Hugo_Pt34	SRR4289736	0	0	0	0
45	45C;45E	5	1224	2.5	60.5
ZA6965	SRR2648169	0	0	0	0
KA3947	SRR2648127	1	272	1	1
11	997065-5	2	272	1	49
M4945	SRR2648133	1	194	1	20
LO5004	SRR2648131	1	194	1	27
CR1509	SRR3341175	4	816	3	57
P7	SRR5149290	0	0	0	0
DM012	SRR6431463	0	0	0	0
7	980720-34	0	0	0	0
Pat163	SRR2740217	2	545	2	72
Hugo_Pt17	SRR4289723	6	1360	5	35
CRNR2472	SRR3341195	2	272	1	84
RCC_371982	SRR6450222	0	0	0	0
PGDX3799	PGDX3799T_Ex	5	351	1	9
DM020	SRR6431479	3	544	2	22
Hugo_Pt11	SRR4289719	3	816	3	49
Pat76	SRR2668212	0	0	0	0
Pat06	SRR2675035	1	272	1	6
29	29C	4	1154	3	74
5	5A	3	544	2	4
Pat02	SRR2773166	3	544	2	98
CR06670	SRR3341173	4	544	2	48
PGDX3156	PGDX3156T_Ex	2	272	1	8
Pat07	SRR2779374	1	272	1	30
Pat55	SRR2777872	4	816	3	109
SD6494	SRR3341293	5	826	3	78
Pat27	SRR2681131	1	272	1	4
Pat128	SRR2709858	1	272	1	48
4	966214-4	1	272	1	62
NI9507	SRR2648137	2	272	1	39
P23	SRR5149295	0	0	0	0
IM_002	SRR6461147	0	0	0	0
Pat70	SRR2769286	1	272	1	30
PGDX4947	PGDX4947T_Ex_ATGTCA	3	194	1	28
8	982746-6	3	544	2	59
PGDX3154	PGDX3154T_Ex	10	2176	8	303
RCC.PD1.DNA.1101	SRR6461171	1	493	1	21
Pat132	SRR2674312	4	882	2	23
Pat17	SRR2770067	2	544	2	4
RCC_1	SRR6468332	1	317	1	10
Pat67	SRR2771975	1	272	0	0
Pat81	SRR2707236	3	816	3	74
NR3549	SRR3341225	0	0	0	0

## Sheet: Supplementary Table S4
Supplementary Table S4: Modified neoepitope burdens. The “Patient” column indicates the patient identifier, and the “Tumor_ID” column indicates the tumor sample identifier(s); for patients with more than one tumor sample, median values are presented in subsequent columns of the table. The “Epitope_by_mismatch_burden” column sums for each neopeptide the number of amino acids changes it contains. T…
Patient	Tumor	Epitope_by_mismatch_burden	Epitope_by_allele_burden	Epitope_by_expression_burden	Epitope_by_TCGA_burden	Epitope_by_mismatch_and_allele_burden	Epitope_by_mismatch_and_expression_burden	Epitope_by_mismatch_and_TCGA_burden	Epitope_by_allele_and_expression_burden	Epitope_by_allele_and_TCGA_burden	Epitope_by_mismatches_alleles_and_expression_burden	Epitope_by_mismatches_alleles_and_TCGA_burden
Mel21	SRR2672888;SRR2673015;SRR2673095	547746	141560	299393	23197	547891	1033021	102314	299525	23205	1033282	102330
Mel218	SRR2672890	1145420	267141	615460	62113	1145781	2545377	330466	615825	62149	2546156	330527
Mel38	SRR2672866;SRR2673115	182409	70073.5	150988	8790.5	182436	414512	20051	151034	8794	414606	20056.5
P9	SRR5149288	131953	27774	NA	8039	131967	NA	33477	NA	8042	NA	33482
P16	SRR5149298	1166708	345573	NA	80045	1167239	NA	276127	NA	80102	NA	276244
P22	SRR5149294	1113187	169344	NA	54337	1113321	NA	319760	NA	54343	NA	319777
P47	SRR5149292	1086388	589974	NA	81813	1087137	NA	168173	NA	81873	NA	168268
P46	SRR5149300	179208	91219	NA	11453	179222	NA	24386	NA	11453	NA	24386
P54	SRR5149299	287779	141711	NA	18756	288010	NA	59550	NA	18771	NA	59576
P50	SRR5149287	1810420	1006638	NA	112930	1812364	NA	231689	NA	113089	NA	231937
P6	SRR5149296	132269	31164	NA	2542	132320	NA	4900	NA	2542	NA	4900
P24	SRR5149301	524776	302664	NA	34793	524921	NA	60979	NA	34799	NA	60993
P31	SRR5149286	449415	153799	NA	22831	449494	NA	81676	NA	22836	NA	81695
P18	SRR5149293	103499	33040	NA	4253	103499	NA	7712	NA	4253	NA	7712
P7	SRR5149290	61514	16305	NA	2482	61642	NA	3782	NA	2487	NA	3786
P23	SRR5149295	209604	38867	NA	9061	209607	NA	53027	NA	9061	NA	53027
P37	SRR5149297	305890	59591	NA	12023	305993	NA	70905	NA	12030	NA	70926
P5	SRR5149289	191943	100636	NA	11906	191961	NA	19152	NA	11908	NA	19158
P25	SRR5149291	134837	66118	NA	6436	134879	NA	10818	NA	6439	NA	10821
PGDX3150	PGDX3150T_Ex	20184044	2823237	NA	327638	20193642	NA	2450375	NA	328027	NA	2451759
PGDX3162	PGDX3162T_Ex	2525002	631391	NA	74243	2526072	NA	311587	NA	74285	NA	311690
PGDX3154	PGDX3154T_Ex	6446182	1360258	NA	167967	6459894	NA	843384	NA	168605	NA	845430
PGDX3148	PGDX3148T_Ex	1518805	481100	NA	61759	1519215	NA	201536	NA	61790	NA	201615
PGDX3146	PGDX3146T_Ex	2995820	803174	NA	90801	2997418	NA	314006	NA	90892	NA	314203
PGDX3157	PGDX3157T_Ex	319324	61187	NA	4369	319353	NA	24838	NA	4371	NA	24840
PGDX3149	PGDX3149T_Ex	246335	62738	NA	5394	246362	NA	29085	NA	5396	NA	29094
PGDX3156	PGDX3156T_Ex	1727162	393907	NA	65917	1727571	NA	301519	NA	65952	NA	301600
PGDX3158	PGDX3158T_Ex	174038	44366	NA	4629	174069	NA	20790	NA	4632	NA	20796
PGDX3151	PGDX3151T_Ex	5144073	701727	NA	60563	5144468	NA	470219	NA	60571	NA	470261
PGDX3145	PGDX3145T_Ex	13322318	1894743	NA	193363	13325163	NA	1357714	NA	193482	NA	1358025
PGDX3153	PGDX3153T_Ex	2506191	675899	NA	66675	2508464	NA	229205	NA	66774	NA	229410
PGDX3161	PGDX3161T_Ex	21720550	2981684	NA	411570	21725356	NA	3159753	NA	411810	NA	3160455
PGDX3144	PGDX3144T_Ex	978446	288957	NA	39302	978480	NA	163209	NA	39306	NA	163216
PGDX3147	PGDX3147T_Ex	1044230	151090	NA	29645	1044284	NA	188223	NA	29648	NA	188232
PGDX6334	PGDX6334T_Ex_TGACCA	995393	289606	NA	50832	995720	NA	172138	NA	50911	NA	172226
PGDX4398	PGDX4398T_Ex	1681396	666594	NA	77042	1681667	NA	176383	NA	77059	NA	176417
PGDX3799	PGDX3799T_Ex	2113162	541449	NA	63596	2113267	NA	255958	NA	63604	NA	255976
PGDX3784	PGDX3784T_Ex	1304917	355171	NA	36194	1305158	NA	122876	NA	36205	NA	122901
PGDX3783	PGDX3783T_Ex	16797	3904	NA	771	16797	NA	3735	NA	771	NA	3735
PGDX6340	PGDX6340T_Ex_GCCAAT	555531	255809	NA	78832	555794	NA	156918	NA	78875	NA	156990
PGDX3787	PGDX3787T_Ex	1840417	568450	NA	69141	1840551	NA	199116	NA	69153	NA	199133
PGDX4137	PGDX4137T1_Ex;PGDX4137T_Ex	2126181	481062	NA	59163.5	2.12637e+06	NA	265792	NA	59176.5	NA	265822
PGDX4397	PGDX4397T_Ex	765840	199972	NA	25650	765946	NA	107405	NA	25660	NA	107426
PGDX3785	PGDX3785T_Ex	3713377	1292482	NA	150986	3715110	NA	419400	NA	151108	NA	419621
PGDX4127	PGDX4127T_Ex	1506200	459096	NA	65835	1507271	NA	218189	NA	65914	NA	218333
PGDX4311	PGDX4311T_Ex	1114556	298340	NA	36066	1114756	NA	136698	NA	36079	NA	136725
PGDX4947	PGDX4947T_Ex_ATGTCA	890246	254525	NA	32627	890509	NA	109633	NA	32669	NA	109679
Hugo_Pt15	SRR3083845	468255	191942	401294	30250	468341	1001387	110872	401374	30255	1001519	110888
Hugo_Pt28	SRR3083851	274991	151768	333090	28315	275022	602819	57285	333127	28317	602875	57287
Hugo_Pt5	SRR3083857	257275	115231	244641	29265	257281	526374	99242	244646	29265	526388	99242
Hugo_Pt35	SRR4289738	181442	98558	204552	12732	181465	363392	24193	204586	12732	363451	24193
Hugo_Pt17	SRR4289723	503610	267504	NA	33694	503617	NA	82166	NA	33696	NA	82168
Hugo_Pt6	SRR3083863	173332	80074	202587	12849	173385	445023	34029	202659	12854	445170	34036
Hugo_Pt8	SRR4289715	6270119	3719965	9221773	909171	6271176	15514853	1531689	9223459	909315	15517650	1531911
Hugo_Pt16	SRR4289721	392508	173859	381919	23961	392508	855861	78751	381919	23961	855861	78751
Hugo_Pt12	SRR3083882	103724	28800	59666	5824	103728	178684	31669	59667	5824	178685	31669
Hugo_Pt36	SRR4289740	152492	47634	NA	4640	152553	NA	14554	NA	4640	NA	14554
Hugo_Pt30	SRR4289728	338397	166616	NA	32032	338620	NA	101899	NA	32074	NA	102022
Hugo_Pt33	SRR4289734	389697	204601	NA	27101	389737	NA	47160	NA	27101	NA	47160
Hugo_Pt9	SRR3083849	253552	140007	308941	14631	253617	527853	28686	309030	14641	527985	28698
Hugo_Pt31	SRR4289730	510109	202308	469488	26919	510152	1299862	69663	469543	26923	1299940	69669
Hugo_Pt26	SRR3083843	516429	304126	NA	24661	516645	NA	50608	NA	24676	NA	50627
Hugo_Pt34	SRR4289736	175903	48965	NA	13377	175916	NA	43233	NA	13378	NA	43234
Hugo_Pt18	SRR3083859	176169	91282	NA	11891	176281	NA	24392	NA	11898	NA	24406
Hugo_Pt13	SRR3083855	326118	146632	318075	13270	326161	707500	37907	318119	13274	707566	37920
Hugo_Pt1	SRR3083866	1062104	621011	1392922	68810	1062865	2395578	151883	1393956	68867	2397275	151994
Hugo_Pt24	SRR3083853	355120	149659	NA	18855	355135	NA	51197	NA	18855	NA	51197
Hugo_Pt2	SRR3083839	919921	526296	1131974	53775	920927	1941758	108319	1133506	53857	1943990	108442
Hugo_Pt23	SRR3083874	142679	71830	147515	9982	142689	292679	17219	147528	9984	292693	17221
Hugo_Pt29	SRR3083876	243927	89106	199797	21538	243965	534724	57292	199843	21544	534799	57309
Hugo_Pt37	SRR4289742	269101	155786	344664	16879	269177	570182	31571	344780	16883	570341	31583
Hugo_Pt21	SRR3083861	161780	74339	NA	11288	161862	NA	36262	NA	11294	NA	36281
Hugo_Pt4	SRR3083837	1870730	1054815	2355755	122239	1871712	4090526	245508	2357024	122310	4092691	245650
Hugo_Pt22	SRR3083878	144352	62806	152763	6980	144386	327508	17787	152825	6980	327628	17787
Hugo_Pt7	SRR3083870	634342	338781	674823	34383	634606	1167188	61303	675092	34402	1167579	61324
Hugo_Pt25	SRR3083880	112093	41814	94075	12069	112099	227303	34222	94077	12069	227309	34222
Hugo_Pt20	SRR3083872	339702	170350	382302	22163	339767	767555	39947	382354	22164	767712	39948
Hugo_Pt38	SRR4289744	116112	38317	94109	3584	116129	267667	7112	94145	3584	267721	7112
Hugo_Pt32	SRR4289732	159392	79684	170151	8037	159963	323004	15274	170898	8073	324144	15321
Hugo_Pt19	SRR3083847	329841	176267	343404	20687	329882	662032	54688	343443	20688	662093	54692
Hugo_Pt10	SRR4289717	159270	70627	176469	12899	159275	405252	25141	176470	12899	405256	25141
Hugo_Pt14	SRR3083868	728243	411561	904155	45898	728463	1503849	81601	904483	45909	1504308	81621
Hugo_Pt3	SRR3083841	1035454	389076	NA	53455	1035486	NA	173896	NA	53458	NA	173901
Hugo_Pt27	SRR4289725;SRR4289726	1.12889e+06	683776	1.51989e+06	65432.5	1.13235e+06	2.51248e+06	116010	1525827	65641.5	2.52017e+06	116290
Hugo_Pt11	SRR4289719	205975	83933	NA	12719	205994	NA	33020	NA	12720	NA	33021
RCC_504642	SRR6450228	190886	78185	NA	16277	191097	NA	33299	NA	16278	NA	33300
PD_030	SRR6461169	354062	141229	NA	28136	354133	NA	55279	NA	28142	NA	55289
RCC_281066	SRR6450224	540325	202734	NA	47124	542263	NA	109161	NA	47370	NA	109485
RCC.PD1.DNA.944	SRR6461175	102128	23840	NA	5184	102141	NA	26120	NA	5187	NA	26126
RCC.PD1.DNA.1101	SRR6461171	73388	15554	NA	2584	73410	NA	10249	NA	2585	NA	10249
IM_001	SRR6504838	52111	12454	NA	1071	52135	NA	3524	NA	1073	NA	3530
RCC_51974086	SRR6450227	333019	123095	NA	32930	333050	NA	89432	NA	32934	NA	89442
15349_CCPM_0600855	SRR6450189	180277	98725	NA	28218	180367	NA	45513	NA	28232	NA	45527
IM_002	SRR6461147	999837	144218	NA	25454	1000651	NA	178458	NA	25497	NA	178620
15349_CCPM_0600862	SRR6461181;SRR6504582	111130	47583	NA	6848.5	111144	NA	13514.5	NA	6850	NA	13516.5
RCC.PD1.DNA.1137	SRR6461180	7718041	1095612	NA	168054	7718498	NA	1252659	NA	168087	NA	1252746
RCC.PD1.DNA.949	SRR6461177	210250	40940	NA	3637	210251	NA	20826	NA	3637	NA	20826
RCC_472770	SRR6450230	539340	234424	NA	46643	539352	NA	101448	NA	46647	NA	101454
RCC_390392	SRR6450229	534513	139753	NA	27307	534591	NA	101497	NA	27320	NA	101528
RCC_470874	SRR6450226	287591	141808	NA	39543	287613	NA	66784	NA	39546	NA	66790
RCC_371982	SRR6450222	590687	150825	NA	24725	590850	NA	110332	NA	24738	NA	110376
RCC_509214	SRR6450231	302276	98376	NA	23225	302276	NA	47554	NA	23225	NA	47554
RCC.PD1.DNA.1026	SRR6461164	75751	18783	NA	1071	75771	NA	5522	NA	1071	NA	5522
RCC_554652	SRR6450232	231936	104902	NA	23235	231977	NA	47182	NA	23242	NA	47191
RCC_102	SRR6468374	486527	237339	NA	51582	486565	NA	105986	NA	51585	NA	105993
RCC_84	SRR6468336	498226	259230	NA	55270	498295	NA	95157	NA	55280	NA	95176
PD_022	SRR6461155	243565	77850	151878	15920	243577	446506	43545	151883	15920	446524	43545
RCC_114	SRR6468328	323585	161036	NA	37952	323646	NA	65184	NA	37954	NA	65185
PD_021	SRR6461163	346320	140798	362996	26612	346325	869764	79867	363005	26614	869775	79869
PD_012	SRR6504840	424155	198137	470417	46381	424303	954608	90642	470653	46405	954936	90669
RCC_20	SRR6468302	3762846	1530862	NA	361111	3762849	NA	790575	NA	361111	NA	790575
RCC_10	SRR6468339	322434	163927	NA	26129	322479	NA	45498	NA	26134	NA	45507
RCC_97	SRR6468341	469183	262510	NA	69295	469701	NA	158210	NA	69355	NA	158346
PD_010	SRR6461165	282497	97676	225298	24922	282970	697628	71242	225675	24984	698647	71447
PD_023	SRR6504581	271725	94926	226642	19460	271864	682216	45522	226747	19462	682456	45524
RCC_85	SRR6468330	3441253	752021	NA	129635	3441695	NA	573126	NA	129670	NA	573211
RCC_1	SRR6468332	364928	188553	NA	33244	364976	NA	77295	NA	33248	NA	77301
RCC_15	SRR6468326	163582	69618	NA	12543	163611	NA	25042	NA	12547	NA	25051
RCC_119	SRR6468311	2972352	1133321	NA	247836	2972353	NA	621872	NA	247836	NA	621872
PD_007	SRR6889242	280883	114048	263918	27834	280883	609625	56116	263918	27834	609625	56116
PD_020	SRR6461168	304530	122718	316082	34856	304641	678374	86686	316273	34868	678695	86717
PD_011	SRR6461159	760119	275148	674145	55661	760413	1715647	151317	674512	55699	1716190	151371
PD_025	SRR6461173	473110	142243	325509	29776	473186	1195138	98701	325598	29784	1195301	98714
RCC_25	SRR6504586	229957	100956	NA	25278	229978	NA	54102	NA	25281	NA	54107
RCC_58	SRR6468321	447458	251058	NA	57987	447518	NA	118505	NA	57995	NA	118514
RCC_39	SRR6468348	244370	135210	NA	22502	244416	NA	36288	NA	22507	NA	36295
RCC_79	SRR6468316	631804	307468	NA	57303	631903	NA	116760	NA	57316	NA	116781
PD_014	SRR6461162	594702	218554	560715	40623	594788	1401263	97976	560816	40629	1401445	97986
PD_005	SRR6461166	264364	90979	196729	24114	264399	553937	47517	196775	24119	554007	47522
PD_026	SRR6461170	316669	129284	272243	22273	316685	628790	46661	272262	22274	628809	46662
PD_013	SRR6461172	294560	141966	340735	31398	294598	644638	55900	340783	31403	644707	55905
RCC_32	SRR6504589	364427	175772	NA	24541	364513	NA	51398	NA	24552	NA	51411
RCC_11	SRR6468307	1922527	634217	NA	113863	1929919	NA	350870	NA	114617	NA	352293
RCC_27	SRR6468375	235921	71530	NA	6628	235989	NA	36424	NA	6633	NA	36445
RCC_62	SRR6468347	302780	134164	NA	34965	302805	NA	74617	NA	34969	NA	74629
RCC_52	SRR6504588	566907	306190	NA	61494	567004	NA	119653	NA	61507	NA	119678
PD_024	SRR6461167	1514342	403284	917106	77860	1514637	3323603	266631	917344	77896	3324134	266713
PD_015	SRR6491482	409514	141623	375595	25079	409589	1024974	74605	375711	25089	1025216	74622
RCC_56	SRR6468373	115020	41248	NA	5521	115023	NA	12974	NA	5522	NA	12975
PD_019	SRR6504580	211770	95252	199867	23405	211781	504753	64568	199875	23409	504771	64574
PD_018	SRR6461150	338125	157909	380484	30252	338446	802423	54486	380954	30285	803138	54538
RCC_68	SRR6504583	2764110	1056354	NA	212093	2764260	NA	485337	NA	212109	NA	485370
SA9755	SRR2648147	2986428	564046	NA	160656	2987089	NA	840733	NA	160714	NA	840878
SB010944	SRR2648149	263542	65415	NA	10284	263593	NA	50010	NA	10288	NA	50024
GR0134	SRR2648119	113808	23970	NA	1241	113820	NA	5164	NA	1242	NA	5167
GR4788	SRR2648121	231971	54681	NA	12386	232020	NA	52295	NA	12395	NA	52324
R7495	SRR2648139	69831	29610	NA	8032	69852	NA	20308	NA	8040	NA	20318
ZA6505	SRR2648167	289324	93858	NA	26485	289324	NA	75901	NA	26485	NA	75901
FR9547	SRR2648117	191949	77927	NA	17915	192011	NA	48414	NA	17920	NA	48426
TU0428	SRR2648157	624453	177976	NA	40637	624821	NA	152816	NA	40678	NA	152902
SR070761	SRR2648155	1428749	213920	NA	59811	1428845	NA	415997	NA	59820	NA	416032
MA7027	SRR2648135	226996	80905	NA	21934	227009	NA	54538	NA	21936	NA	54543
M4945	SRR2648133	534043	132268	NA	39603	534103	NA	162101	NA	39609	NA	162110
ZA6965	SRR2648169	149266	34147	NA	6424	149297	NA	35299	NA	6430	NA	35313
SC0899	SRR2648151	340534	129126	NA	36440	340610	NA	122703	NA	36449	NA	122724
KA3947	SRR2648127	307875	113270	NA	28496	308094	NA	83017	NA	28534	NA	83093
WA7899	SRR2648163	172126	44318	NA	6767	172162	NA	21756	NA	6767	NA	21756
RI1933	SRR2648143	287377	136987	NA	19199	287391	NA	34068	NA	19202	NA	34071
DI6359	SRR2648113	317748	97359	NA	20332	318370	NA	58275	NA	20384	NA	58361
NI9507	SRR2648137	142808	52174	NA	19521	142815	NA	49810	NA	19523	NA	49818
LO3793	SRR2648129	135638	37416	NA	10867	135640	NA	29416	NA	10868	NA	29417
CU9061	SRR2648111	252888	104572	NA	25663	252986	NA	69942	NA	25670	NA	69951
RH090935	SRR2648141	282551	78841	NA	17696	282625	NA	64327	NA	17702	NA	64340
HE3202	SRR2648123	437977	198739	NA	54608	438044	NA	126462	NA	54612	NA	126468
SC6470	SRR2648153	125070	57882	NA	9167	125103	NA	18768	NA	9169	NA	18772
VA7859	SRR2648161	66069	9652	NA	2053	66096	NA	11565	NA	2053	NA	11565
CA9903	SRR2648109	1720585	307648	NA	101039	1720590	NA	563022	NA	101039	NA	563022
AU5884	SRR2648105	70799	24194	NA	4891	70823	NA	16928	NA	4897	NA	16941
RO3338	SRR2648145	188411	44539	NA	6626	188443	NA	22931	NA	6629	NA	22937
BL3403	SRR2648107	213008	37603	NA	10364	213033	NA	49160	NA	10367	NA	49162
LO5004	SRR2648131	75763	18323	NA	5988	75774	NA	30570	NA	5991	NA	30578
DM123062	SRR2648115	171387	43922	NA	12285	171404	NA	26377	NA	12287	NA	26379
Y2087	SRR2648165	11548531	1607707	NA	446804	11572705	NA	3003565	NA	448656	NA	3010115
VA1330	SRR2648159	118796	16749	NA	2905	118796	NA	15925	NA	2905	NA	15925
JB112852	SRR2648125	471657	83861	NA	25500	471677	NA	114832	NA	25503	NA	114839
AL4602	SRR2648103	295760	83274	NA	24301	295817	NA	84755	NA	24309	NA	84765
53	53A;53D	361850	174259	NA	25979.5	362090	NA	69266.5	NA	26000	NA	69298
31	31A	449415	153799	NA	22831	449494	NA	81676	NA	22836	NA	81695
16	16C;16D	1.24366e+06	342352	NA	77834	1.24424e+06	NA	275492	NA	77894.5	NA	275635
34	34A	1635161	825828	NA	129733	1635303	NA	281673	NA	129739	NA	281680
15	15C	946313	234235	NA	35759	946485	NA	139718	NA	35780	NA	139773
22	22A;22B	715580	113042	NA	35252.5	715662	NA	199451	NA	35258.5	NA	199467
3	3C;3D1;3D2	318191	91219	NA	11860	318220	NA	58805	NA	11861	NA	58806
47	47A;47D	672750	336295	NA	50662	673203	NA	120701	NA	50705.5	NA	120790
37	37B	305890	59591	NA	12023	305993	NA	70905	NA	12030	NA	70926
7	7A;7D	39480.5	9843.5	NA	1377	39572	NA	2039	NA	1380	NA	2041
33	33A;33C	205924	111944	NA	11085.5	205937	NA	21152	NA	11086	NA	21155
19	19D	2051192	1109422	NA	195602	2051385	NA	386127	NA	195629	NA	386157
24	24C	524776	302664	NA	34793	524921	NA	60979	NA	34799	NA	60993
32	32A	110133	23763	NA	2610	110150	NA	5924	NA	2611	NA	5925
26	26C;26E	725116	369260	NA	45730	725218	NA	86117.5	NA	45739.5	NA	86129
25	25A;25C	157192	73367	NA	7892	157244	NA	13827.5	NA	7895	NA	13830.5
12	12A	194785	72683	NA	12405	194837	NA	29259	NA	12406	NA	29260
9	9A;9C;9D	229604	44399	NA	8039	229660	NA	33477	NA	8042	NA	33482
20	20A;20E	1296229	727548	NA	97335	1300481	NA	193764	NA	97770.5	NA	194471
49	49E	735615	416055	NA	57467	735778	NA	110959	NA	57475	NA	110974
4	4D	391678	91187	NA	26704	391776	NA	69217	NA	26708	NA	69221
41	41A	146083	48757	NA	8266	146263	NA	21551	NA	8284	NA	21579
29	29C	209092	94595	NA	13866	209100	NA	28942	NA	13866	NA	28942
1	1D	180173	50274	NA	8176	180186	NA	34860	NA	8177	NA	34863
28	28A;28D	411456	178565	NA	22813.5	411492	NA	61249	NA	22813.5	NA	61249
2	2E	171432	68052	NA	10239	171494	NA	32593	NA	10244	NA	32603
50	50A;50C	1722597	964224	NA	105348	1724442	NA	207110	NA	105496	NA	207330
54	54A;54C	295400	144246	NA	16589.5	295639	NA	49655	NA	16606	NA	49689
42	42E	162963	70937	NA	11956	163067	NA	39594	NA	11965	NA	39616
6	6B	132269	31164	NA	2542	132320	NA	4900	NA	2542	NA	4900
23	23A	209604	38867	NA	9061	209607	NA	53027	NA	9061	NA	53027
45	45C;45E	1.10873e+06	592843	NA	86746.5	1108812	NA	179212	NA	86751.5	NA	179222
18	18A;18C	78404.5	29139	NA	4025.5	78405	NA	6970	NA	4025.5	NA	6970
5	5A	191943	100636	NA	11906	191961	NA	19152	NA	11908	NA	19158
21	21C	421801	196110	NA	23944	421894	NA	54879	NA	23951	NA	54898
SD5038	SRR3341285	208752	97011	215591	9613	208836	422717	17133	215703	9619	422900	17149
NR5784	SRR3341239	37644	19976	44393	5298	37663	91129	18258	44428	5301	91209	18266
CR6126	SRR3341183	298727	156258	358483	21606	298815	672405	38433	358662	21623	672622	38463
NR8815	SRR3341249	934445	499160	NA	81302	934464	NA	227659	NA	81305	NA	227666
NR9705	SRR3341259	37836	11966	24724	2854	37843	79841	11203	24733	2856	79853	11208
CR4880	SRR3341181	1906733	1046367	NA	149351	1907541	NA	258988	NA	149411	NA	259081
CR06670	SRR3341173	340706	167961	NA	26766	340833	NA	64710	NA	26777	NA	64733
CR22640	SRR3341177	1209316	275200	NA	75823	1209365	NA	388289	NA	75824	NA	388289
PR4035	SRR3341267	300250	154447	NA	29769	300346	NA	78585	NA	29776	NA	78600
NR8727	SRR3341247	564147	97013	NA	12122	564200	NA	53156	NA	12122	NA	53156
CR04885	SRR3341171	7421398	1413798	NA	231475	7423398	NA	1320981	NA	231614	NA	1321355
LSDNR9298	SRR3341217	709165	357255	NA	52509	709467	NA	117775	NA	52545	NA	117838
NR2137	SRR3341221	366661	192675	NA	33770	366844	NA	67895	NA	33791	NA	67931
NR9521	SRR3341257	564776	295574	605401	33994	564883	1135320	82106	605513	34001	1135533	82119
NR6842	SRR3341245	127863	39968	NA	8932	127967	NA	25744	NA	8945	NA	25770
LSDNR3086	SRR3341215	212713	54398	NA	9565	212721	NA	43628	NA	9567	NA	43632
CRNR4941	SRR3341197	83673	36926	NA	6041	83747	NA	22804	NA	6048	NA	22814
SD2051	SRR3341281	33313	12594	29529	1921	33322	72520	3630	29541	1921	72547	3630
PR03803	SRR3341263	12666716	1763200	NA	340575	12667293	NA	2383351	NA	340603	NA	2383419
PR4077	SRR3341271	860850	479258	NA	47050	860965	NA	93704	NA	47057	NA	93713
NR3156	SRR3341223	190114	57115	NA	14653	190117	NA	53739	NA	14654	NA	53742
PR4092	SRR3341275	1278547	726348	NA	207752	1278589	NA	381021	NA	207757	NA	381028
NR4631	SRR3341233	515883	312876	713981	43849	516026	1197764	88256	714206	43870	1198091	88304
CR3665	SRR3341179	222528	74416	NA	14045	222542	NA	42643	NA	14047	NA	42645
NR9445	SRR3341253	251715	104886	NA	26666	251789	NA	62668	NA	26682	NA	62700
SD5118	SRR3341287	546146	151071	NA	40570	546163	NA	166128	NA	40573	NA	166136
NR6721	SRR3341243	149911	48676	NA	8873	150244	NA	33483	NA	8896	NA	33525
NR4083	SRR3341231	194423	103507	NA	11495	194474	NA	24782	NA	11498	NA	24785
LSD4691	SRR3341205	85231	44546	NA	14474	85252	NA	37011	NA	14477	NA	37017
NR9449	SRR3341255	168672	86187	184521	13818	168737	384376	29402	184587	13825	384499	29413
LSD2057	SRR3341201	231408	87990	NA	14613	231449	NA	45151	NA	14615	NA	45157
SD1494	SRR3341279	550993	271267	535400	37843	551176	982347	84955	535646	37849	982630	84961
SD0346	SRR3341277	359758	189946	451193	28808	359813	823431	67780	451268	28815	823579	67795
CRNR2472	SRR3341195	344867	181684	NA	21766	345309	NA	43939	NA	21792	NA	43991
CR1509	SRR3341175	391404	179393	365963	25074	391496	764991	48288	366039	25080	765105	48303
CR9306	SRR3341189	827302	421873	NA	69062	827395	NA	150948	NA	69071	NA	150974
LSD4744	SRR3341207	614911	324107	NA	40696	615232	NA	92648	NA	40725	NA	92717
NR9765	SRR3341261	788076	121871	NA	40450	788241	NA	277659	NA	40466	NA	277706
PR4091	SRR3341273	256510	107013	NA	20751	256633	NA	68904	NA	20757	NA	68909
CR7623	SRR3341187	210299	111915	263060	27329	210449	484193	51409	263247	27348	484482	51442
LSDNR1120	SRR3341211	263643	147556	NA	27944	263695	NA	48806	NA	27952	NA	48820
CR6161	SRR3341185	562271	245504	NA	32594	562390	NA	78047	NA	32602	NA	78062
NR6689	SRR3341241	120858	27740	NA	7124	121013	NA	33535	NA	7133	NA	33550
SD6494	SRR3341293	521556	307533	644140	52323	521766	1096124	92393	644414	52348	1096487	92417
NR4810	SRR3341235	230902	121971	266106	17028	231019	532783	30688	266245	17035	533028	30698
NR3549	SRR3341225	224493	122699	294265	25397	225136	521295	48264	295357	25495	522839	48387
NR4949	SRR3341237	275206	162440	NA	28977	275217	NA	49948	NA	28978	NA	49952
SD6336	SRR3341291	191633	105834	230608	16466	191683	417627	43492	230679	16469	417712	43499
SD7357	SRR3341295	762247	390514	783835	47327	762391	1566551	154213	783965	47341	1566782	154262
CR9699	SRR3341191	876779	440070	911646	49282	876886	1817961	114603	911791	49291	1818210	114623
CR0095	SRR3341169	162670	88944	NA	13915	162720	NA	24039	NA	13919	NA	24047
CRNR0244	SRR3341193	285181	156701	NA	20529	285230	NA	40741	NA	20533	NA	40758
LSD3484	SRR3341203	288496	148152	NA	27177	288615	NA	66287	NA	27195	NA	66323
SD2056	SRR3341283	73000	41657	100766	6160	73015	170569	10355	100806	6163	170618	10361
SD5934	SRR3341289	94812	52337	NA	8452	94819	NA	21901	NA	8454	NA	21903
LSD6819	SRR3341209	180238	78594	NA	9949	180302	NA	29868	NA	9950	NA	29869
NR9341	SRR3341251	153817	78979	NA	8684	153830	NA	13733	NA	8684	NA	13733
NR1867	SRR3341219	147702	54295	NA	9207	147715	NA	33237	NA	9207	NA	33237
NR4018	SRR3341227	96664	46168	NA	5409	96682	NA	8900	NA	5410	NA	8901
LSDNR1650	SRR3341213	79481	18740	NA	8234	79482	NA	38629	NA	8234	NA	38629
PR12117	SRR3341265	809445	362266	NA	50501	809559	NA	142571	NA	50508	NA	142590
PR4046	SRR3341269	121107	52345	NA	7122	121231	NA	29032	NA	7124	NA	29035
NR4045	SRR3341229	241462	126843	NA	17875	241509	NA	35676	NA	17876	NA	35677
LSD0167	SRR3341199	232343	116729	280751	13177	232433	550800	25993	280894	13184	551083	26006
11025-17	Pem17T	434944	76309	NA	7287	435396	NA	49771	NA	7304	NA	49823
11025-27	Pem27T	122641	29874	NA	8024	122645	NA	48763	NA	8024	NA	48763
11025-10	Pem10T	294888	55745	NA	11878	294964	NA	63636	NA	11883	NA	63654
11025-35	Pem35T	279784	51582	NA	10800	279841	NA	53960	NA	10807	NA	53972
11025-1	Pem1T	1933772	538137	NA	115990	1934011	NA	469340	NA	116015	NA	469392
11025-13	Pem13T	261194	45076	NA	5756	261207	NA	34757	NA	5756	NA	34757
11025-26	Pem26T	322614	53297	NA	5869	322649	NA	41106	NA	5874	NA	41125
11025-22	Pem22T	390761	93443	NA	21911	390904	NA	73891	NA	21921	NA	73899
11025-12	Pem12T	159206	36416	NA	5286	159305	NA	28121	NA	5289	NA	28126
11025-28	Pem28T	282360	51073	NA	6319	282389	NA	38389	NA	6320	NA	38394
Pat167	SRR2767414	2996370	414925	NA	97471	2997319	NA	708470	NA	97540	NA	708675
Pat28	SRR2771788	1215893	590770	1533346	140380	1216203	3115361	275370	1533863	140418	3116171	275427
Pat76	SRR2668212	234539	76128	NA	14755	234590	NA	59519	NA	14756	NA	59523
Pat165	SRR2589694	31631125	4432245	NA	1211886	31651242	NA	8516391	NA	1213499	NA	8521440
Pat47	SRR2772900	162059	49219	100205	9233	162198	349836	27505	100331	9240	350093	27530
Pat55	SRR2777872	557563	183605	NA	37068	558011	NA	121424	NA	37097	NA	121486
Pat133	SRR2670626	6320321	934046	NA	229722	6320763	NA	1616922	NA	229758	NA	1617027
Pat73	SRR2772697	171897	86456	NA	12582	171904	NA	24300	NA	12587	NA	24305
Pat170	SRR2679085	10405987	1469784	NA	334989	10408061	NA	2383998	NA	335146	NA	2384388
Pat14	SRR2774418	69674	18554	41230	4209	69700	162491	8186	41260	4210	162557	8187
Pat32	SRR2689326	1852307	398660	NA	96918	1852563	NA	551460	NA	96948	NA	551548
Pat159	SRR2777240	22486320	3761828	NA	1135720	22487026	NA	6639669	NA	1135760	NA	6639812
Pat79	SRR2757072	136725	80642	187581	10301	136749	318264	22108	187617	10301	318305	22108
Pat17	SRR2770067	310847	98179	NA	23885	310856	NA	75533	NA	23888	NA	75534
Pat70	SRR2769286	227358	49131	NA	6372	227378	NA	30396	NA	6372	NA	30396
Pat56	SRR2774324	238114	44359	NA	6681	238159	NA	38056	NA	6681	NA	38056
Pat123	SRR2679057	612595	192639	415851	36870	612669	1335724	147355	415953	36874	1335919	147375
Pat100	SRR2741440	374593	160168	NA	20166	374721	NA	65981	NA	20171	NA	65986
Pat13	SRR2770259	229237	55121	NA	14263	229253	NA	67565	NA	14265	NA	67571
Pat124	SRR2747991	622257	160070	NA	23800	622537	NA	95726	NA	23823	NA	95781
Pat33	SRR2677297	368064	107846	260024	15901	368070	860057	80185	260032	15902	860067	80186
Pat128	SRR2709858	250130	59924	NA	16629	250130	NA	63710	NA	16629	NA	63710
Pat46	SRR2679013	343725	107000	227002	22524	343769	727081	90932	227077	22533	727187	90943
Pat67	SRR2771975	293327	53674	NA	8422	293549	NA	32462	NA	8439	NA	32511
Pat18	SRR2780332	166237	30876	NA	12768	166241	NA	88307	NA	12769	NA	88311
Pat166	SRR2665040	10649166	1442794	NA	324369	10649837	NA	2479800	NA	324423	NA	2479942
Pat151	SRR2775456	8756000	1433293	NA	424047	8756606	NA	2590393	NA	424112	NA	2590559
Pat59	SRR2779219	328391	105064	NA	16484	328520	NA	70324	NA	16498	NA	70360
Pat174	SRR2891925	710370	234715	NA	23090	710403	NA	69082	NA	23092	NA	69084
Pat49	SRR2777655	534587	220291	464275	29549	534668	1063552	110751	464380	29561	1063718	110775
Pat138	SRR2772131	8281876	2007912	NA	573889	8283437	NA	2372900	NA	574083	NA	2373325
Pat92	SRR2775168	23975308	3245016	NA	938321	23981128	NA	6792342	NA	938842	NA	6793792
Pat44	SRR2588166	442197	107595	210875	12166	442215	939736	52815	210900	12168	939768	52817
Pat78	SRR2589276	97246751	13217124	NA	3571314	97246751	NA	25838135	NA	3571314	NA	25838135
Pat04	SRR2723814	293524	115570	275849	27757	293690	746897	82422	276018	27766	747285	82432
Pat101	SRR2760983	1833085	262519	NA	43757	1833246	NA	322383	NA	43764	NA	322404
Pat160	SRR2778175	10418208	1568355	NA	386748	10423288	NA	2635521	NA	387103	NA	2636618
Pat57	SRR2778237	548801	95356	NA	23886	548883	NA	105837	NA	23890	NA	105846
Pat90	SRR2588053	322713	90450	191072	17106	322743	637180	84584	191119	17106	637241	84584
Pat82	SRR2682345	523930	169865	NA	36967	523961	NA	112963	NA	36974	NA	112964
Pat19	SRR2779901	292173	143782	336023	21276	292505	656347	56547	336432	21291	657091	56575
Pat127	SRR2772054	726511	131348	NA	25378	726608	NA	148150	NA	25380	NA	148154
Pat157	SRR2706574	14005420	1923513	NA	430912	14006225	NA	3179514	NA	430978	NA	3179688
Pat81	SRR2707236	57764	31269	75795	4590	57791	133295	6894	75830	4592	133346	6899
Pat103	SRR2589478	760410	212808	NA	34184	760502	NA	154206	NA	34192	NA	154220
Pat74	SRR2680970	569181	186677	NA	18930	569432	NA	62041	NA	18944	NA	62068
Pat175	SRR2770550	221939	42186	NA	4230	221955	NA	13288	NA	4230	NA	13288
Pat121	SRR2588549	32931649	4335606	NA	936345	32933476	NA	7214996	NA	936482	NA	7215389
Pat11	SRR2773334	946079	545942	NA	64681	946135	NA	134053	NA	64687	NA	134063
Pat27	SRR2681131	256503	46021	107268	7236	256503	601167	44516	107268	7236	601167	44516
Pat148	SRR2753967	19263739	3034586	NA	798445	19283762	NA	5173352	NA	799887	NA	5178036
Pat131	SRR2780177	7099002	1041660	NA	300328	7099618	NA	1907851	NA	300391	NA	1907970
Pat83	SRR2703695	166622	31670	67262	7347	166625	323460	46500	67263	7348	323463	46503
Pat130	SRR2778365	584120	128628	NA	15555	584271	NA	69849	NA	15563	NA	69857
Pat117	SRR2677533	735224	271228	NA	45490	735340	NA	190510	NA	45507	NA	190548
Pat80	SRR2765066	225612	75076	199728	18702	225628	656520	48821	199751	18707	656585	48826
Pat126	SRR2772336	1434173	315255	725474	56901	1434368	3492296	326118	725660	56920	3492794	326189
Pat135	SRR2731893	3907132	556486	NA	59590	3909198	NA	432638	NA	59674	NA	432880
Pat03	SRR2587785	731660	171747	405664	38708	731670	1621501	138864	405687	38708	1621532	138864
Pat71	SRR2670951	514977	217109	NA	28409	515081	NA	68180	NA	28418	NA	68198
Pat24	SRR2663954	227998	39344	NA	561	228064	NA	2361	NA	561	NA	2361
Pat118	SRR2777738	519891	112065	240547	18154	519962	1122379	88912	240594	18155	1122576	88915
Pat98	SRR2588422	100820	21539	41039	2139	100833	162832	7299	41048	2139	162848	7299
Pat41	SRR2775592	267918	107185	183989	24868	267946	459325	93640	184014	24871	459374	93643
Pat37	SRR2773626	132556	48488	114095	6215	132562	268876	18146	114101	6215	268885	18146
Pat143	SRR2712344	6661477	1054947	NA	249824	6664511	NA	1773231	NA	250055	NA	1774105
Pat171	SRR2747280	29537260	4078719	NA	998260	29537911	NA	7049145	NA	998318	NA	7049325
Pat62	SRR2678485	1070659	430367	NA	85792	1071051	NA	248206	NA	85835	NA	248271
Pat113	SRR2661932	156663	81449	NA	13988	156672	NA	42513	NA	13991	NA	42516
Pat58	SRR2767760	1082202	475976	NA	143240	1082358	NA	300305	NA	143262	NA	300346
Pat129	SRR2768297	558725	140845	NA	27285	558827	NA	95139	NA	27292	NA	95166
Pat02	SRR2773166	1144937	199970	492928	37704	1145530	3009354	211284	493521	37743	3011091	211358
Pat43	SRR2776798	724669	144368	290999	17848	724751	1378286	89865	291109	17854	1378600	89871
Pat16	SRR2717684	1061654	551014	1262144	66328	1061726	2382869	133103	1262256	66334	2383028	133110
Pat119	SRR2727854	187135	88156	206784	12534	187211	434939	38421	206893	12542	435097	38434
Pat86	SRR2587585	291759	54236	132032	16016	291921	713742	103449	132181	16044	714128	103525
Pat88	SRR2765304	1560503	774654	1757299	94081	1560750	3672084	202633	1757689	94101	3672631	202655
Pat54	SRR2726249	491428	249739	NA	37546	491561	NA	104797	NA	37556	NA	104814
Pat105	SRR2589393	1735044	300322	NA	68977	1735231	NA	427644	NA	68993	NA	427693
Pat21	SRR2702801	718505	355605	NA	52290	718522	NA	144316	NA	52290	NA	144316
Pat104	SRR2753222	280191	48616	NA	7054	280287	NA	41010	NA	7062	NA	41030
Pat106	SRR2732125	63708	11822	NA	850	63729	NA	3194	NA	850	NA	3194
Pat147	SRR2774969	830703	221688	NA	41604	830715	NA	201329	NA	41604	NA	201329
Pat36	SRR2771331	93925	15725	26765	9520	93946	169157	58575	26775	9522	169201	58585
Pat15	SRR2768790	249114	84712	205739	19990	249415	586696	78951	206171	20019	587367	78967
Pat08	SRR2773750	546887	134605	352426	35619	547007	1514447	198605	352600	35645	1514827	198670
Pat139	SRR2684746	1921767	550556	NA	75347	1923676	NA	304754	NA	75452	NA	305037
Pat25	SRR2589158	1681506	262706	572683	72232	1681720	3838691	373330	572873	72255	3839251	373351
Pat60	SRR2776179	446688	221698	NA	33528	446743	NA	108975	NA	33538	NA	108991
Pat77	SRR2772803	855630	212367	NA	32572	855650	NA	146077	NA	32573	NA	146078
Pat110	SRR2774559	2890811	1695149	NA	192647	2891493	NA	382150	NA	192687	NA	382215
Pat162	SRR2692147	4830521	647783	NA	170275	4832573	NA	1263915	NA	170476	NA	1264486
Pat06	SRR2675035	140684	47594	124494	9733	140688	317841	30683	124500	9734	317853	30686
Pat38	SRR2661602	958575	567884	1514837	147338	958730	2522614	250021	1515130	147363	2523051	250054
Pat85	SRR2777326	265825	100158	240750	15377	265832	703051	47398	240776	15377	703077	47398
Pat163	SRR2740217	11854457	1972729	NA	517329	11866225	NA	3260158	NA	518148	NA	3262725
Pat07	SRR2779374	144889	57610	NA	8426	144918	NA	27563	NA	8429	NA	27567
Pat66	SRR2693653	361738	119825	NA	16816	361739	NA	56065	NA	16816	NA	56065
Pat40	SRR2663198	3341185	475892	1075280	113733	3341681	7733877	835248	1075679	113766	7735113	835358
Pat115	SRR2675269	322681	82823	NA	24653	322856	NA	89475	NA	24687	NA	89535
Pat63	SRR2770409	630893	174329	NA	31775	630893	NA	161043	NA	31775	NA	161043
Pat39	SRR2757601	5892000	841104	1815637	148544	5892989	12986404	1050421	1816458	148619	12988672	1050573
Pat50	SRR2774183	410334	150506	372078	25260	410367	1001140	65611	372121	25263	1001213	65614
Pat168	SRR2778705	14522035	2026464	NA	387526	14524057	NA	2830654	NA	387637	NA	2830975
Pat45	SRR2677161	551950	270880	625032	36712	552219	1279842	95831	625402	36735	1280437	95880
Pat64	SRR2589808	598461	227294	NA	36536	598514	NA	143615	NA	36540	NA	143619
Pat140	SRR2777977	3173972	577027	NA	144179	3174134	NA	833094	NA	144196	NA	833125
Pat29	SRR2773533	472471	206853	518777	31057	472561	1213936	93611	518905	31070	1214248	93642
Pat132	SRR2674312	5872777	1078604	NA	263701	5873729	NA	1347728	NA	263788	NA	1347958
Pat109	SRR2762331	10106059	1514099	NA	360932	10110857	NA	2483666	NA	361335	NA	2485050
Case1-UCLA	SRR3653952;SRR3653953	807391	356626	NA	46408	807414	NA	123221	NA	46410.5	NA	123224
Case2-UCLA	SRR3653959	161900	88447	NA	10965	162001	NA	21812	NA	10970	NA	21828
Case4-UCLA	SRR3653954;SRR3653955	271804	119297	NA	28329.5	271810	NA	94740.5	NA	28329.5	NA	94740.5
Case3-UCLA	SRR3653963	233693	103462	NA	34973	233700	NA	129257	NA	34973	NA	129257
8	982746-6	294666	148946	NA	16594	294902	NA	43425	NA	16616	NA	43463
4	966214-4	77301	43898	NA	6191	77309	NA	11094	NA	6191	NA	11094
13	1004223-5	1300683	793877	NA	93390	1300787	NA	165059	NA	93395	NA	165067
1	951228-3	255308	150212	NA	13770	255555	NA	25774	NA	13796	NA	25831
15	1018464-1	3624784	2135025	NA	232669	3625541	NA	448736	NA	232753	NA	448866
11	997065-5	289235	149043	NA	22942	289257	NA	52981	NA	22943	NA	52982
5	971484-3	24089	12246	NA	1088	24096	NA	2944	NA	1089	NA	2945
7	980720-34	119379	68338	NA	6734	119426	NA	12085	NA	6736	NA	12090
14	1016452-2	591510	348179	NA	41383	591704	NA	84384	NA	41400	NA	84418
6	978614-3	625019	353640	NA	40790	625131	NA	82795	NA	40797	NA	82804
3	967658-5	17963	2675	NA	272	17966	NA	2391	NA	272	NA	2391
16	1029860-5	85086	43070	NA	4907	85099	NA	9144	NA	4907	NA	9144
2	18931416	666220	385098	NA	42727	666396	NA	85408	NA	42739	NA	85424
10	988518-5	13756	2701	NA	0	13759	NA	0	NA	0	NA	0
12	1007449-2	102438	53385	NA	6949	102462	NA	14621	NA	6950	NA	14625
DM016	SRR6431471	1122683	329086	NA	44435	1123575	NA	187507	NA	44486	NA	187661
DM010	SRR6431461	3275712	664722	NA	145390	3276289	NA	821812	NA	145446	NA	821984
DM012	SRR6431463	1040748	195136	NA	49586	1040890	NA	213170	NA	49602	NA	213200
DM005	SRR6431455	1683600	905673	NA	113556	1683689	NA	255674	NA	113561	NA	255683
DM024	SRR6431487	893719	213376	NA	40565	894073	NA	186064	NA	40596	NA	186127
DM020	SRR6431479	679108	359139	NA	34778	679108	NA	91095	NA	34778	NA	91095
DM021	SRR6431481	442655	172651	NA	30281	442840	NA	89524	NA	30307	NA	89595
DM015	SRR6431469	830677	513366	NA	71587	833510	NA	122858	NA	71887	NA	123266
DM017	SRR6431473	892210	550007	NA	57160	892432	NA	97536	NA	57180	NA	97568
DM022	SRR6431483	616758	330775	NA	28973	616831	NA	63605	NA	28975	NA	63613
DM009	SRR6431459	936849	525014	NA	55489	936977	NA	114983	NA	55501	NA	115009
DM007	SRR6431457	736138	420656	NA	51792	736684	NA	115189	NA	51847	NA	115297
DM023	SRR6431485	662207	336108	NA	46069	662269	NA	102247	NA	46072	NA	102250
DM013	SRR6431465	857060	519993	NA	57232	860436	NA	109637	NA	57461	NA	109952
DM014	SRR6431467	1286904	261245	NA	42818	1287215	NA	201625	NA	42842	NA	201665
DM019	SRR6431477	770588	437921	NA	54455	770783	NA	96622	NA	54465	NA	96636
DM018	SRR6431475	13212498	1922981	NA	436148	13214147	NA	3239558	NA	436279	NA	3239987

## Sheet: Supplementary Table S5
Supplementary Table S5: Tumor-specific splice junction burdens. The “Patient” column indicates the patient identifier, and the “Tumor_ID” column indicates the tumor sample identifier(s). The “Jx_burden” column indicates the number of tumor-specific splice junctions per patient; for patients with more than one tumor sample, median values are presented.
Patient	Tumor	Jx_burden
SD1494	SRR3341279	503
NR9449	SRR3341255	555
SD0346	SRR3341277	593
NR9705	SRR3341259	789
SD5038	SRR3341285	411
LSD0167	SRR3341199	734
SD7357	SRR3341295	381
CR1509	SRR3341175	489
NR4810	SRR3341235	436
CR7623	SRR3341187	583
NR5784	SRR3341239	425
SD6494	SRR3341293	730
NR4631	SRR3341233	812
SD6336	SRR3341291	654
NR3549	SRR3341225	714
CR9699	SRR3341191	581
SD2056	SRR3341283	399
SD2051	SRR3341281	460
CR6126	SRR3341183	526
NR9521	SRR3341257	830
Hugo_Pt10	SRR4289717	2755
Hugo_Pt16	SRR4289721	2035
Hugo_Pt8	SRR4289715	1147
Hugo_Pt27	SRR4289725;SRR4289726	2258.5
Hugo_Pt38	SRR4289744	1504
Hugo_Pt32	SRR4289732	989
Hugo_Pt31	SRR4289730	1475
Hugo_Pt37	SRR4289742	1240
Hugo_Pt35	SRR4289738	1620
Hugo_Pt12	SRR3083882	2529
Hugo_Pt13	SRR3083855	2201
Hugo_Pt14	SRR3083868	2603
Hugo_Pt15	SRR3083845	1549
Hugo_Pt19	SRR3083847	958
Hugo_Pt9	SRR3083849	1451
Hugo_Pt2	SRR3083839	1301
Hugo_Pt1	SRR3083866	2167
Hugo_Pt6	SRR3083863	2708
Hugo_Pt7	SRR3083870	1074
Hugo_Pt4	SRR3083837	2449
Hugo_Pt5	SRR3083857	2227
Hugo_Pt29	SRR3083876	1993
Hugo_Pt28	SRR3083851	1050
Hugo_Pt20	SRR3083872	1087
Hugo_Pt23	SRR3083874	1480
Hugo_Pt22	SRR3083878	2500
Hugo_Pt25	SRR3083880	716
Mel21	SRR2672888;SRR2673015;SRR2673095	2445
Mel38	SRR2672866;SRR2673115	4813.5
Mel218	SRR2672890	3103
Pat19	SRR2779901	1952
Pat15	SRR2768790	2391
Pat14	SRR2774418	3972
Pat16	SRR2717684	1823
Pat80	SRR2765066	3022
Pat46	SRR2679013	2955
Pat47	SRR2772900	1643
Pat44	SRR2588166	2812
Pat45	SRR2677161	2291
Pat43	SRR2776798	899
Pat40	SRR2663198	3194
Pat41	SRR2775592	16
Pat49	SRR2777655	3256
Pat119	SRR2727854	2345
Pat118	SRR2777738	1743
Pat08	SRR2773750	3496
Pat02	SRR2773166	1135
Pat03	SRR2587785	3684
Pat06	SRR2675035	2442
Pat04	SRR2723814	2705
Pat90	SRR2588053	3503
Pat98	SRR2588422	2363
Pat36	SRR2771331	2620
Pat79	SRR2757072	2062
Pat126	SRR2772336	3271
Pat123	SRR2679057	2997
Pat37	SRR2773626	2903
Pat33	SRR2677297	3633
Pat39	SRR2757601	478
Pat38	SRR2661602	2691
Pat83	SRR2703695	3656
Pat81	SRR2707236	2251
Pat86	SRR2587585	2403
Pat85	SRR2777326	3146
Pat88	SRR2765304	3413
Pat25	SRR2589158	4817
Pat27	SRR2681131	3565
Pat28	SRR2771788	3888
Pat29	SRR2773533	3683
Pat50	SRR2774183	2951
PD_011	SRR6461159	893
PD_026	SRR6461170	1685
PD_019	SRR6504580	1301
PD_025	SRR6461173	1401
PD_012	SRR6504840	1956
PD_014	SRR6461162	1089
PD_010	SRR6461165	1487
PD_024	SRR6461167	609
PD_007	SRR6889242	1124
PD_005	SRR6461166	1119
PD_013	SRR6461172	2023
PD_020	SRR6461168	1833
PD_015	SRR6491482	1304
PD_018	SRR6461150	1043
PD_021	SRR6461163	1650
PD_023	SRR6504581	949
PD_022	SRR6461155	1131

## Sheet: Supplementary Table S6
Supplementary Table S6: Tumor-specific retained intron and retained intron epitope burdens. The “Patient” column indicates the patient identifier, and the “Tumor_ID” column indicates the tumor sample identifier(s); for patients with more than one tumor sample, median values are presented in subsequent columns of the table. The “Intron_burden” column indicates the number of tumor-specific retained…
Patient	Tumor_ID	Intron_burden	Intron_epitope_burden	Binding_intron_epitope_burden
Pat19	SRR2779901	0	0	0
CR1509	SRR3341175	0	0	0
SD1494	SRR3341279	0	0	0
Mel38	SRR2672866;SRR2673115	0	0	0
Pat15	SRR2768790	0	0	0
Pat14	SRR2774418	0	0	0
Pat16	SRR2717684	0	0	0
PD_018	SRR6461150	0	0	0
NR4810	SRR3341235	0	0	0
Hugo_Pt8	SRR4289715	908	2270354	642213
Hugo_Pt9	SRR3083849	1347	2270354	413536
Hugo_Pt2	SRR3083839	977	2270354	486812
Hugo_Pt1	SRR3083866	692	2270354	502501
Hugo_Pt6	SRR3083863	579	2270354	375986
Hugo_Pt7	SRR3083870	726	2270354	744293
Hugo_Pt4	SRR3083837	740	2270354	320605
Hugo_Pt5	SRR3083857	1281	2270354	320380
Pat08	SRR2773750	0	0	0
PD_011	SRR6461159	0	0	0
Pat02	SRR2773166	0	0	0
Pat03	SRR2587785	0	0	0
Pat06	SRR2675035	0	0	0
Pat04	SRR2723814	0	0	0
Pat90	SRR2588053	0	0	0
Pat98	SRR2588422	0	0	0
Pat37	SRR2773626	0	0	0
Mel218	SRR2672890	0	0	0
Pat33	SRR2677297	0	0	0
Pat39	SRR2757601	0	0	0
Pat38	SRR2661602	0	0	0
NR9449	SRR3341255	0	0	0
SD2056	SRR3341283	0	0	0
SD2051	SRR3341281	0	0	0
Pat83	SRR2703695	0	0	0
Pat80	SRR2765066	0	0	0
Pat81	SRR2707236	0	0	0
Pat86	SRR2587585	0	0	0
Pat85	SRR2777326	0	0	0
Pat88	SRR2765304	0	0	0
Pat25	SRR2589158	0	0	0
Pat27	SRR2681131	0	0	0
Pat28	SRR2771788	0	0	0
Pat29	SRR2773533	0	0	0
SD6494	SRR3341293	0	0	0
Hugo_Pt29	SRR3083876	640	2270354	326533
Hugo_Pt28	SRR3083851	1230	2270354	529109
Hugo_Pt20	SRR3083872	929	2270354	350218
Hugo_Pt23	SRR3083874	904	2270354	315045
Hugo_Pt22	SRR3083878	767	2270354	265415
Hugo_Pt25	SRR3083880	2196	2270354	757337
Hugo_Pt27	SRR4289725;SRR4289726	608	2270354	349748
Pat36	SRR2771331	0	0	0
CR7623	SRR3341187	0	0	0
Pat50	SRR2774183	0	0	0
SD0346	SRR3341277	0	0	0
Hugo_Pt38	SRR4289744	1774	2270354	366843
Hugo_Pt32	SRR4289732	2371	2270354	284222
NR5784	SRR3341239	0	0	0
Hugo_Pt31	SRR4289730	2714	2270354	355754
Hugo_Pt37	SRR4289742	2004	2270354	397454
Hugo_Pt35	SRR4289738	944	2270354	659327
NR9705	SRR3341259	0	0	0
NR4631	SRR3341233	0	0	0
CR6126	SRR3341183	0	0	0
SD5038	SRR3341285	0	0	0
Pat46	SRR2679013	0	0	0
Pat47	SRR2772900	0	0	0
Pat44	SRR2588166	0	0	0
Pat45	SRR2677161	0	0	0
Pat43	SRR2776798	0	0	0
Pat40	SRR2663198	0	0	0
Pat41	SRR2775592	0	0	0
SD6336	SRR3341291	0	0	0
Pat49	SRR2777655	0	0	0
PD_025	SRR6461173	0	0	0
PD_024	SRR6461167	0	0	0
PD_026	SRR6461170	0	0	0
PD_021	SRR6461163	0	0	0
PD_020	SRR6461168	0	0	0
PD_023	SRR6504581	0	0	0
PD_022	SRR6461155	0	0	0
NR9521	SRR3341257	0	0	0
Pat79	SRR2757072	0	0	0
Pat119	SRR2727854	0	0	0
Pat118	SRR2777738	0	0	0
Hugo_Pt10	SRR4289717	822	2270354	188539
PD_019	SRR6504580	0	0	0
Hugo_Pt12	SRR3083882	684	2270354	418341
Hugo_Pt13	SRR3083855	692	2270354	708623
Hugo_Pt14	SRR3083868	668	2270354	349566
Hugo_Pt15	SRR3083845	1157	2270354	148240
Hugo_Pt16	SRR4289721	1734	2270354	206654
NR3549	SRR3341225	0	0	0
PD_010	SRR6461165	0	0	0
Hugo_Pt19	SRR3083847	1459	2270354	671026
PD_012	SRR6504840	0	0	0
PD_013	SRR6461172	0	0	0
PD_014	SRR6461162	0	0	0
PD_015	SRR6491482	0	0	0
CR9699	SRR3341191	0	0	0
Mel21	SRR2672888;SRR2673015;SRR2673095	0	0	0
LSD0167	SRR3341199	0	0	0
PD_007	SRR6889242	0	0	0
PD_005	SRR6461166	0	0	0
Pat126	SRR2772336	0	0	0
Pat123	SRR2679057	0	0	0
SD7357	SRR3341295	0	0	0

## Sheet: Supplementary Table S7
Supplementary Table S7: Processed neoepitope burdens. The “Patient” column indicates the patient identifier, and the “Tumor_ID” column indicates the tumor sample identifier(s). The “NetCTLpan_epitopes” column represents the number of neopeptides predicted by NetCTLpan to be proteasomally processed, TAP transported, and cell-surface presented for at least one patient MHC Class I allele; for patien…
Patient	Tumor_ID	NetCTLpan_epitopes
PGDX6334	PGDX6334T_Ex_TGACCA	1396
Hugo_Pt13	SRR3083855	974
Hugo_Pt26	SRR3083843	1627
Pat160	SRR2778175	9602
Pat32	SRR2689326	2033
Pat126	SRR2772336	1211
LSD0167	SRR3341199	709
Hugo_Pt22	SRR3083878	332
P7	SRR5149290	92
VA7859	SRR2648161	46
RCC_97	SRR6468341	1654
PD_020	SRR6461168	501
28	28A;28D	786.5
LSD3484	SRR3341203	891
P50	SRR5149287	4885
PGDX3153	PGDX3153T_Ex	4224
CRNR0244	SRR3341193	1095
11025-10	Pem10T	455
Pat82	SRR2682345	1059
RCC_25	SRR6504586	673
RCC_371982	SRR6450222	1201
Pat41	SRR2775592	847
Pat90	SRR2588053	447
RCC_509214	SRR6450231	362
Hugo_Pt31	SRR4289730	1296
Hugo_Pt23	SRR3083874	292
42	42E	378
PD_018	SRR6461150	724
SD7357	SRR3341295	168
DM005	SRR6431455	4212
Pat21	SRR2702801	1690
Hugo_Pt29	SRR3083876	476
19	19D	5873
PD_005	SRR6461166	494
Pat16	SRR2717684	3055
Pat25	SRR2589158	1213
45	45C;45E	3310.5
14	1016452-2	1270
Pat119	SRR2727854	522
PGDX3147	PGDX3147T_Ex	1023
NR4949	SRR3341237	513
53	53A;53D	934
CR6126	SRR3341183	831
AU5884	SRR2648105	143
Pat129	SRR2768297	539
Hugo_Pt18	SRR3083859	476
Mel38	SRR2672866;SRR2673115	442
Pat06	SRR2675035	314
SD0346	SRR3341277	485
NR9449	SRR3341255	574
11025-13	Pem13T	337
23	23A	275
3	3C;3D1;3D2	498
Pat77	SRR2772803	1509
SC0899	SRR2648151	784
CR22640	SRR3341177	1392
P54	SRR5149299	737
Hugo_Pt12	SRR3083882	181
PD_022	SRR6461155	389
15	15C	1730
SA9755	SRR2648147	3205
Pat159	SRR2777240	31645
PGDX3144	PGDX3144T_Ex	2071
31	31A	859
IM_002	SRR6461147	675
P16	SRR5149298	1871
PGDX3156	PGDX3156T_Ex	2987
Pat175	SRR2770550	287
Pat19	SRR2779901	714
NR6842	SRR3341245	177
LSDNR3086	SRR3341215	334
Pat80	SRR2765066	508
3	967658-5	9
M4945	SRR2648133	775
Hugo_Pt16	SRR4289721	744
AL4602	SRR2648103	555
4	966214-4	181
Pat33	SRR2677297	698
18	18A;18C	210.5
RCC_554652	SRR6450232	609
Pat79	SRR2757072	445
Pat157	SRR2706574	5264
Hugo_Pt27	SRR4289725;SRR4289726	4346.5
50	50A;50C	4667.5
Pat118	SRR2777738	447
SD1494	SRR3341279	1542
PGDX3157	PGDX3157T_Ex	413
Mel218	SRR2672890	1715
SD6336	SRR3341291	679
GR0134	SRR2648119	200
CRNR4941	SRR3341197	160
Pat54	SRR2726249	1489
Hugo_Pt20	SRR3083872	949
P31	SRR5149286	859
DM023	SRR6431485	1699
LSD2057	SRR3341201	557
34	34A	4790
54	54A;54C	771
Pat39	SRR2757601	6069
12	1007449-2	196
NR6721	SRR3341243	282
DM022	SRR6431483	2029
LSDNR9298	SRR3341217	1985
FR9547	SRR2648117	396
Pat66	SRR2693653	610
Hugo_Pt34	SRR4289736	320
RCC_390392	SRR6450229	816
Hugo_Pt15	SRR3083845	1177
Hugo_Pt19	SRR3083847	1047
Pat132	SRR2674312	8875
PGDX4397	PGDX4397T_Ex	1402
Pat109	SRR2762331	10996
Pat15	SRR2768790	403
SD5118	SRR3341287	30
Pat14	SRR2774418	93
RCC_56	SRR6468373	274
Pat113	SRR2661932	457
Pat101	SRR2760983	2058
SC6470	SRR2648153	289
Pat76	SRR2668212	386
SD2056	SRR3341283	219
NR9445	SRR3341253	743
R7495	SRR2648139	150
Pat74	SRR2680970	1020
Mel21	SRR2672888;SRR2673015;SRR2673095	711
SB010944	SRR2648149	303
Case3-UCLA	SRR3653963	509
13	1004223-5	3405
RCC_62	SRR6468347	532
DM009	SRR6431459	2853
PR12117	SRR3341265	2141
RCC_20	SRR6468302	5264
Hugo_Pt36	SRR4289740	368
PD_010	SRR6461165	436
PD_014	SRR6461162	1285
Pat85	SRR2777326	432
PGDX3149	PGDX3149T_Ex	359
Pat124	SRR2747991	874
PD_025	SRR6461173	843
Hugo_Pt6	SRR3083863	279
49	49E	2455
Case2-UCLA	SRR3653959	508
RCC_472770	SRR6450230	1132
Pat55	SRR2777872	1150
RCC_11	SRR6468307	3919
11025-35	Pem35T	169
NR4018	SRR3341227	197
P47	SRR5149292	3332
P9	SRR5149288	124
Pat121	SRR2588549	31951
6	978614-3	1984
Pat104	SRR2753222	382
CR0095	SRR3341169	413
25	25A;25C	339
CR1509	SRR3341175	141
SD6494	SRR3341293	232
NR5784	SRR3341239	67
CR9699	SRR3341191	152
Pat165	SRR2589694	11877
Pat18	SRR2780332	218
PD_011	SRR6461159	1723
NR2137	SRR3341221	1087
Pat81	SRR2707236	186
Pat130	SRR2778365	515
PGDX4947	PGDX4947T_Ex_ATGTCA	1232
KA3947	SRR2648127	455
NR9705	SRR3341259	43
29	29C	510
PD_019	SRR6504580	545
Hugo_Pt11	SRR4289719	496
RCC_15	SRR6468326	480
SD5038	SRR3341285	519
PGDX3784	PGDX3784T_Ex	1967
Pat98	SRR2588422	107
LSD4744	SRR3341207	1794
PR4077	SRR3341271	2251
RCC_1	SRR6468332	744
Pat08	SRR2773750	605
37	37B	330
ZA6965	SRR2648169	179
Pat167	SRR2767414	3512
6	6B	91
DM010	SRR6431461	2835
P5	SRR5149289	575
Pat62	SRR2678485	2897
CR04885	SRR3341171	10061
RCC_32	SRR6504589	937
PD_026	SRR6461170	564
Pat73	SRR2772697	458
21	21C	888
Pat67	SRR2771975	354
Hugo_Pt24	SRR3083853	721
NR3549	SRR3341225	543
26	26C;26E	2196
Pat110	SRR2774559	7029
24	24C	1716
PGDX3151	PGDX3151T_Ex	5169
Pat117	SRR2677533	1549
CR6161	SRR3341185	1195
P22	SRR5149294	1181
PGDX3787	PGDX3787T_Ex	2106
PGDX3161	PGDX3161T_Ex	25225
PD_012	SRR6504840	908
TU0428	SRR2648157	1027
Hugo_Pt8	SRR4289715	20382
NI9507	SRR2648137	222
NR4083	SRR3341231	712
Hugo_Pt21	SRR3083861	432
DM015	SRR6431469	2773
Pat105	SRR2589393	1859
CR7623	SRR3341187	318
DI6359	SRR2648113	524
P46	SRR5149300	459
Pat138	SRR2772131	13859
RCC_79	SRR6468316	1516
Pat56	SRR2774324	267
Case1-UCLA	SRR3653952;SRR3653953	2121.5
Pat163	SRR2740217	13772
Pat100	SRR2741440	956
NR1867	SRR3341219	27
ZA6505	SRR2648167	553
Pat38	SRR2661602	3283
RCC_102	SRR6468374	1161
15349_CCPM_0600862	SRR6461181;SRR6504582	284
7	980720-34	324
5	5A	575
Hugo_Pt3	SRR3083841	2470
2	18931416	2168
DM019	SRR6431477	913
BL3403	SRR2648107	187
Hugo_Pt30	SRR4289728	801
Pat43	SRR2776798	754
CR06670	SRR3341173	819
Pat166	SRR2665040	12916
10	988518-5	10
Pat40	SRR2663198	3211
P23	SRR5149295	275
DM014	SRR6431467	1569
Pat03	SRR2587785	1093
HE3202	SRR2648123	1059
Y2087	SRR2648165	13425
Pat45	SRR2677161	1401
PGDX3145	PGDX3145T_Ex	12207
PGDX4137	PGDX4137T1_Ex;PGDX4137T_Ex	3348
Pat07	SRR2779374	315
Pat46	SRR2679013	613
PGDX3146	PGDX3146T_Ex	4567
Pat148	SRR2753967	4431
PD_007	SRR6889242	80
RCC_51974086	SRR6450227	694
Pat168	SRR2778705	12976
Hugo_Pt14	SRR3083868	2381
DM024	SRR6431487	1338
CR4880	SRR3341181	5919
11025-22	Pem22T	533
Hugo_Pt2	SRR3083839	923
2	2E	384
Pat17	SRR2770067	790
DM123062	SRR2648115	259
Pat123	SRR2679057	1017
RI1933	SRR2648143	787
11025-28	Pem28T	381
Pat36	SRR2771331	96
Hugo_Pt38	SRR4289744	163
PGDX4398	PGDX4398T_Ex	4249
P37	SRR5149297	330
Pat162	SRR2692147	5620
16	1029860-5	139
RCC.PD1.DNA.1101	SRR6461171	116
NR9765	SRR3341261	1071
Pat143	SRR2712344	5033
RCC_504642	SRR6450228	502
DM020	SRR6431479	1295
Hugo_Pt7	SRR3083870	1507
4	4D	380
RCC_68	SRR6504583	4721
LO5004	SRR2648131	107
Pat70	SRR2769286	439
Pat28	SRR2771788	3812
Pat63	SRR2770409	1008
Pat27	SRR2681131	313
41	41A	201
Pat140	SRR2777977	2999
Pat49	SRR2777655	1190
Hugo_Pt9	SRR3083849	603
Hugo_Pt5	SRR3083857	689
11	997065-5	761
PD_024	SRR6461167	2588
PD_023	SRR6504581	563
Pat83	SRR2703695	151
15349_CCPM_0600855	SRR6450189	636
Pat106	SRR2732125	58
32	32A	182
20	20A;20E	3925
Pat11	SRR2773334	3647
RCC.PD1.DNA.1137	SRR6461180	7237
Pat135	SRR2731893	5170
Hugo_Pt32	SRR4289732	397
Pat02	SRR2773166	1577
RO3338	SRR2648145	262
11025-17	Pem17T	625
GR4788	SRR2648121	210
Hugo_Pt4	SRR3083837	5622
11025-26	Pem26T	351
LSD6819	SRR3341209	390
P6	SRR5149296	85
Hugo_Pt33	SRR4289734	1079
5	971484-3	84
Case4-UCLA	SRR3653954;SRR3653955	711
PD_030	SRR6461169	889
DM016	SRR6431471	1844
PGDX3785	PGDX3785T_Ex	7175
NR4045	SRR3341229	704
NR4810	SRR3341235	709
7	7A;7D	54
PR4092	SRR3341275	3768
Pat171	SRR2747280	21324
47	47A;47D	1922
Pat44	SRR2588166	596
PR4046	SRR3341269	238
RCC.PD1.DNA.1026	SRR6461164	101
PGDX6340	PGDX6340T_Ex_GCCAAT	1503
RCC_58	SRR6468321	1393
PGDX4127	PGDX4127T_Ex	2697
8	982746-6	818
Pat127	SRR2772054	1361
Pat88	SRR2765304	4896
Hugo_Pt10	SRR4289717	196
Pat47	SRR2772900	245
PGDX3150	PGDX3150T_Ex	19848
RCC_281066	SRR6450224	1444
VA1330	SRR2648159	89
Pat71	SRR2670951	1206
Pat103	SRR2589478	1261
RCC.PD1.DNA.949	SRR6461177	235
NR6689	SRR3341241	142
16	16C;16D	1835.5
1	951228-3	724
IM_001	SRR6504838	46
Pat58	SRR2767760	2397
PGDX3154	PGDX3154T_Ex	8852
RCC_27	SRR6468375	465
DM012	SRR6431463	1325
11025-12	Pem12T	300
9	9A;9C;9D	213
PD_015	SRR6491482	1028
Hugo_Pt28	SRR3083851	936
22	22A;22B	728.5
11025-1	Pem1T	3841
CA9903	SRR2648109	1977
CR3665	SRR3341179	27
NR4631	SRR3341233	1818
LO3793	SRR2648129	333
JB112852	SRR2648125	614
RCC_10	SRR6468339	1183
Pat50	SRR2774183	1261
PR4035	SRR3341267	766
PGDX3148	PGDX3148T_Ex	3342
Hugo_Pt37	SRR4289742	550
RCC_470874	SRR6450226	911
RCC_119	SRR6468311	7023
PGDX3799	PGDX3799T_Ex	2376
LSDNR1120	SRR3341211	643
CR9306	SRR3341189	1353
DM017	SRR6431473	2434
PGDX3158	PGDX3158T_Ex	250
PGDX4311	PGDX4311T_Ex	2094
RH090935	SRR2648141	428
1	1D	272
Pat139	SRR2684746	2820
RCC_39	SRR6468348	727
PD_021	SRR6461163	788
PD_013	SRR6461172	992
Pat29	SRR2773533	1303
Pat24	SRR2663954	253
DM013	SRR6431465	2248
12	12A	394
33	33A;33C	668
MA7027	SRR2648135	428
Pat151	SRR2775456	11540
PGDX3162	PGDX3162T_Ex	3632
NR3156	SRR3341223	9
NR9341	SRR3341251	99
Pat57	SRR2778237	893
CRNR2472	SRR3341195	892
Hugo_Pt17	SRR4289723	447
NR8727	SRR3341247	23
CU9061	SRR2648111	487
Pat64	SRR2589808	1350
DM021	SRR6431481	981
NR8815	SRR3341249	3078
Pat59	SRR2779219	363
Pat86	SRR2587585	438
Pat78	SRR2589276	46327
RCC_52	SRR6504588	1668
Pat92	SRR2775168	25066
Pat170	SRR2679085	13424
NR9521	SRR3341257	1804
DM018	SRR6431475	7784
11025-27	Pem27T	232
SR070761	SRR2648155	1138
Pat128	SRR2709858	244
PR03803	SRR3341263	10201
RCC_84	SRR6468336	1574
SD2051	SRR3341281	55
P24	SRR5149301	1716
Pat131	SRR2780177	3386
RCC_85	SRR6468330	5521
Pat04	SRR2723814	529
RCC_114	SRR6468328	1115
PGDX3783	PGDX3783T_Ex	16
WA7899	SRR2648163	254
Pat147	SRR2774969	1628
DM007	SRR6431457	1845
P25	SRR5149291	298
SD5934	SRR3341289	135
Pat60	SRR2776179	1563
Pat174	SRR2891925	1518
P18	SRR5149293	240
LSD4691	SRR3341205	207
Hugo_Pt35	SRR4289738	551
RCC.PD1.DNA.944	SRR6461175	184
Hugo_Pt1	SRR3083866	3164
PR4091	SRR3341273	572
Pat133	SRR2670626	8953
Pat37	SRR2773626	308
Pat13	SRR2770259	358
LSDNR1650	SRR3341213	81
15	1018464-1	13821
Hugo_Pt25	SRR3083880	164
Pat115	SRR2675269	374
